# Supplementary material for: Rare earth benzene tetraanion-bridged amidinate complexes
Source: PubMed Central journal article supplement (PMC11667736; doi:10.1039/d4sc05982d), 2024-12-17
Supplement: SC-OLF-D4SC05982D-s001.pdf [file SC-OLF-D4SC05982D-s001.pdf]

## Rare Earth Benzene Tetraanion-Bridged Amidinate Complexes

Peng-Bo Jin,<sup>a,†</sup> Qian-Cheng Luo,<sup>a,†</sup> Gemma K. Gransbury,<sup>b</sup> Richard E. P. Winpenny,<sup>\*,b</sup>  
David P. Mills,<sup>\*,b</sup> and Yan-Zhen Zheng<sup>\*,a</sup>

*<sup>a</sup>Frontier Institute of Science and Technology, State Key Laboratory of Electrical Insulation and Power Equipment, MOE Key Laboratory for Nonequilibrium Synthesis of Condensed Matter, Xi'an Key Laboratory of Electronic Devices and Materials Chemistry and School of Chemistry, Xi'an Jiaotong University, 99 Yanxiang Road, Xi'an, Shaanxi 710054, P. R. China.*

*<sup>b</sup>Department of Chemistry, The University of Manchester, Oxford Road, Manchester, M13 9PL, U.K.*

*<sup>†</sup>These authors contributed equally to this work.*

*\*Email: richard.winpenny@manchester.ac.uk; david.mills@manchester.ac.uk;  
zheng.yanzhen@xjtu.edu.cn*

## **Table of Contents**

|                                                   |            |
|---------------------------------------------------|------------|
| <b>1. NMR spectra.....</b>                        | <b>S3</b>  |
| <b>2. Infrared spectra .....</b>                  | <b>S18</b> |
| <b>3. UV-vis-NIR spectroscopy.....</b>            | <b>S23</b> |
| <b>4. Crystallography .....</b>                   | <b>S35</b> |
| <b>5. Magnetism.....</b>                          | <b>S42</b> |
| 5.1 Temperature-swept magnetic measurements ..... | S42        |
| 5.2 Ac magnetic measurements .....                | S45        |
| 5.3 Magnetic relaxation profiles.....             | S49        |
| 5.4 Field-swept magnetic measurements.....        | S54        |
| <b>6. EPR spectroscopy .....</b>                  | <b>S58</b> |
| <b>7. Calculations .....</b>                      | <b>S59</b> |
| <b>8. References .....</b>                        | <b>S85</b> |

## 1. NMR spectra

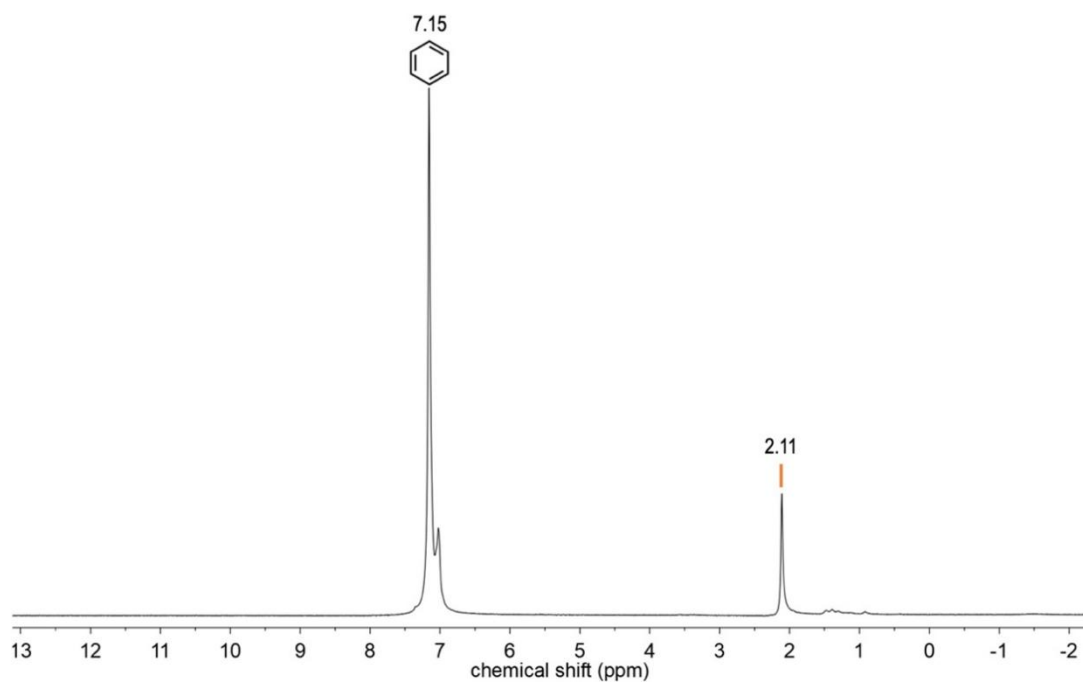

**Figure S1**  $^1\text{H}$  NMR spectrum of **1-Tb-Cl** in  $\text{C}_6\text{D}_6$  in the region -200 to 200 ppm, zoomed in -2 to 13 ppm.

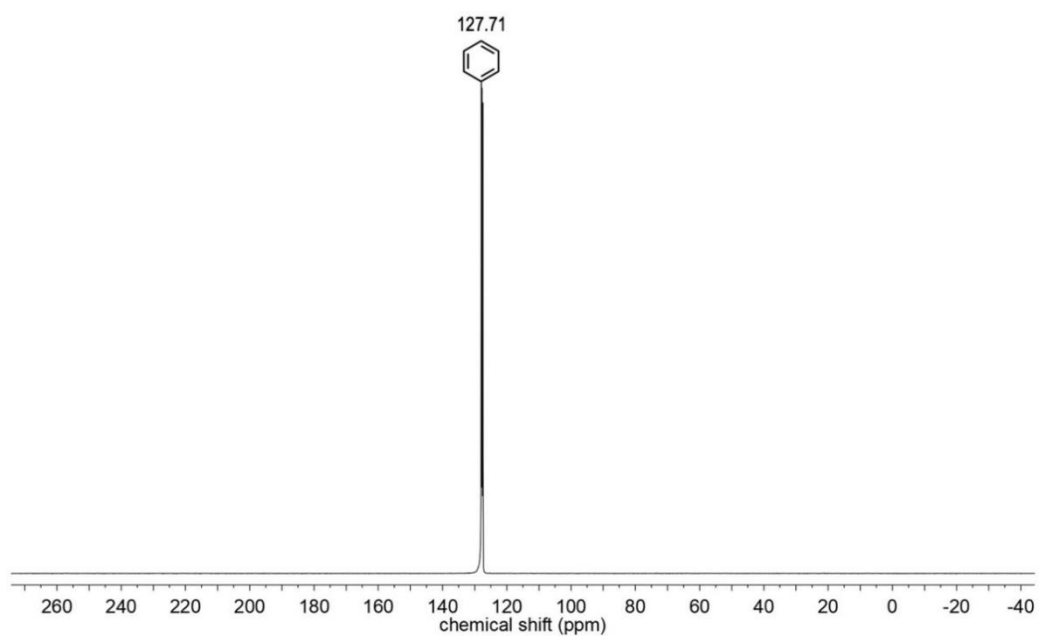

**Figure S2**  $^{13}\text{C}\{^1\text{H}\}$  NMR spectrum of **1-Tb-Cl** in  $\text{C}_6\text{D}_6$  in the region -40 to 270 ppm.

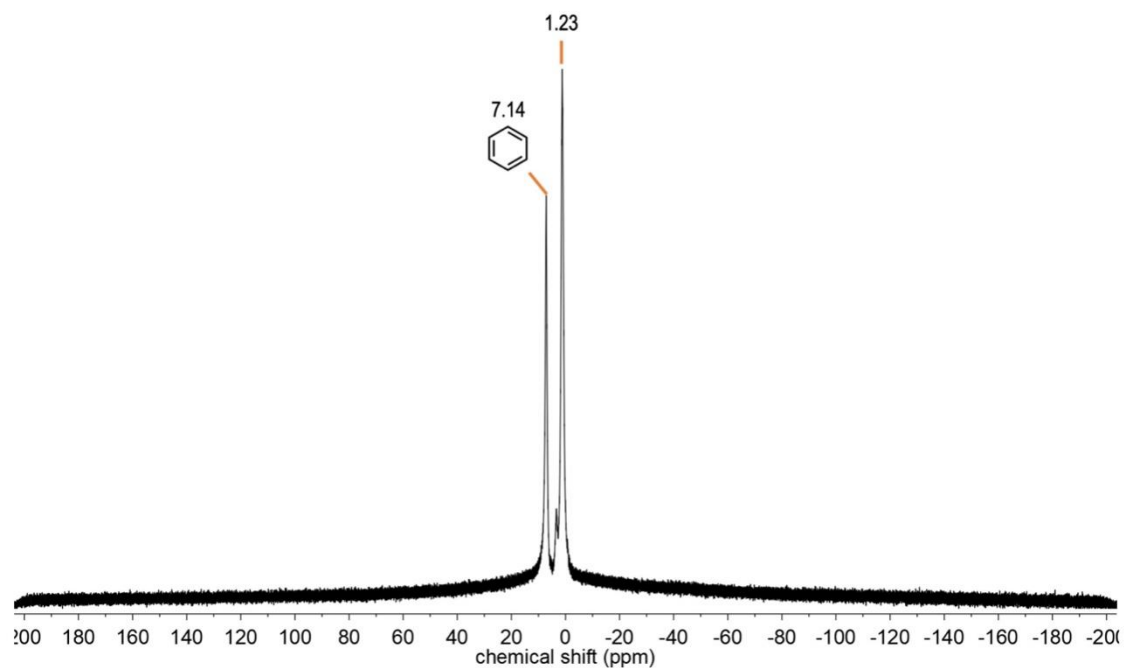

**Figure S3**  $^1\text{H}$  NMR spectrum of **1-Dy-Cl** in  $\text{C}_6\text{D}_6$  in the region -200 to 200 ppm.

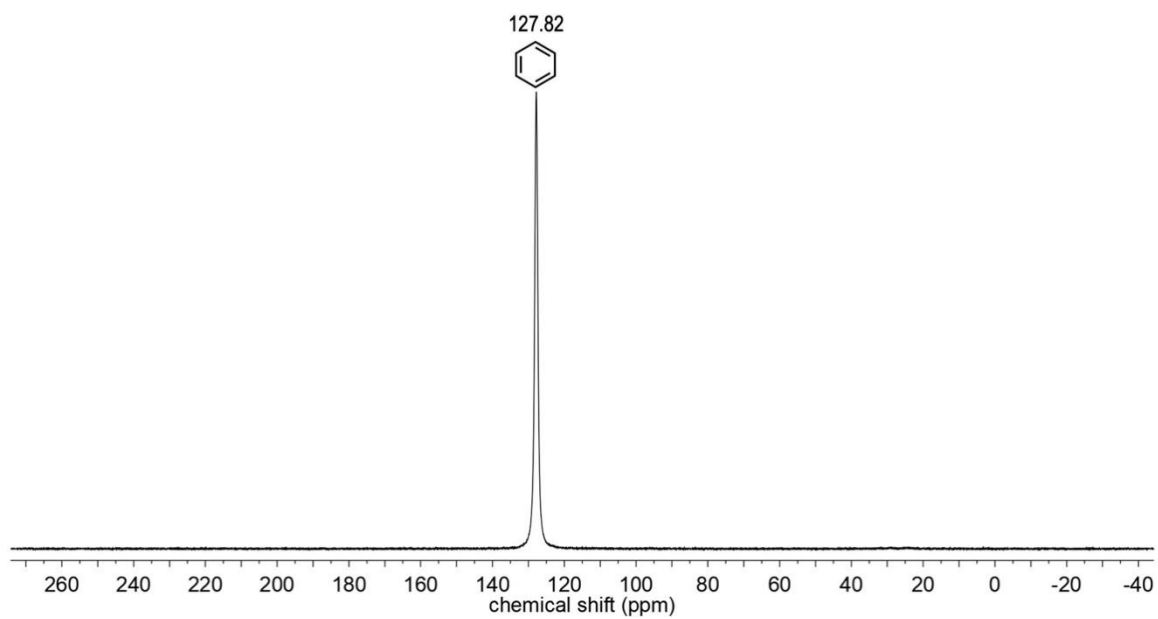

**Figure S4**  $^{13}\text{C}\{^1\text{H}\}$  NMR spectrum of **1-Dy-Cl** in  $\text{C}_6\text{D}_6$  in the region -40 to 270 ppm.

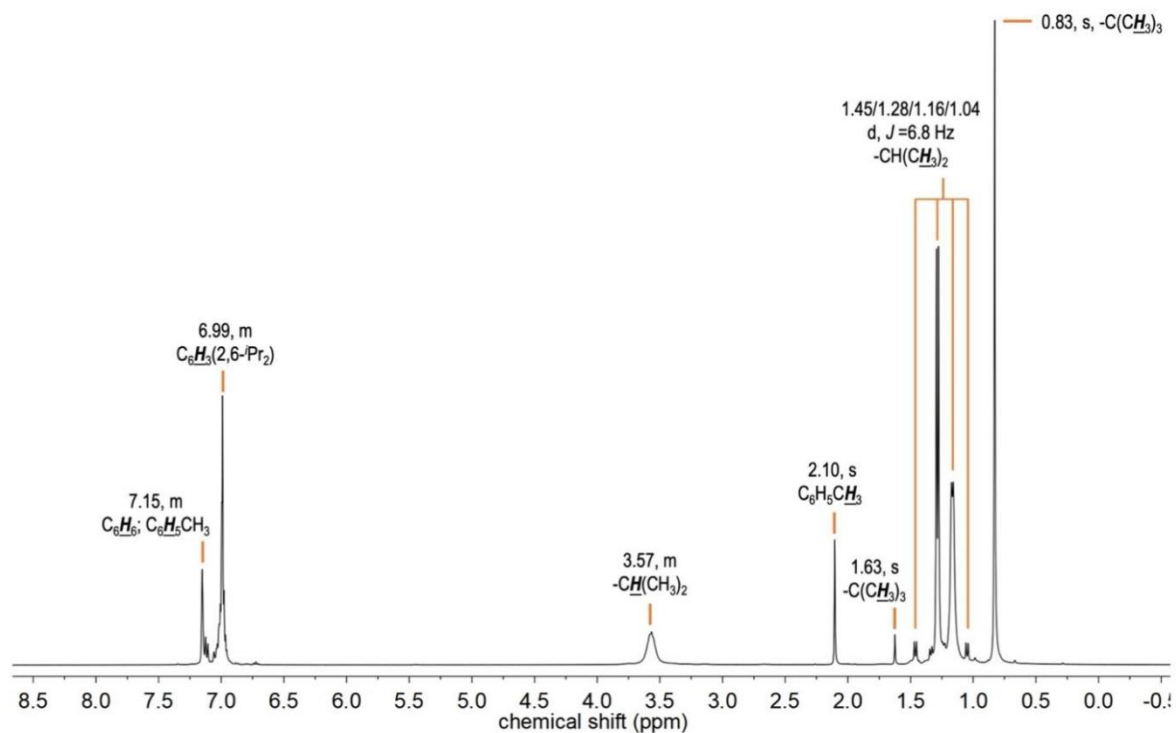

**Figure S5**  $^1\text{H}$  NMR spectrum of **1-Y-I** in  $\text{C}_6\text{D}_6$  in the region -4 to 16 ppm, zoomed in 0 to 9 ppm.

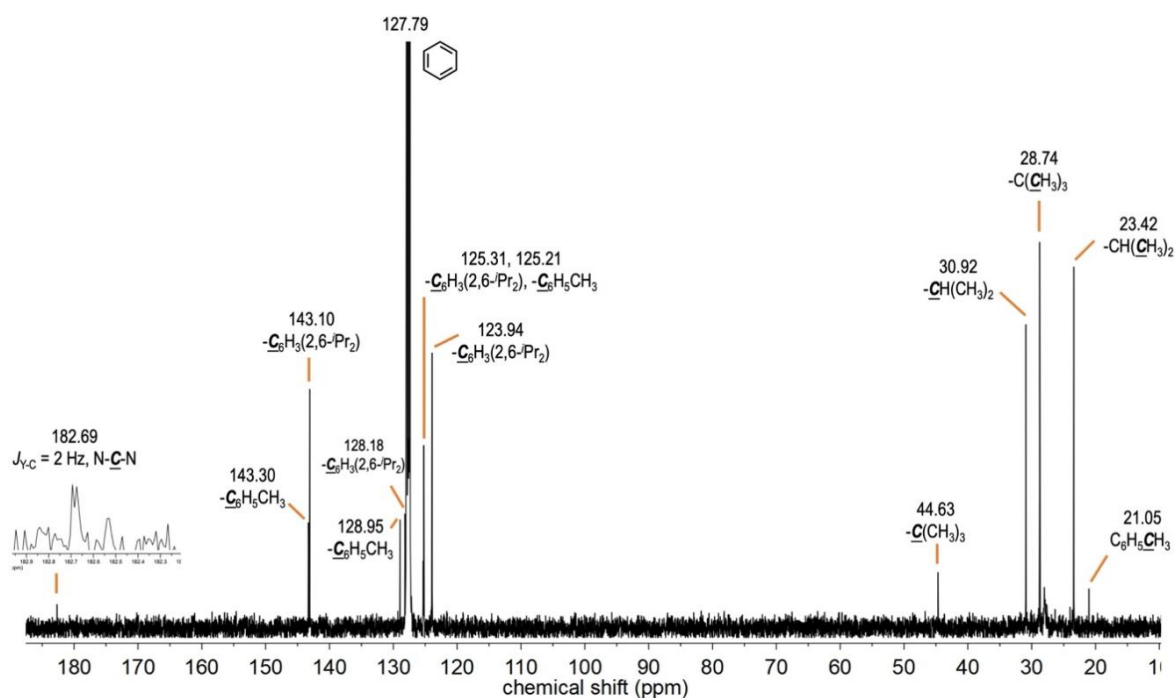

**Figure S6**  $^{13}\text{C}\{^1\text{H}\}$  NMR spectrum of **1-Y-I** in  $\text{C}_6\text{D}_6$  in the region -60 to 260 ppm, zoomed in 10 to 190 ppm.

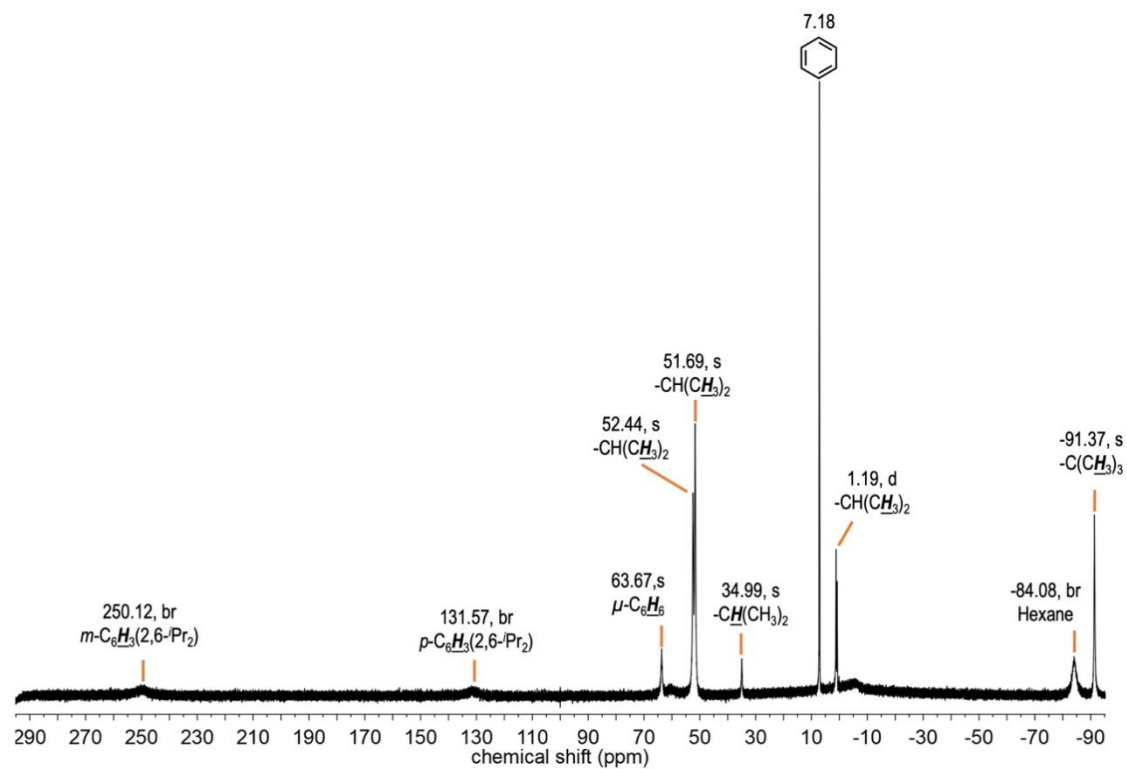

**Figure S7**  $^1\text{H}$  NMR spectrum of **2-Tb** in  $\text{C}_6\text{D}_6$  in the region -90 to 290 ppm.

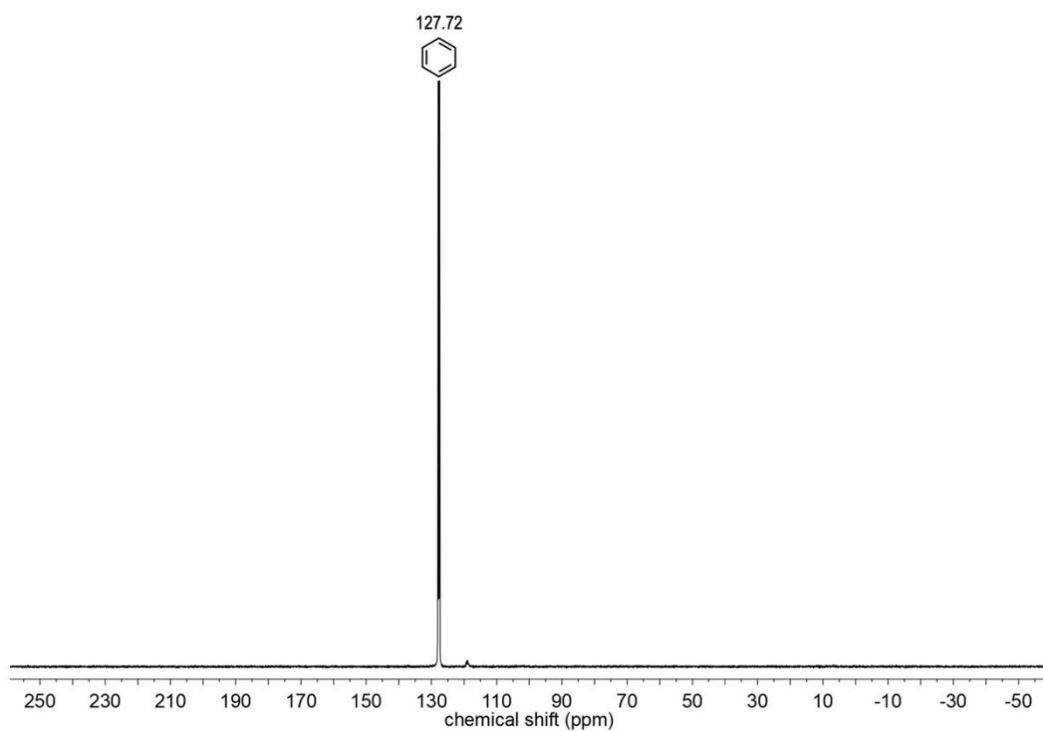

**Figure S8**  $^{13}\text{C}\{^1\text{H}\}$  NMR spectrum of **2-Tb** in  $\text{C}_6\text{D}_6$  in the region -60 to 260 ppm.

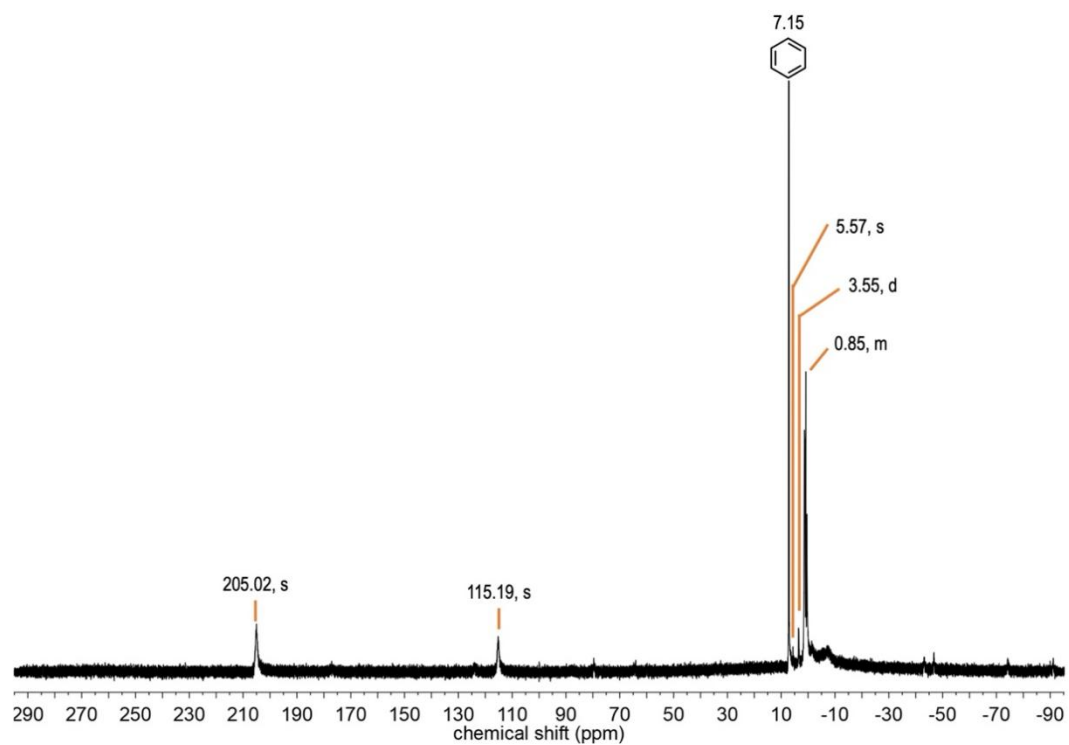

**Figure S9**  $^1\text{H}$  NMR spectrum of **2-Dy** in  $\text{C}_6\text{D}_6$  in the region -90 to 290 ppm.

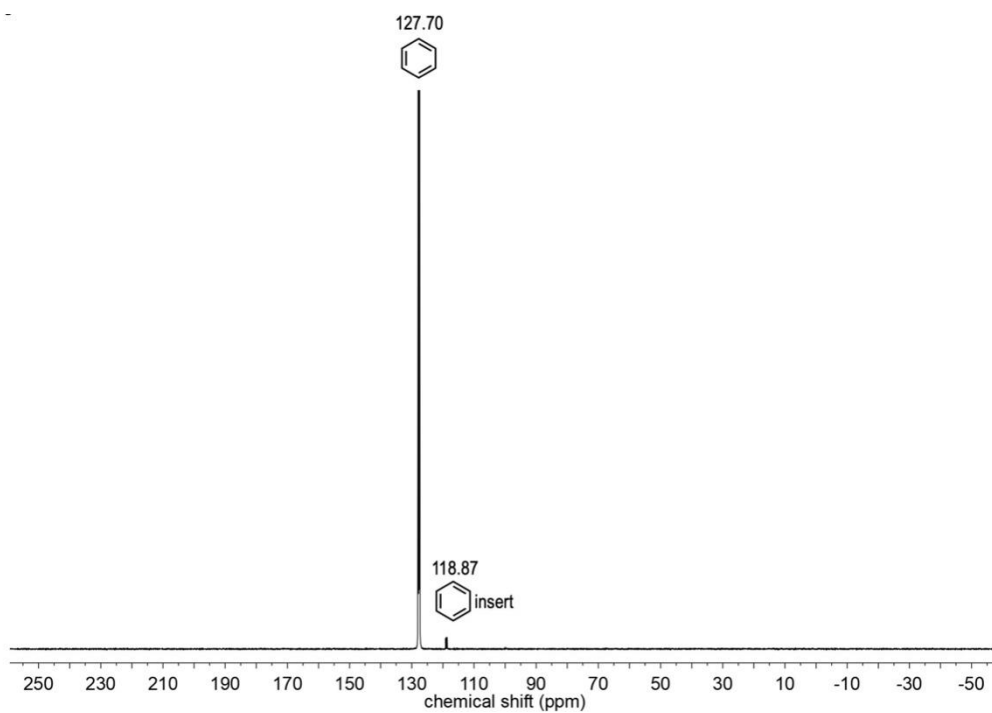

**Figure S10**  $^{13}\text{C}\{^1\text{H}\}$  NMR spectrum of **2-Dy** in  $\text{C}_6\text{D}_6$  in the region -60 to 260 ppm.

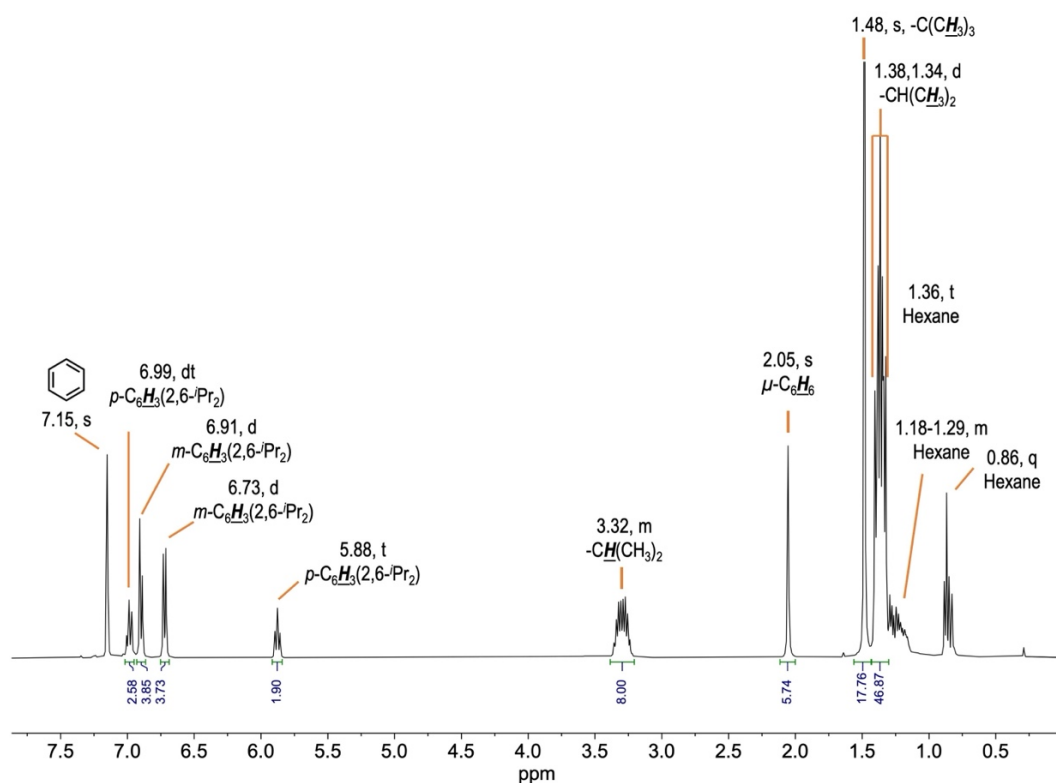

**Figure S11**  $^1\text{H}$  NMR spectrum of **2-Y** in  $\text{C}_6\text{D}_6$  in the region -4 to 16 ppm, zoomed in 0 to 8 ppm.

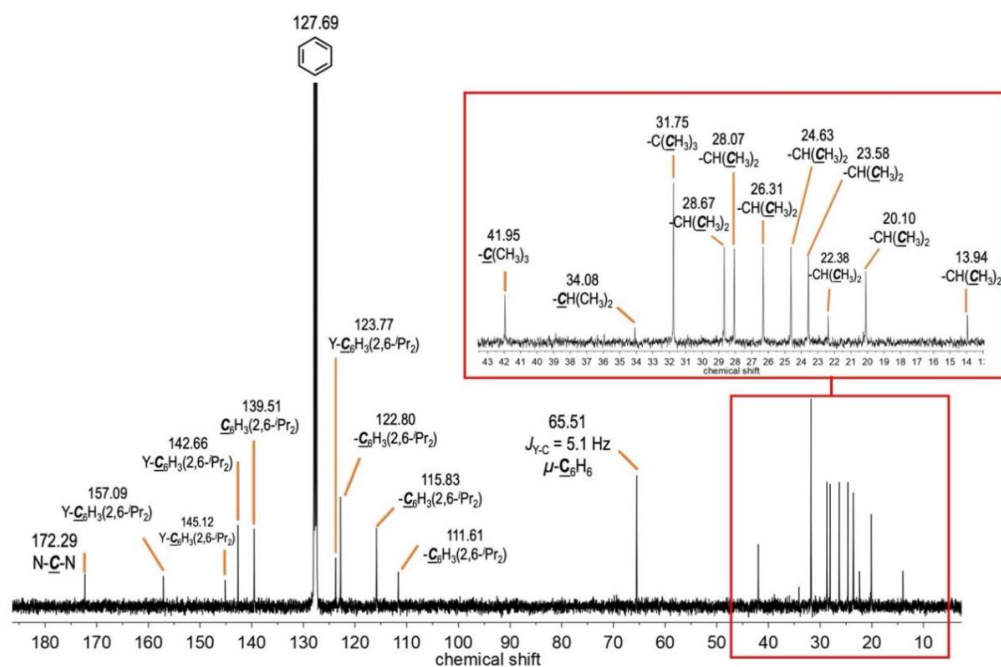

**Figure S12**  $^{13}\text{C}\{^1\text{H}\}$  NMR spectrum of **2-Y** in  $\text{C}_6\text{D}_6$  in the region -60 to 260 ppm, zoomed in 0 to 190 ppm.



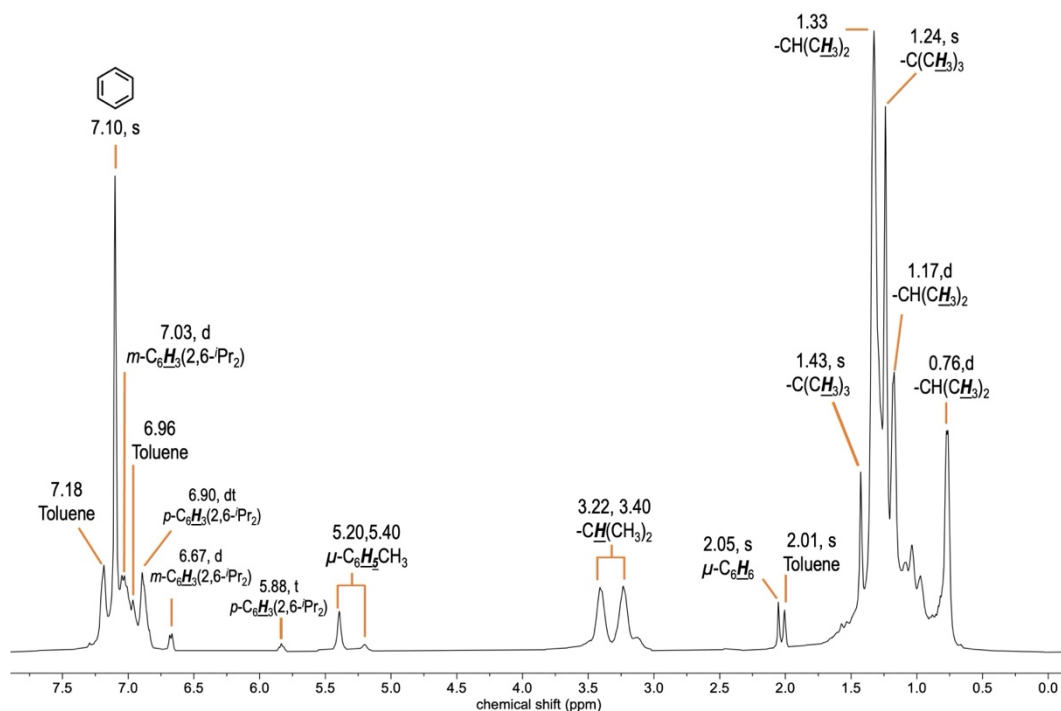

**Figure S13**  $^1\text{H}$  NMR spectrum in  $\text{C}_6\text{D}_6$  of an arene exchange reaction of **2-Y** treated with 5 mL toluene for 12 hours in the region -4 to 16 ppm, zoomed in 0 to 8 ppm.

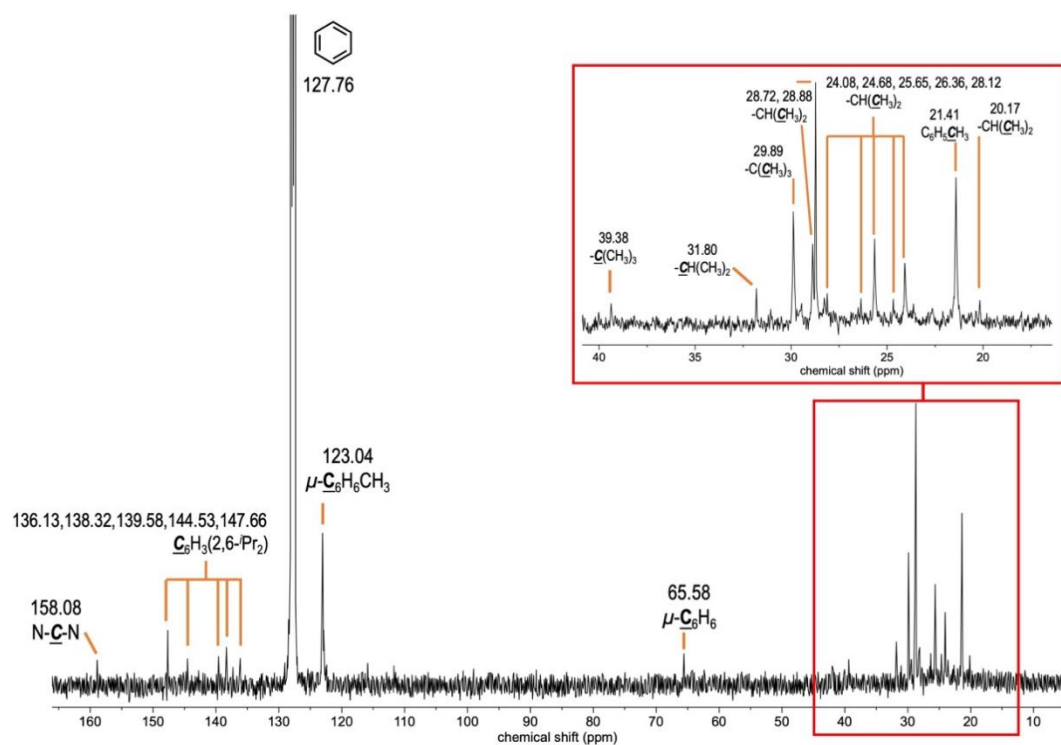

**Figure S14**  $^{13}\text{C}\{^1\text{H}\}$  NMR spectrum in  $\text{C}_6\text{D}_6$  of an arene exchange reaction of **2-Y** treated with 5 mL toluene for 12 hours in the region -60 to 260 ppm, zoomed in 0 to 170 ppm.

- free C<sub>6</sub>H<sub>6</sub>    ● decomposition <sup>t</sup>Bu-Piso
- μ-C<sub>6</sub>H<sub>6</sub>    ● decomposition <sup>i</sup>Pr-Piso

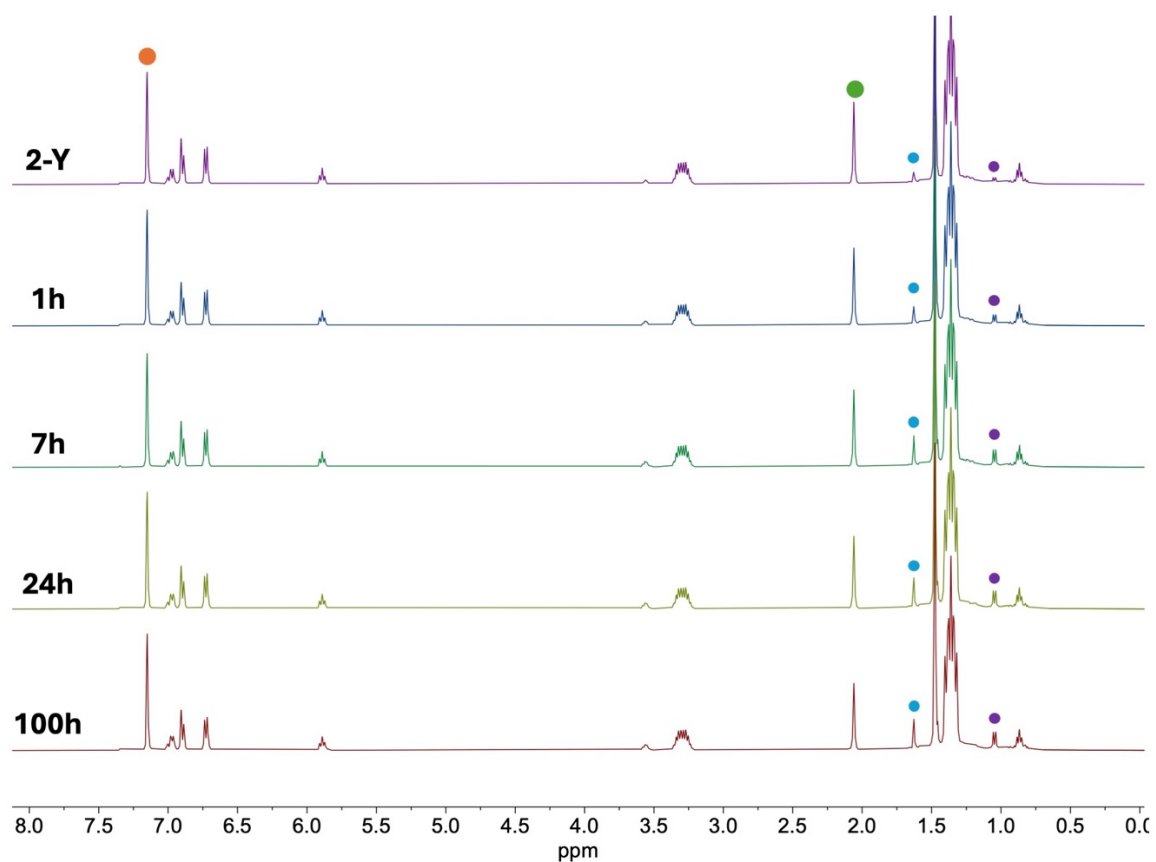

**Figure S15** Stacked <sup>1</sup>H NMR spectra showing time evolution of a solution of **2-Y** in C<sub>6</sub>D<sub>6</sub> heated at 80 °C for up to 100 h in the region 0 to 8 ppm. No arene exchange was observed between **2-Y** and C<sub>6</sub>D<sub>6</sub>, just some minor decomposition.

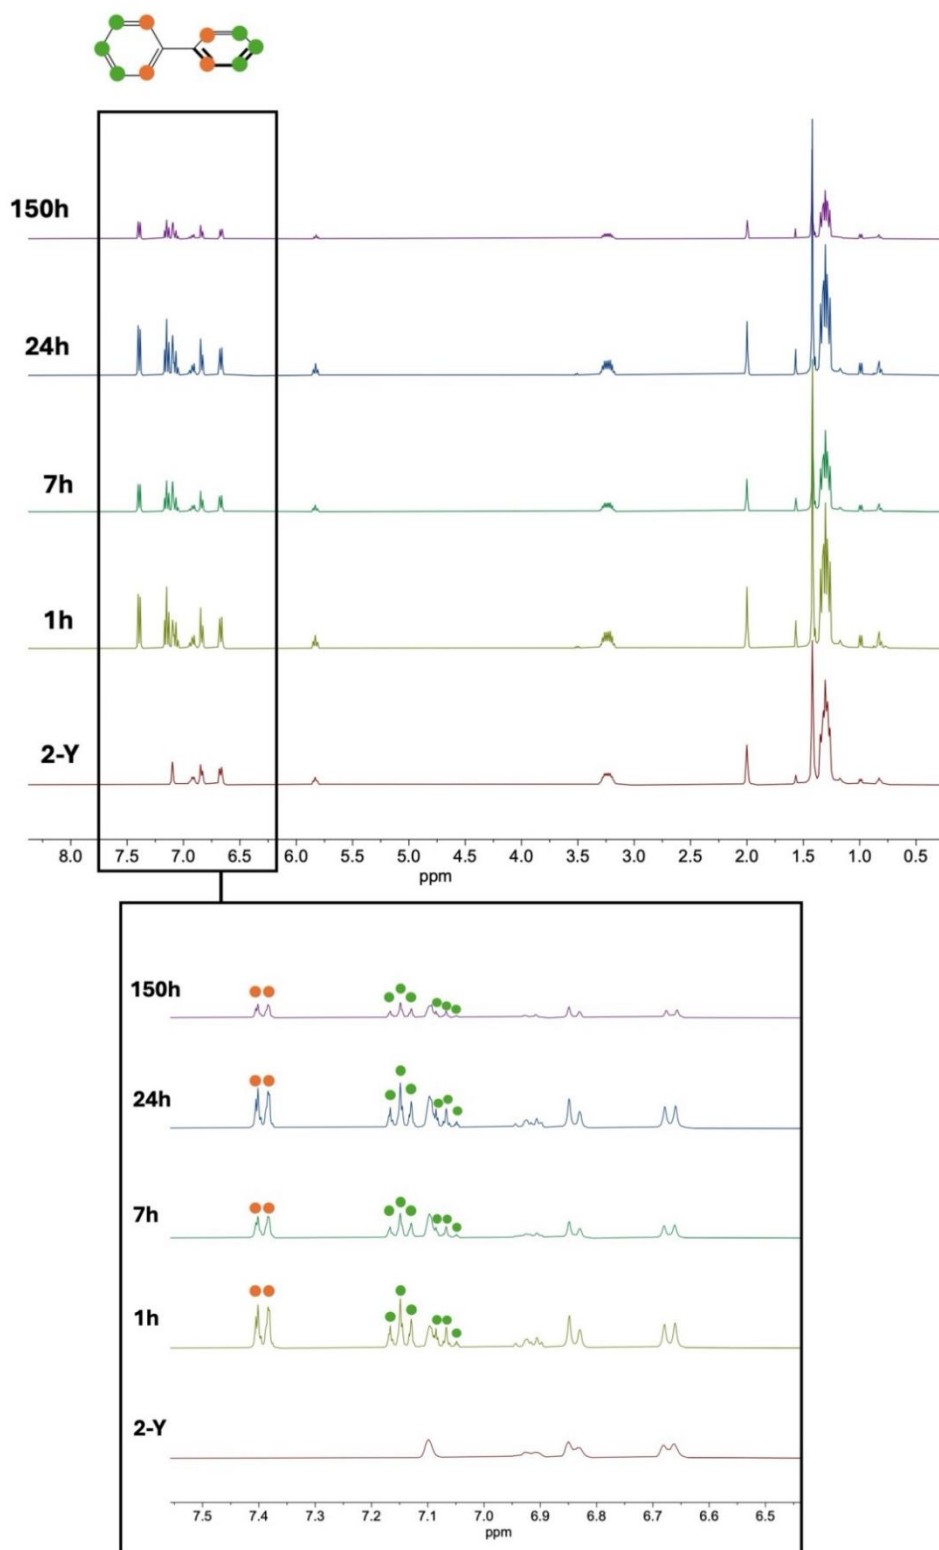

**Figure S16** Stacked <sup>1</sup>H NMR spectra showing time evolution of a 1 : 1 mixture of **2-Y** and biphenyl in C<sub>6</sub>D<sub>6</sub> at 80 °C in the region -3 to 15 ppm, zoomed in 6.5 to 7.5 ppm (bottom).

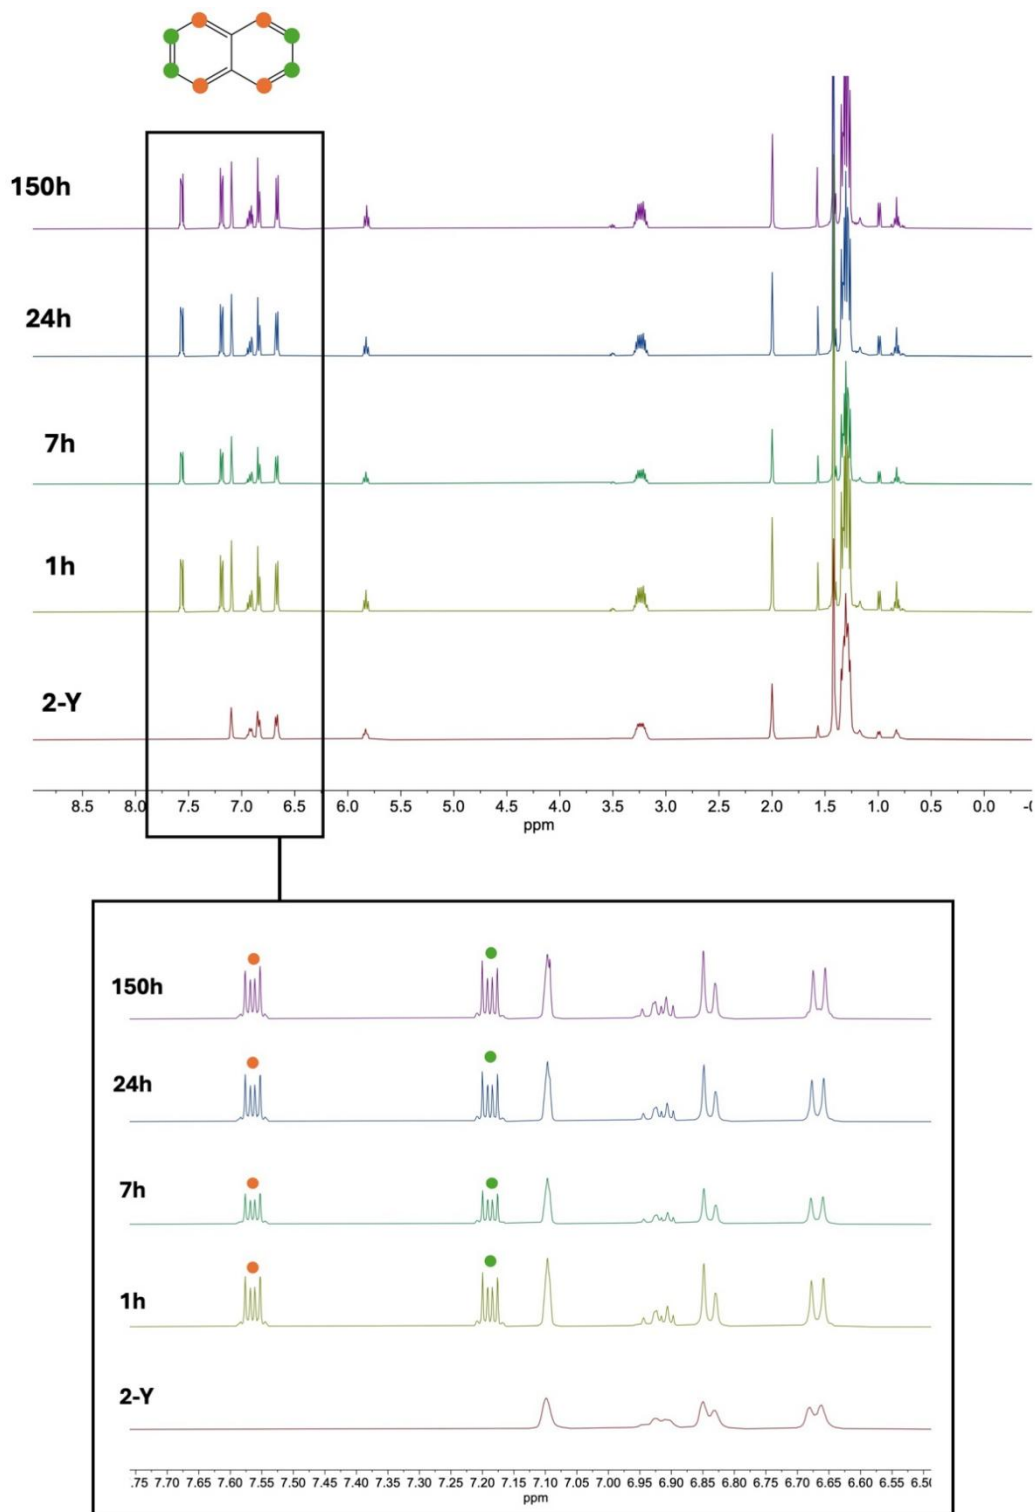

**Figure S17** Stacked <sup>1</sup>H NMR spectra showing time evolution of a 1 : 1 mixture of **2-Y** and naphthalene in C<sub>6</sub>D<sub>6</sub> in the region -3 to 15 ppm, zoomed in 6.5 to 7.8 ppm (bottom).

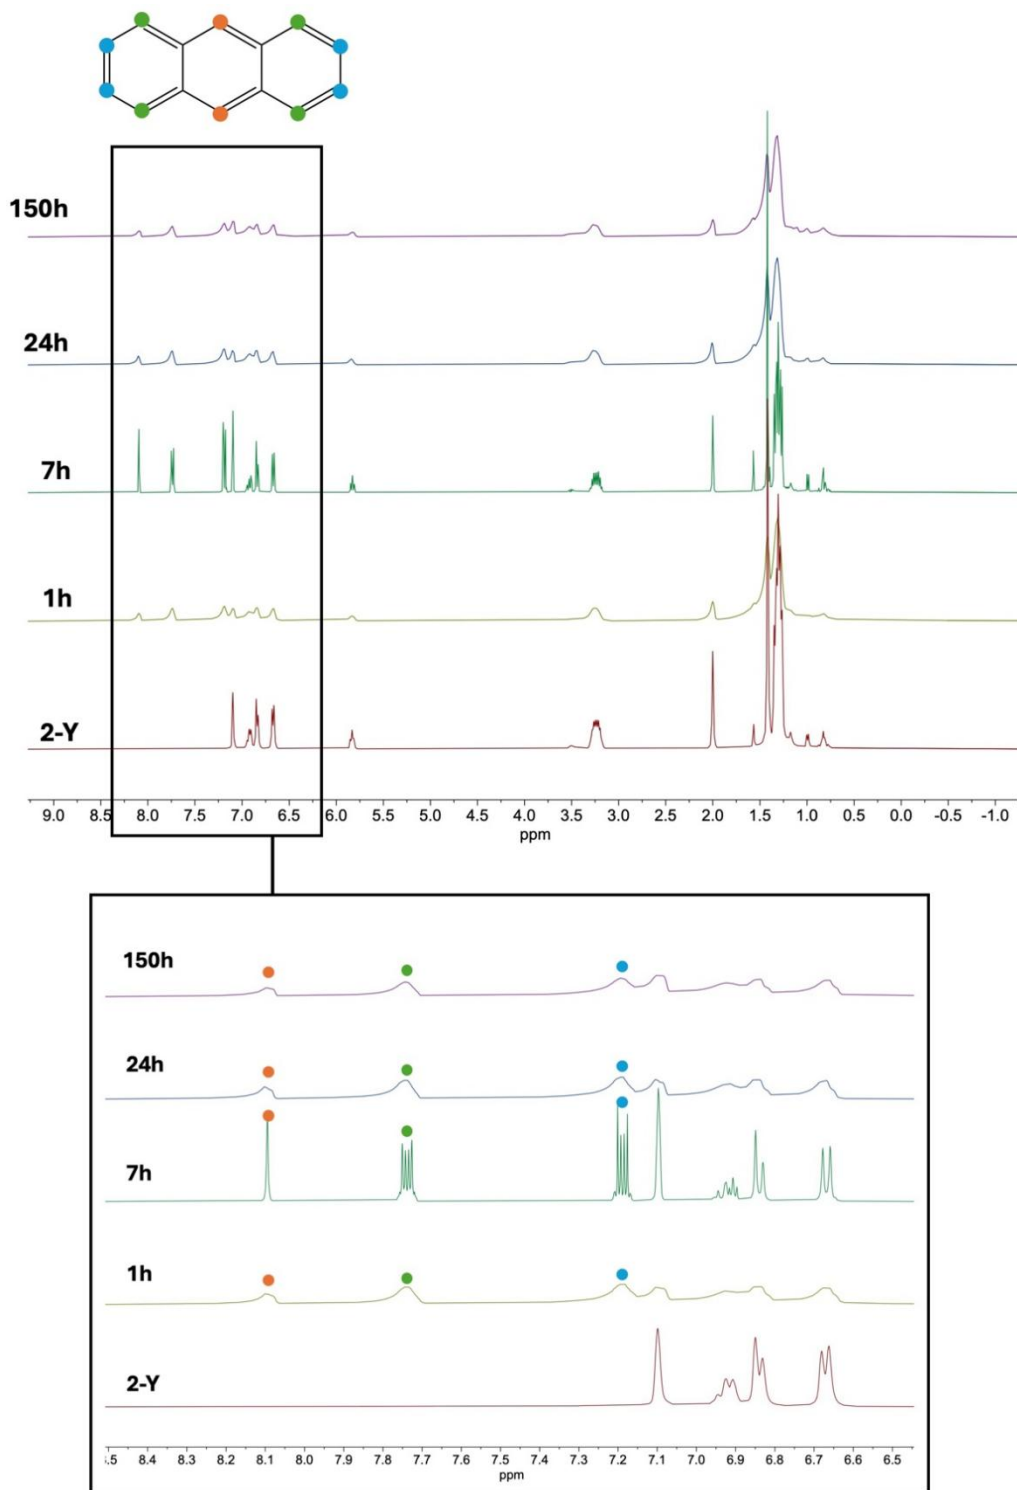

**Figure S18** Stacked <sup>1</sup>H NMR spectra showing time evolution of a 1 : 1 mixture of **2-Y** and anthracene in C<sub>6</sub>D<sub>6</sub> in the region -3 to 15 ppm, zoomed in 6.5 to 8.5 ppm (bottom).

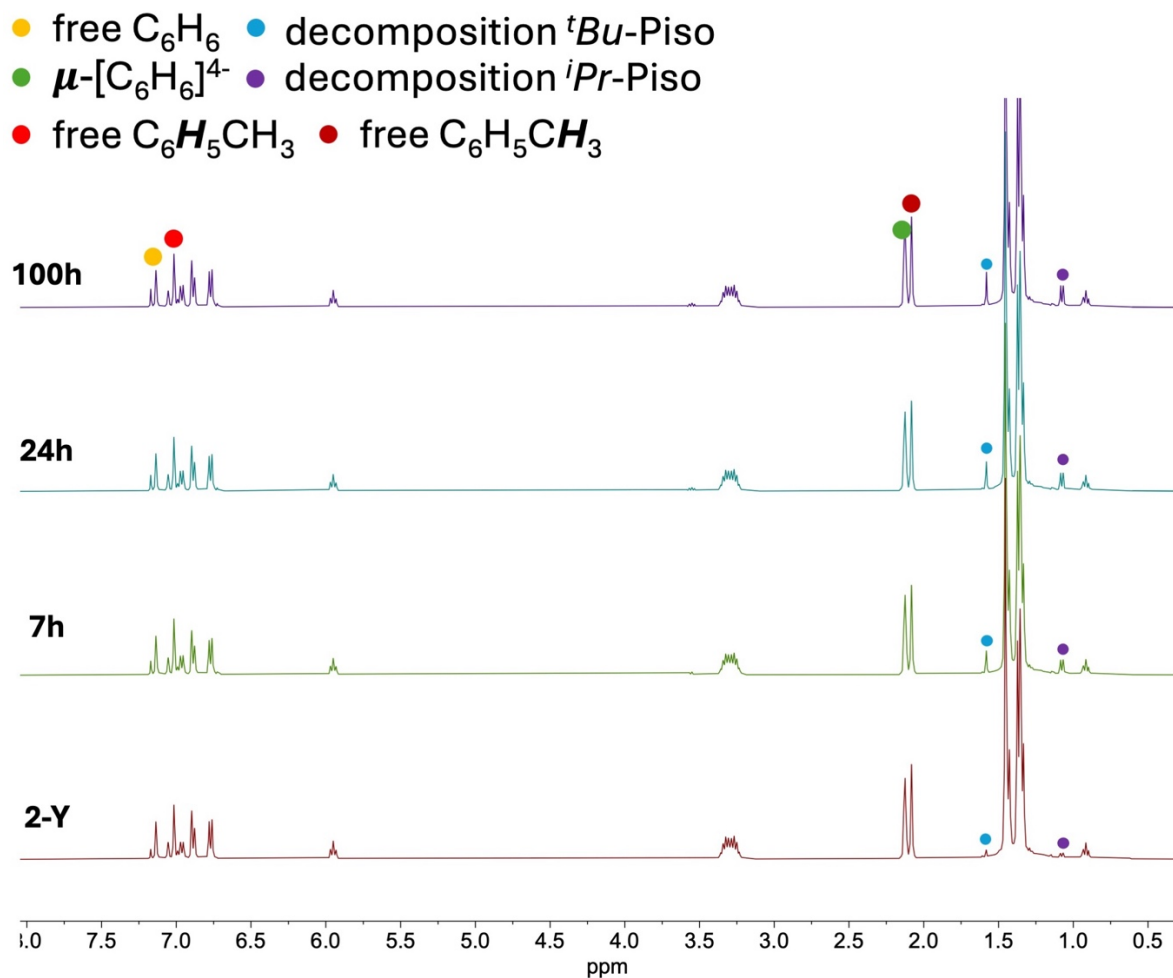

**Figure S19** Stacked  $^1H$  NMR spectra showing time evolution of a solution of **2-Y** in  $C_7D_8$  heated at  $80\text{ }^\circ C$  for up to 100 h in the region 0 to 8 ppm. No arene exchange was observed between **2-Y** and  $C_7D_8$ , just some minor decomposition.

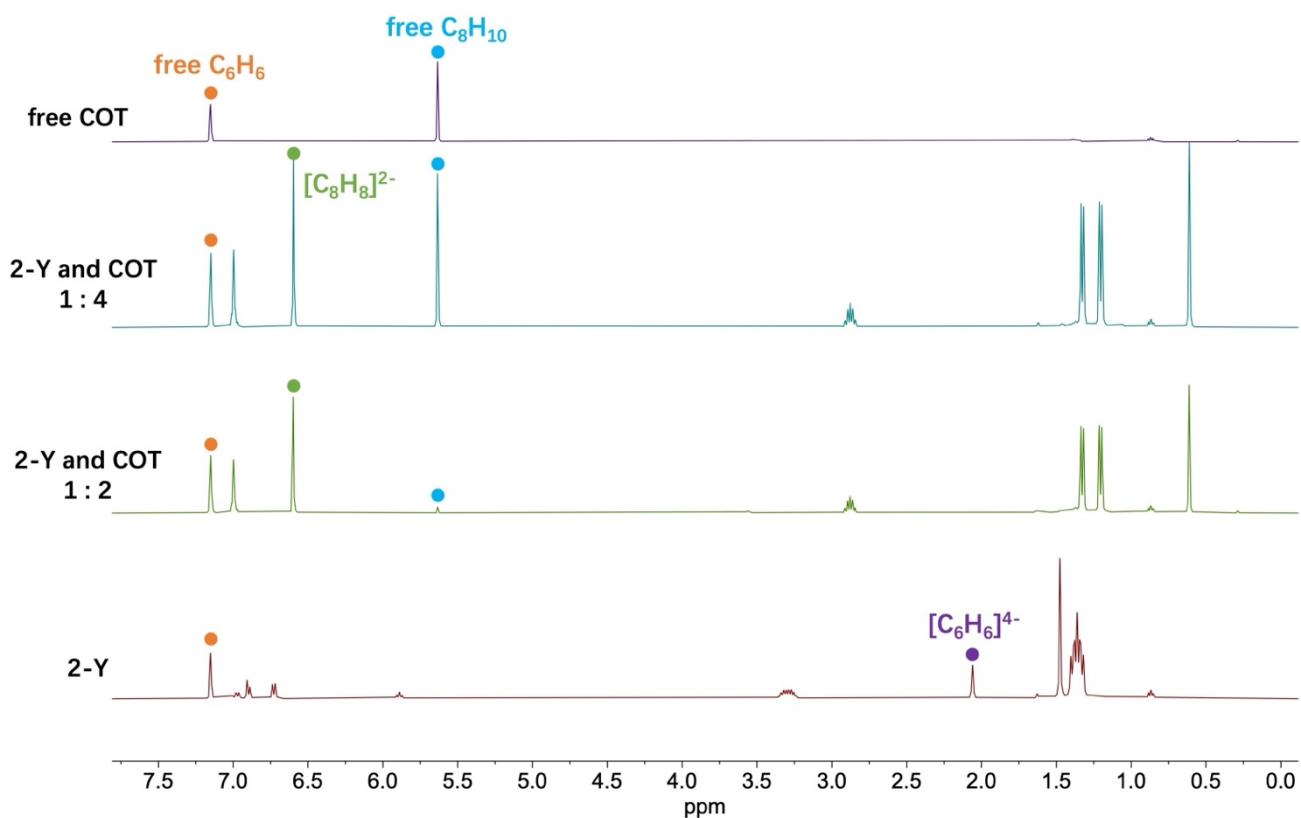

**Figure S20** Stacked <sup>1</sup>H NMR spectra of the comparison between free COT, 1 : 4 and 1 : 2 equivalent mixtures of **2-Y** and COT, and free **2-Y** in C<sub>6</sub>D<sub>6</sub> (from top to bottom) in the region 0 to 7.5 ppm.

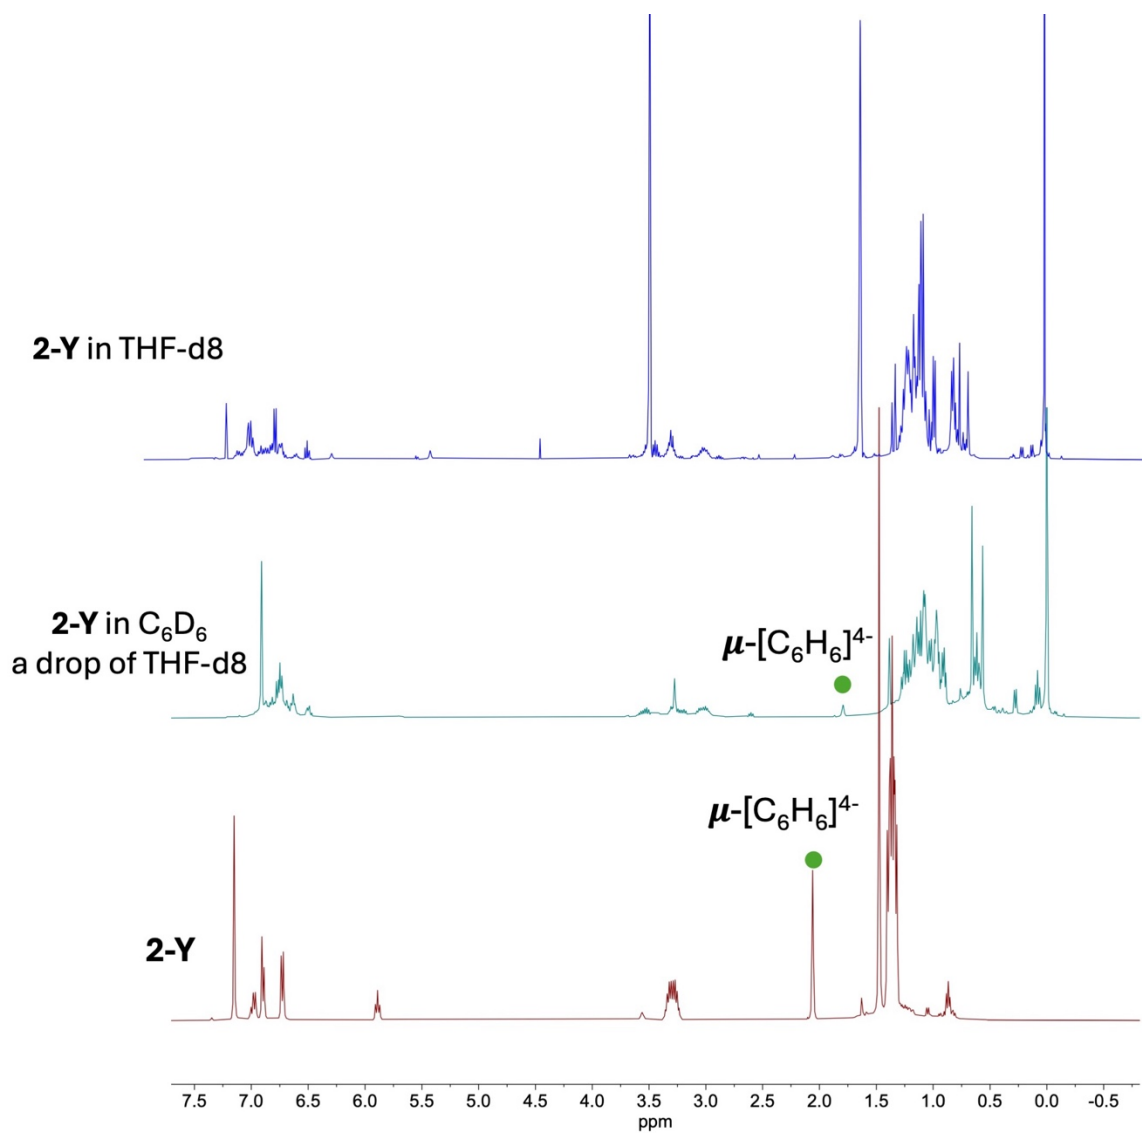

**Figure S21** Stacked  $^1\text{H}$  NMR spectra of the comparison between the reactions of **2-Y** and a drop of  $d_8$ -THF in  $\text{C}_6\text{D}_6$  or neat  $d_8$ -THF in the region 0 to 8.0 ppm.



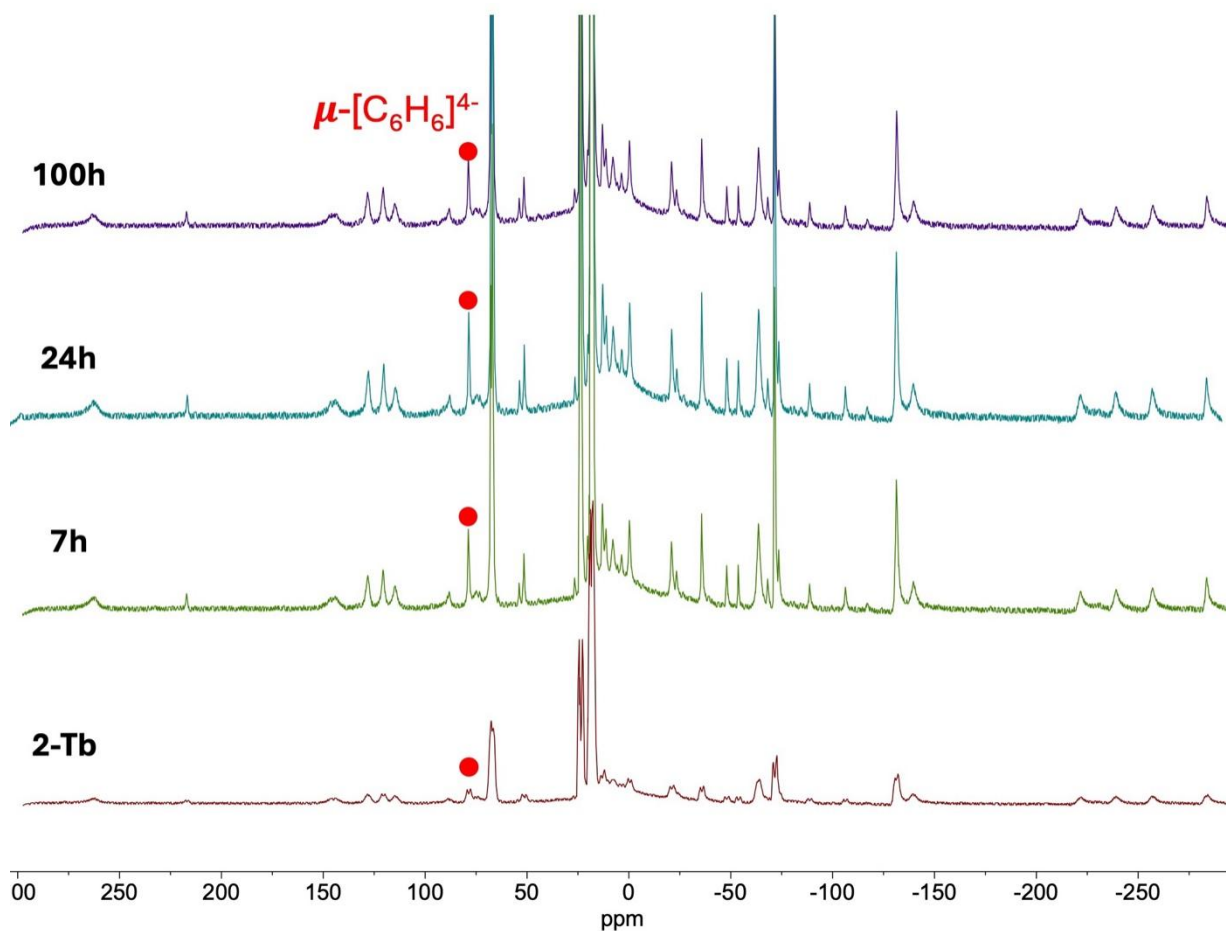

**Figure S22** Stacked <sup>1</sup>H NMR spectra showing time evolution of a solution of **2-Tb** in C<sub>7</sub>D<sub>8</sub> heated at 80 °C in the region -300 to 300 ppm. No arene exchange was observed between **2-Tb** and C<sub>7</sub>D<sub>8</sub>.

## 2. Infrared spectra

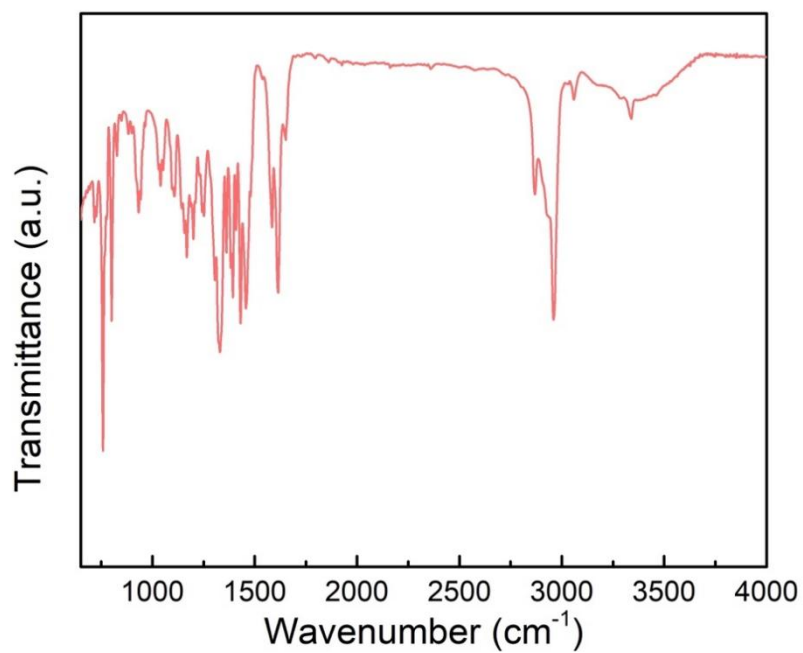

Figure S23 ATR-IR spectrum of **1-Gd-I**.

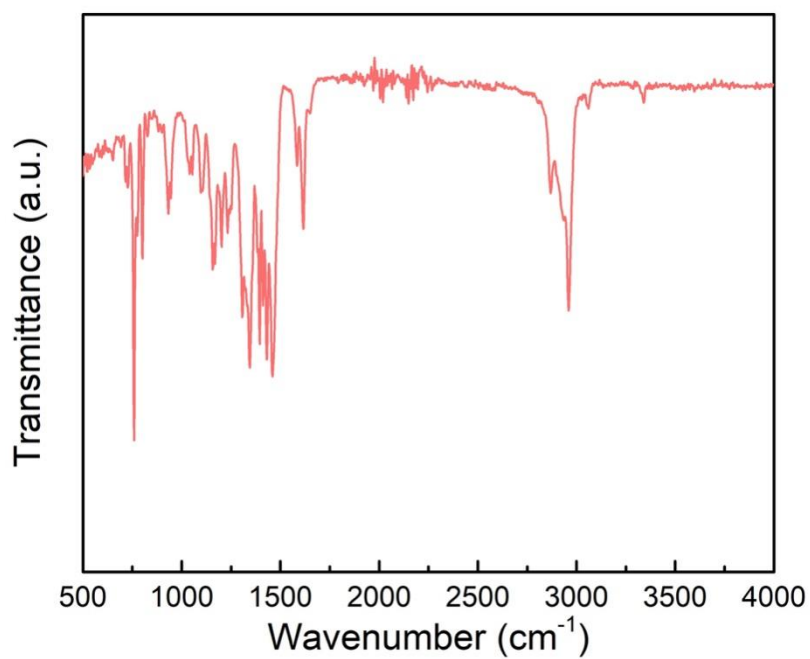

Figure S24 ATR-IR spectrum of **1-Tb-Cl**.

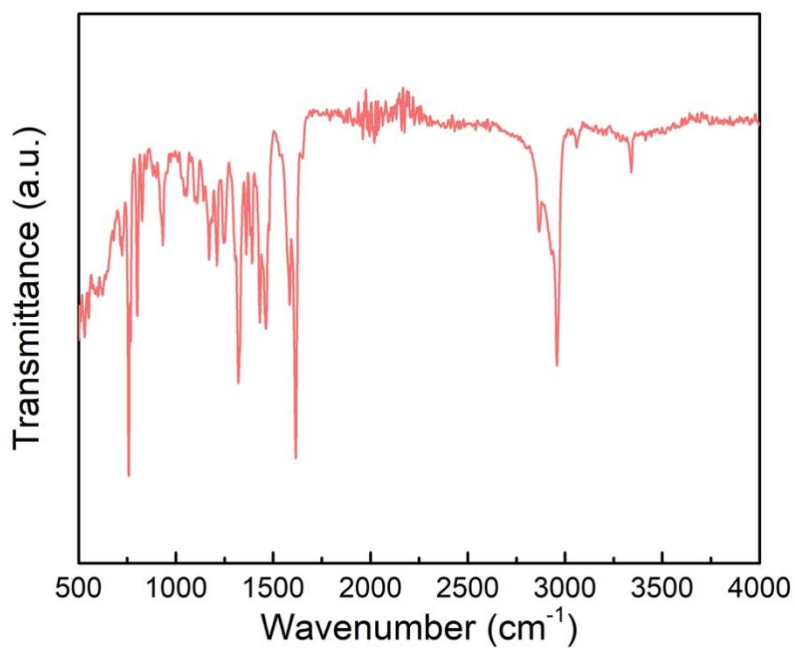

**Figure S25** ATR-IR spectrum of **1-Dy-Cl**.

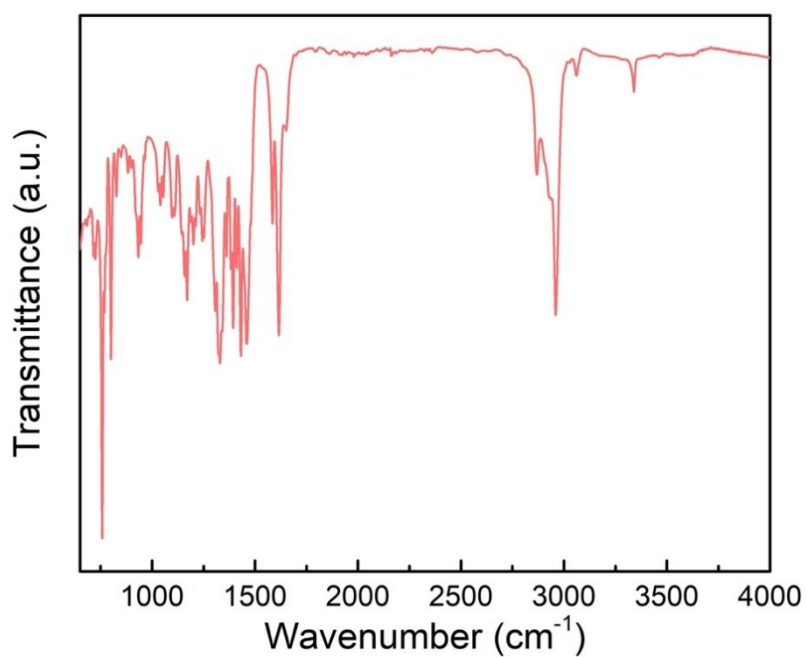

**Figure S26** ATR-IR spectrum of **1-Y-I**.

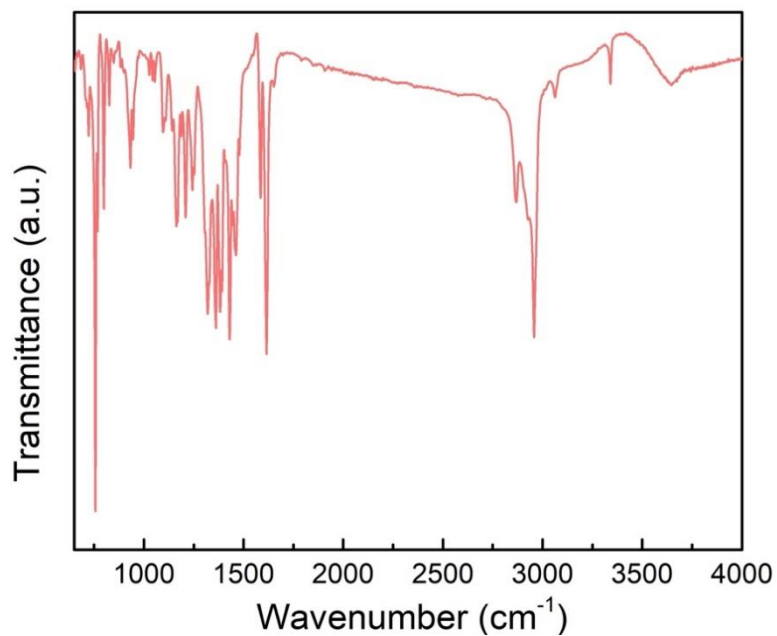

**Figure S27** ATR-IR spectrum of **2-Gd**.

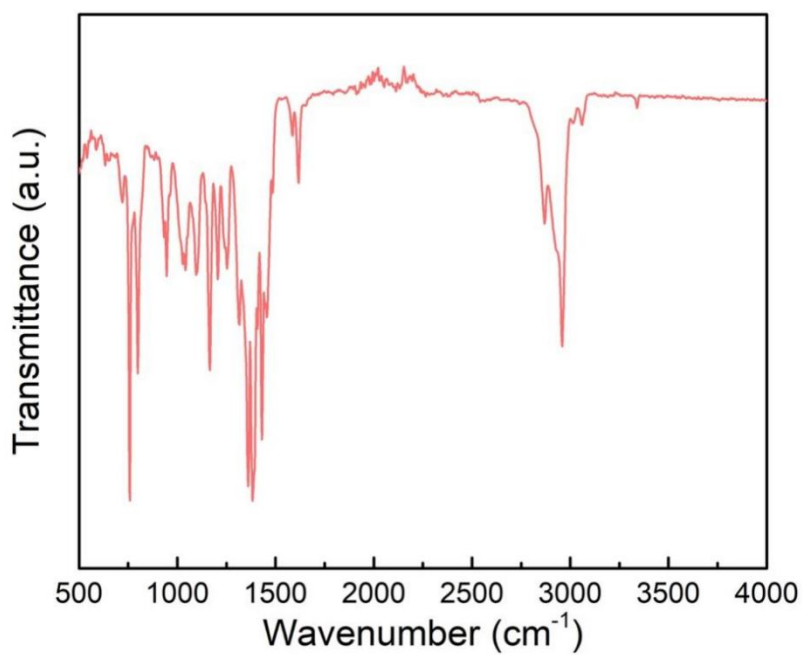

**Figure S28** ATR-IR spectrum of **2-Tb**.

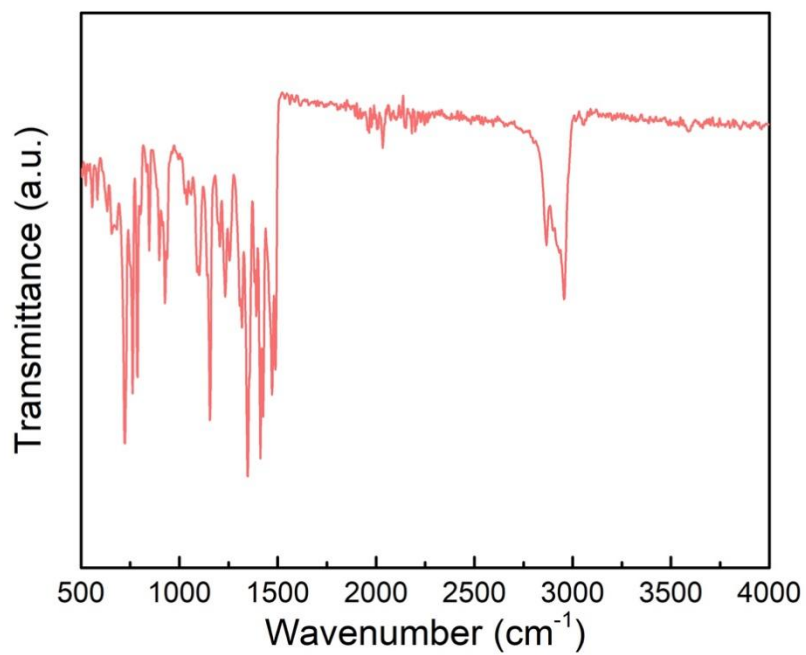

**Figure S29** ATR-IR spectrum of **2-Dy**.

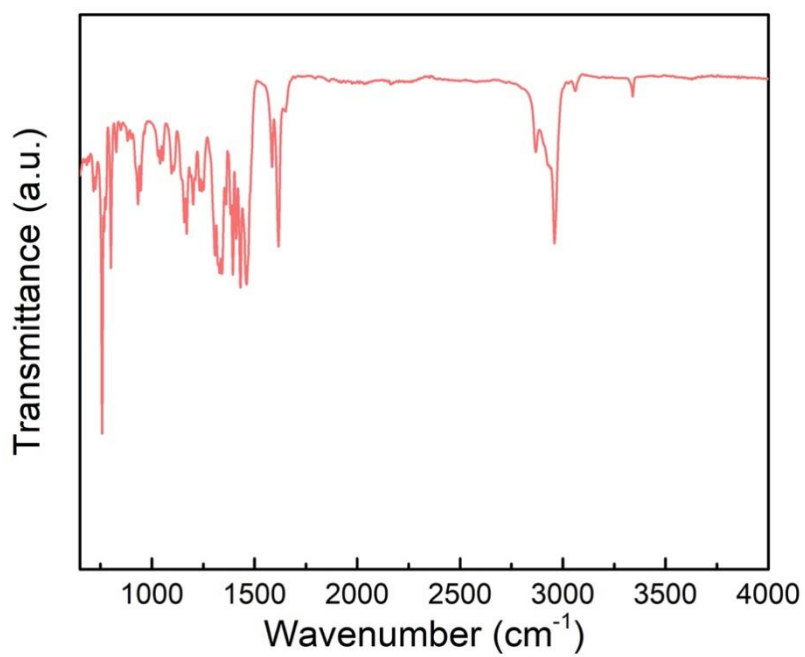

**Figure S30** ATR-IR spectrum of **2-Y**.

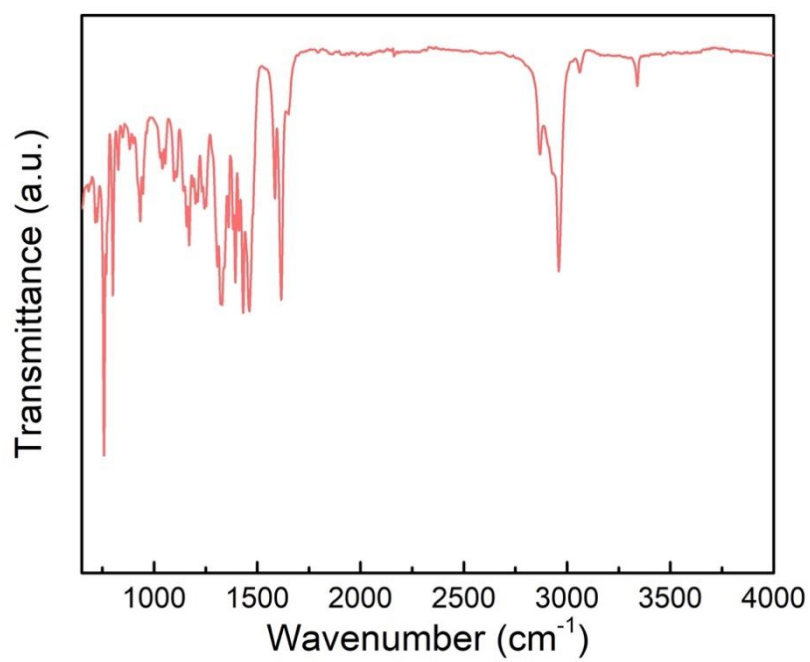

**Figure S31** ATR-IR spectrum of **3-Tb**.

### 3. UV-vis-NIR Spectroscopy

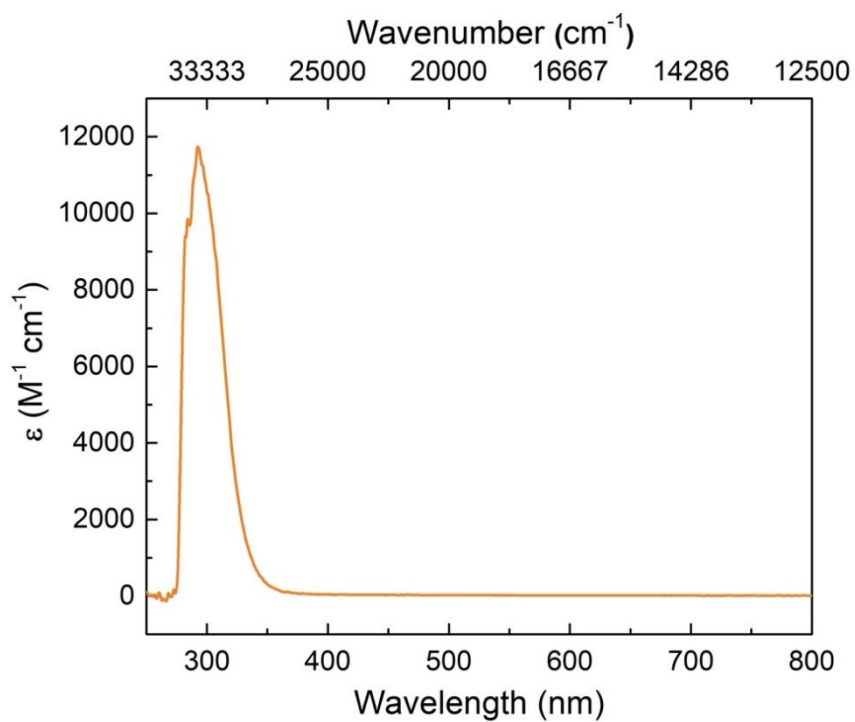

**Figure S32** UV-Vis-NIR spectrum of **1-Gd-I** in benzene 0.2 mM.

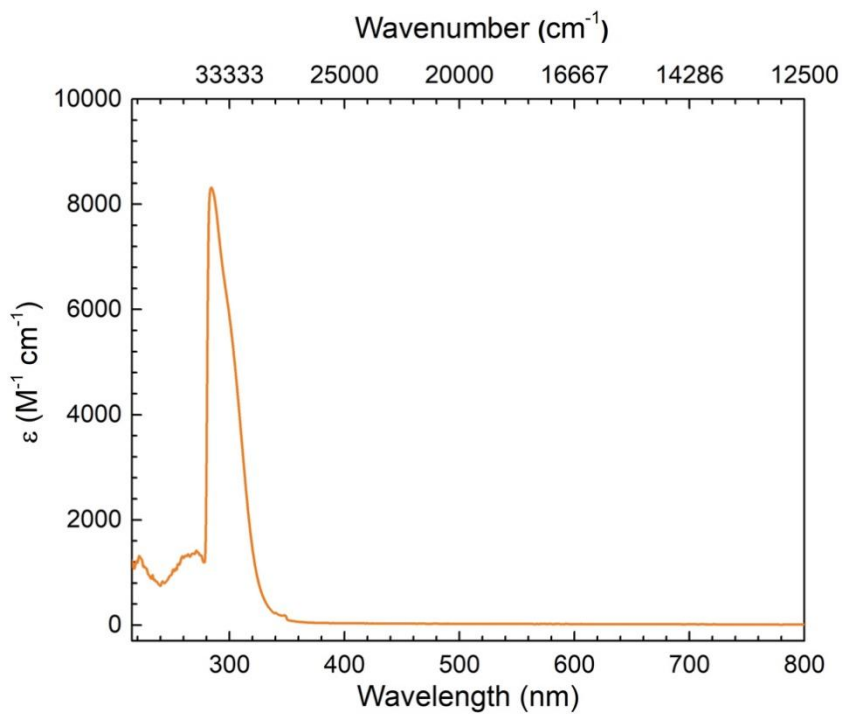

**Figure S33** UV-Vis-NIR spectrum of **1-Tb-Cl** in benzene 0.2 mM.

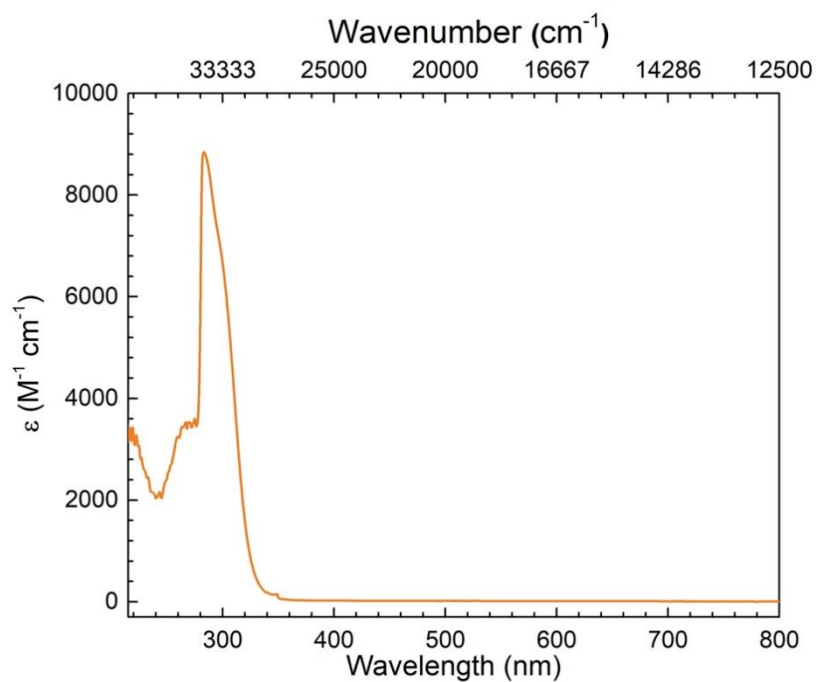

**Figure S34** UV-Vis-NIR spectrum of **1-Dy-Cl** in benzene 0.2 mM.

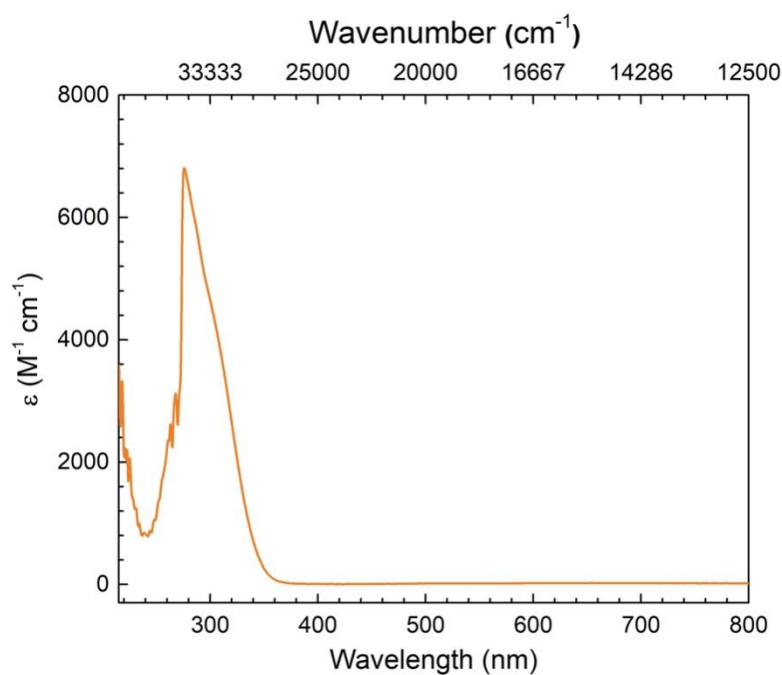

**Figure S35** UV-Vis-NIR spectrum of **1-Y-I** in benzene 0.23 mM.



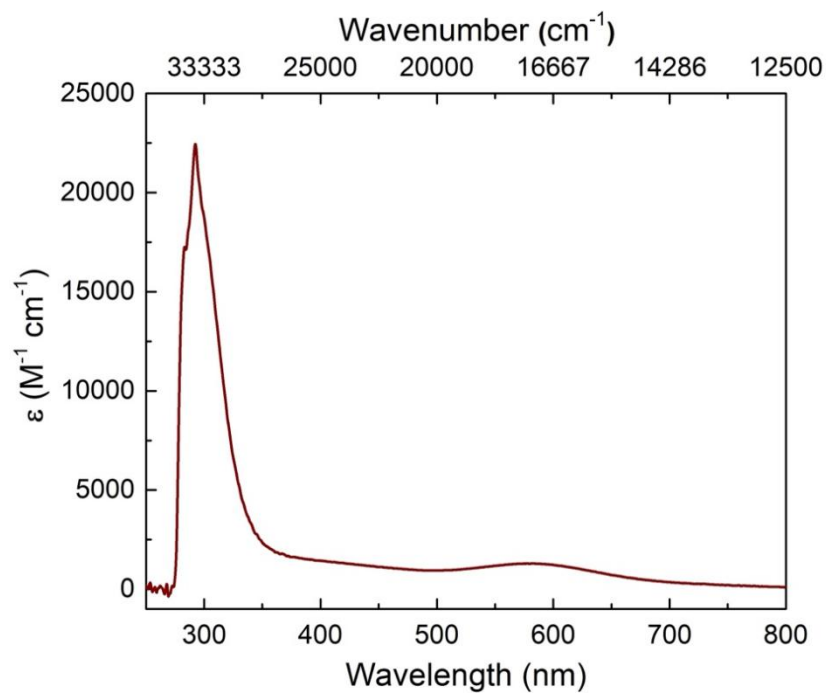

**Figure S36** UV-Vis-NIR spectrum of **2-Gd** in benzene 0.08 mM.

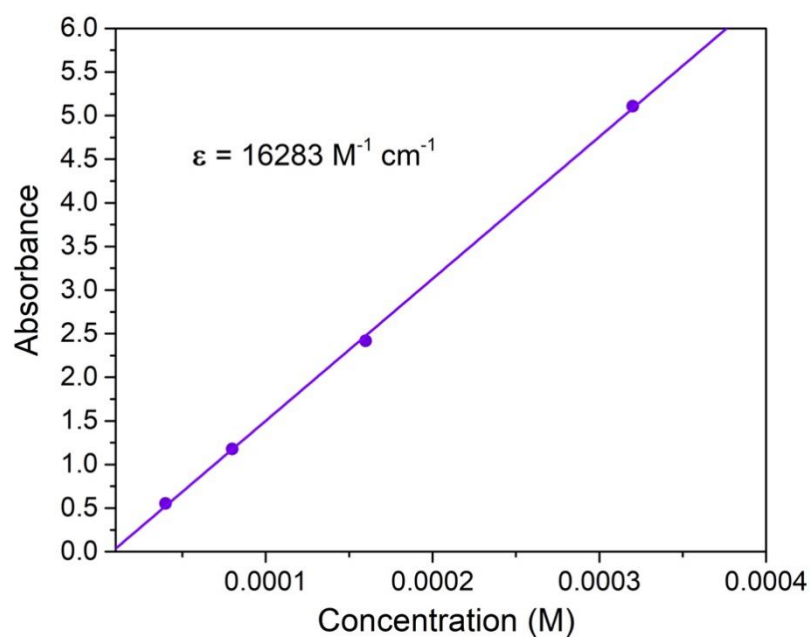

**Figure S37** Plot of absorbance versus concentration for the feature at 281 nm in the UV-Vis-NIR spectra of **2-Tb** in benzene. Purple points represent experimental data and the purple line represents the fit to the data used to extract the extinction coefficient.

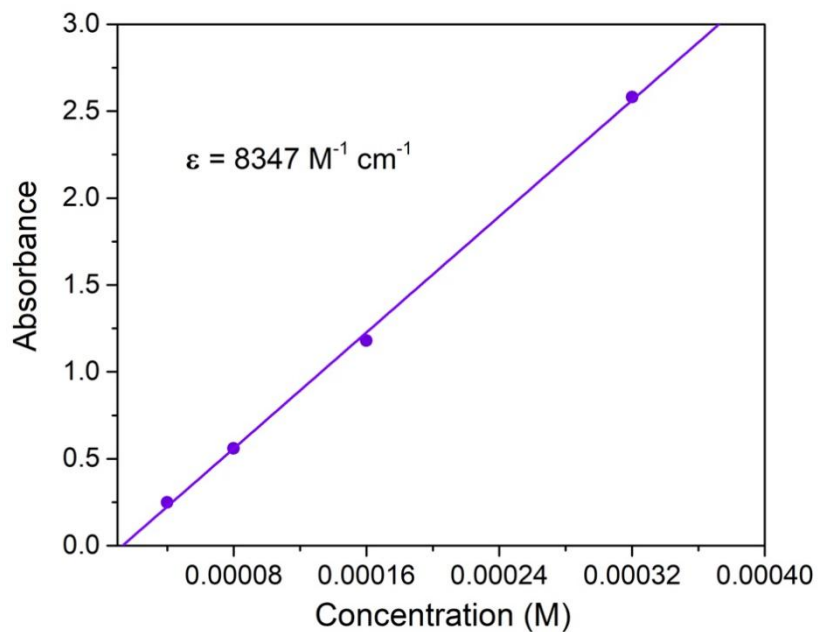

**Figure S38** Plot of absorbance versus concentration for the feature at 582 nm in the UV-Vis-NIR spectra of **2-Tb** in benzene. Purple points represent experimental data and the purple line represents the fit to the data used to extract the extinction coefficient.

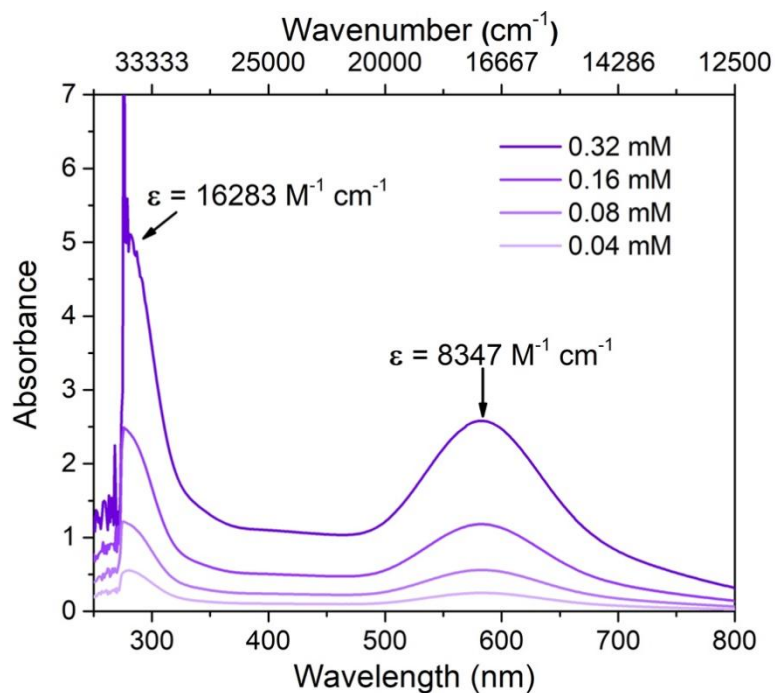

**Figure S39** UV-Vis-NIR spectra of **2-Tb** in benzene with varied concentration.

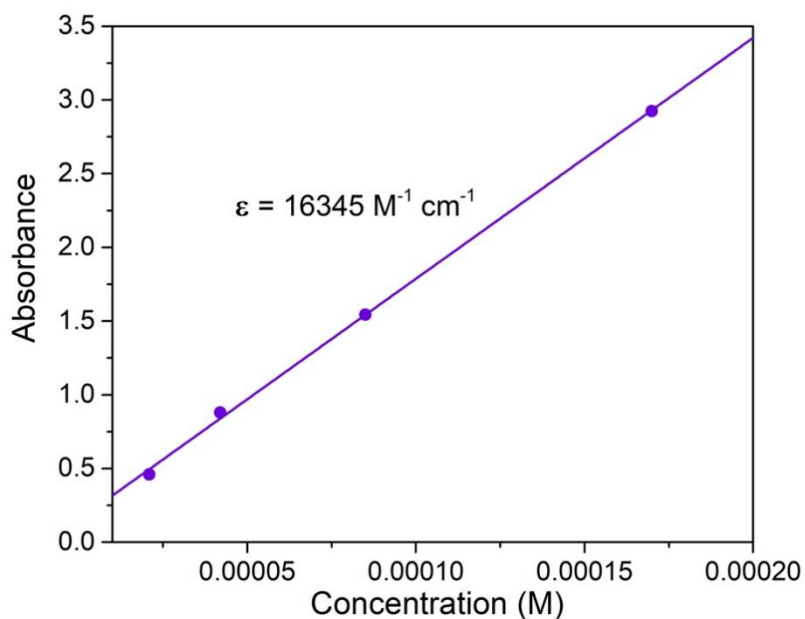

**Figure S40** Plot of absorbance versus concentration for the feature at 277 nm in the UV-Vis-NIR spectra of **2-Tb** in hexane. Purple points represent experimental data and the purple line represents the fit to the data used to extract the extinction coefficient.

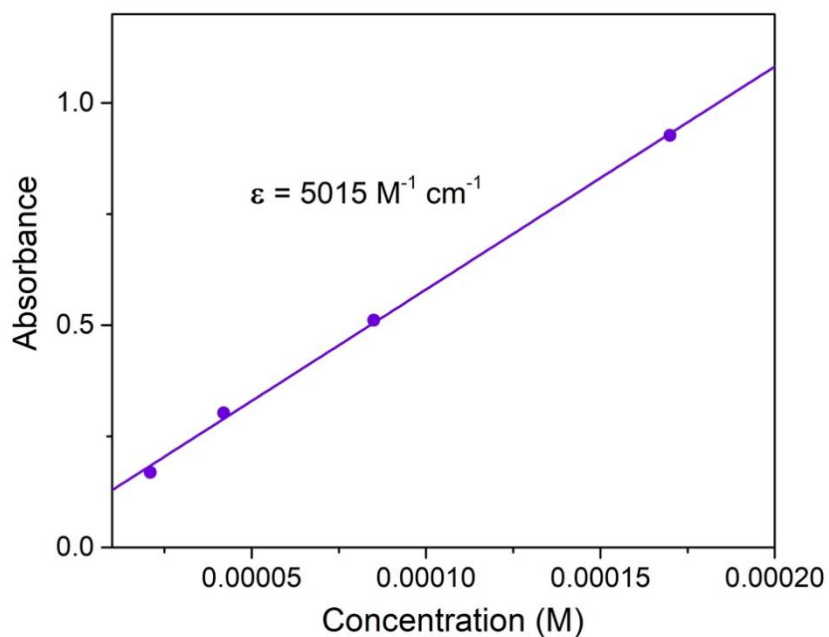

**Figure S41** Plot of absorbance versus concentration for the feature at 578 nm in the UV-Vis-NIR spectra of **2-Tb** in hexane. Purple points represent experimental data and the purple line represents the fit to the data used to extract the extinction coefficient.

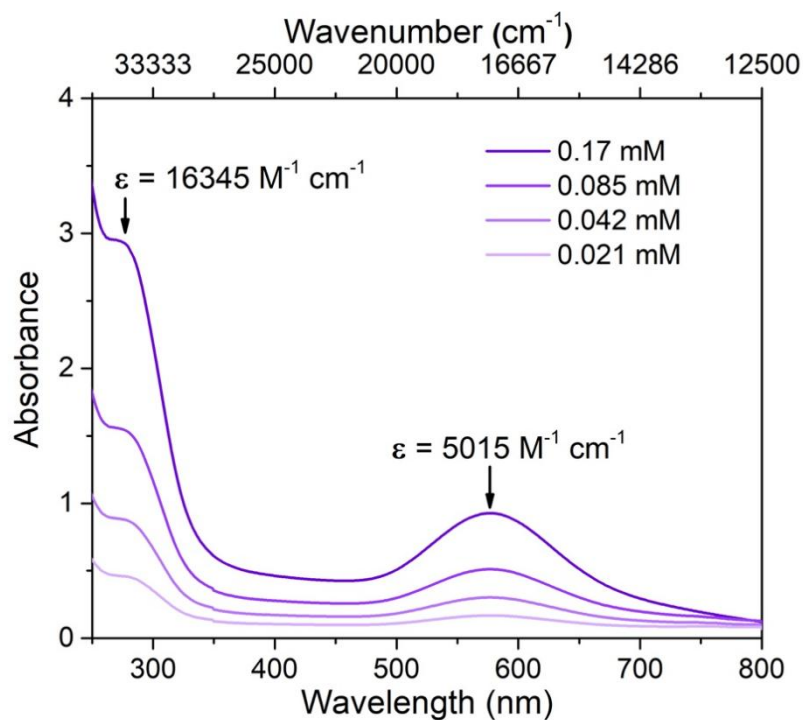

**Figure S42** UV-Vis-NIR spectra of **2-Tb** in hexane with varied concentration.

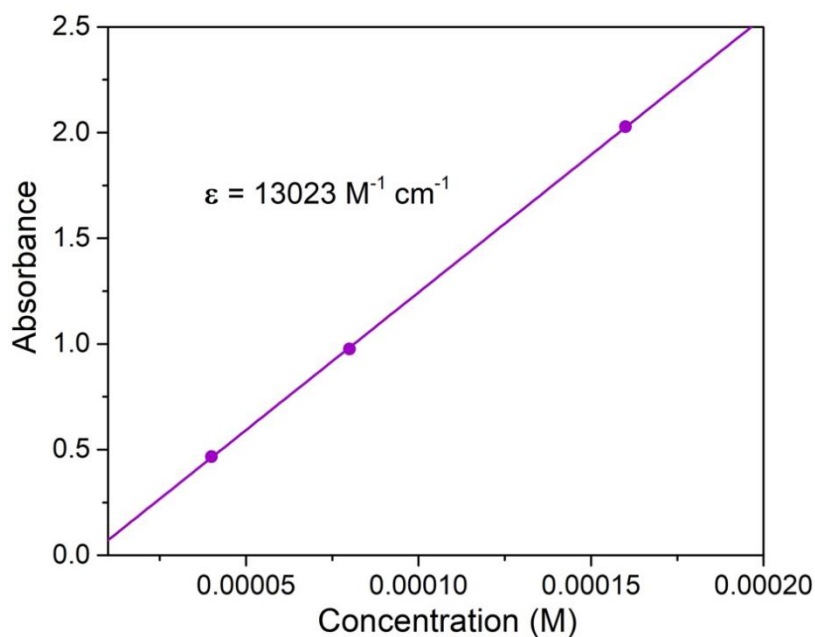

**Figure S43** Plot of absorbance versus concentration for the feature at 279 nm in the UV-Vis-NIR spectra of **2-Dy** in benzene. Purple points represent experimental data and the purple line represents the fit to the data used to extract the extinction coefficient.

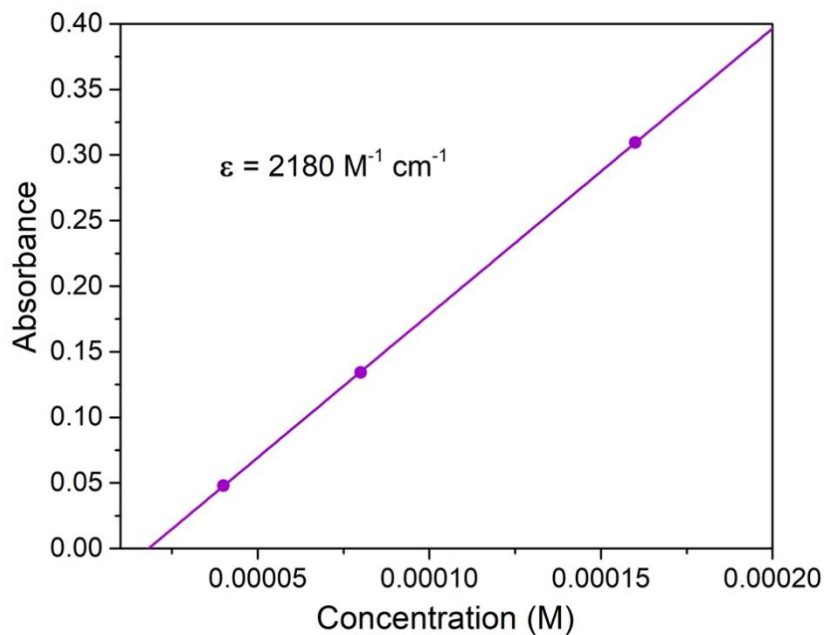

**Figure S44** Plot of absorbance versus concentration for the feature at 572 nm in the UV-Vis-NIR spectra of **2-Dy** in benzene. Purple points represent experimental data and the purple line represents the fit to the data used to extract the extinction coefficient.

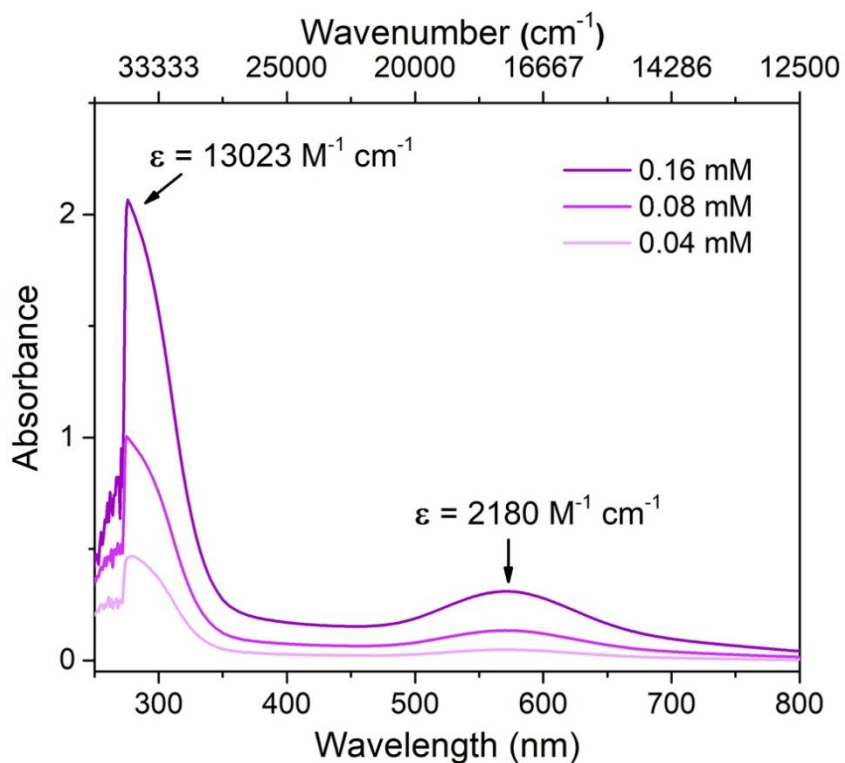

**Figure S45** UV-Vis-NIR spectra of **2-Dy** in benzene with varied concentration.

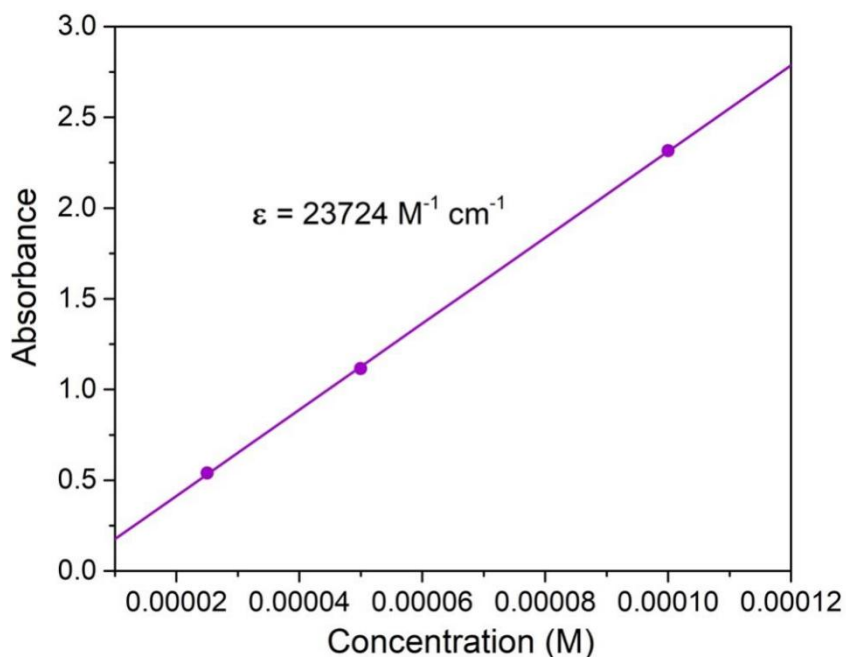

**Figure S46** Plot of absorbance versus concentration for the feature at 269 nm in the UV-Vis-NIR spectra of **2-Dy** in hexane. Violet points represent experimental data and the violet line represents the fit to the data used to extract the extinction coefficient.

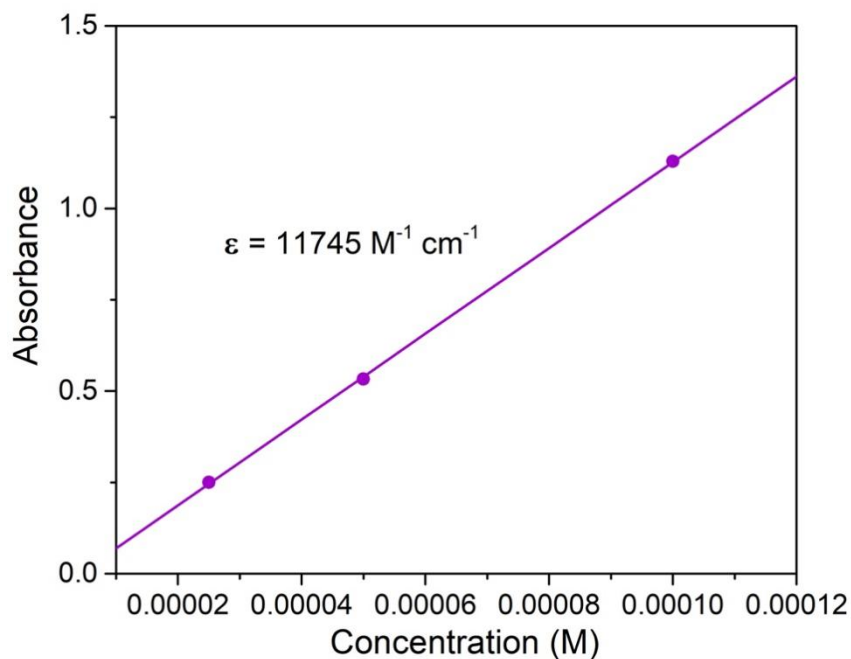

**Figure S47** Plot of absorbance versus concentration for the feature at 566 nm in the UV-Vis-NIR spectra of **2-Dy** in hexane. Violet points represent experimental data and the violet line represents the fit to the data used to extract the extinction coefficient.

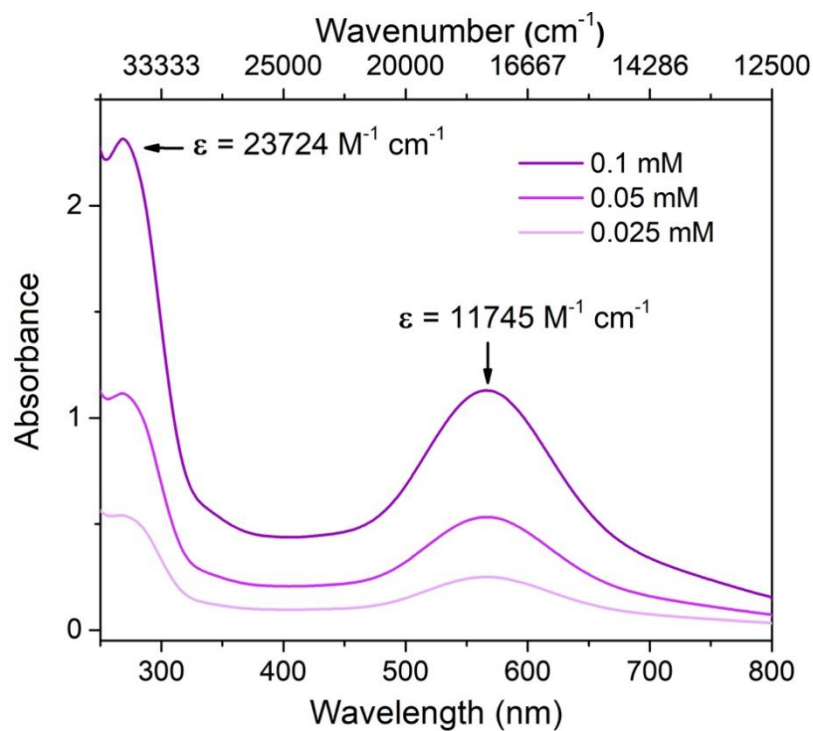

**Figure S48** UV-Vis-NIR spectra of **2-Dy** in hexane with varied concentration.

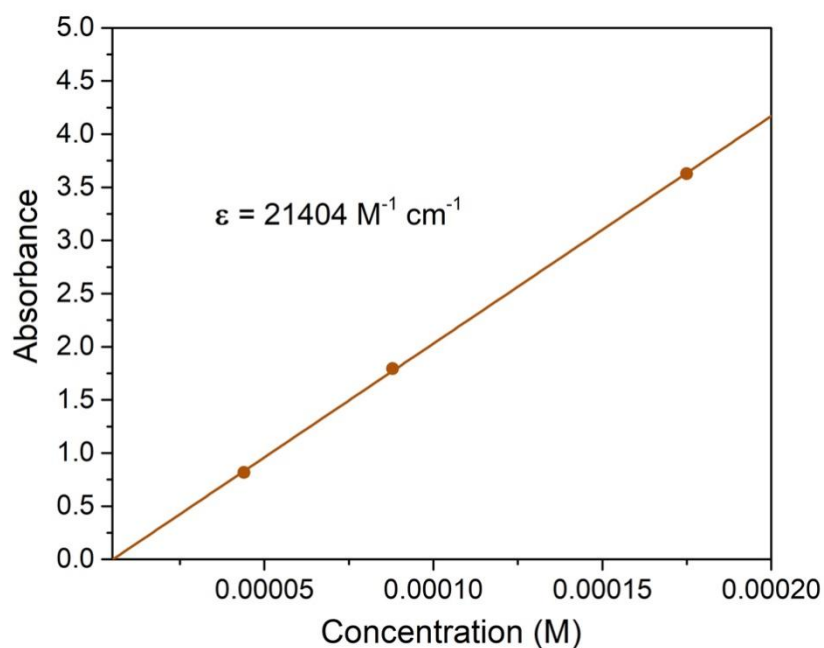

**Figure S49** Plot of absorbance versus concentration for the feature at 278 nm in the UV-Vis-NIR spectra of **2-Y** in benzene. brown points represent experimental data and the brown line represents the fit to the data used to extract the extinction coefficient.

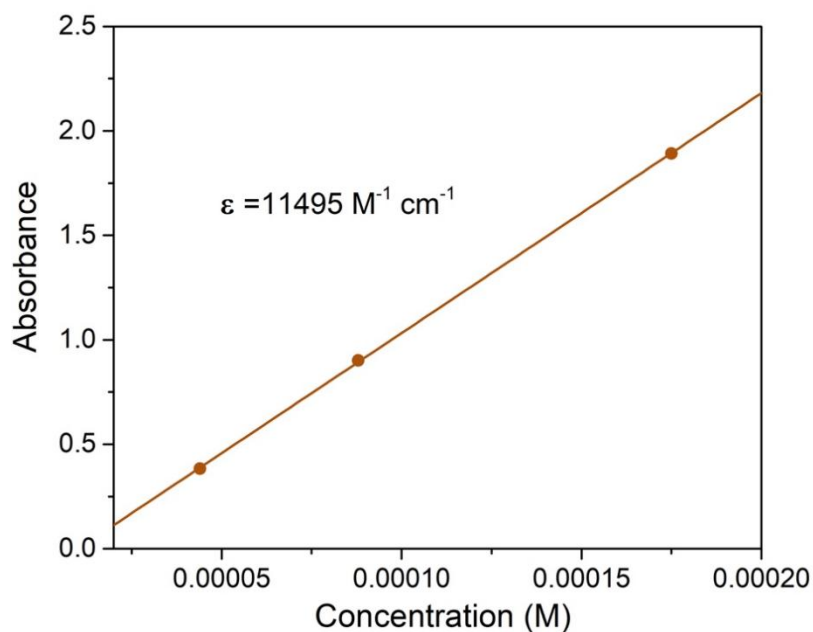

**Figure S50** Plot of absorbance versus concentration for the feature at 583 nm in the UV-Vis-NIR spectra of **2-Y** in benzene. brown points represent experimental data and the brown line represents the fit to the data used to extract the extinction coefficient.

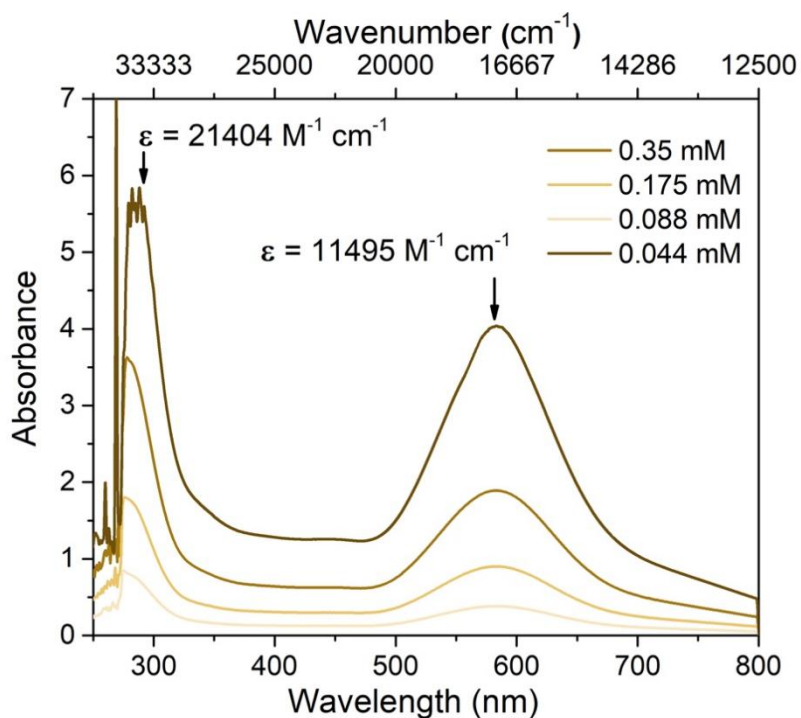

**Figure S51** UV-Vis-NIR spectra of **2-Y** in benzene with varied concentration.



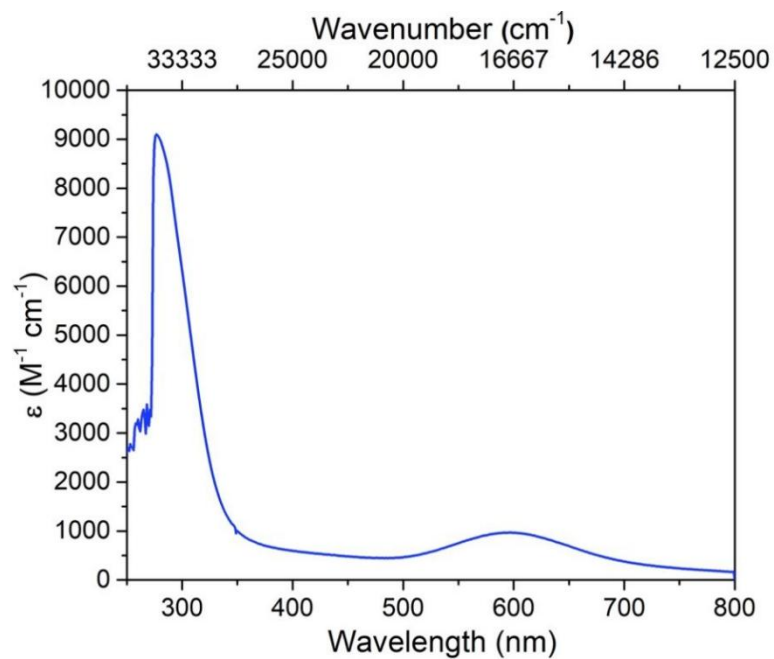

**Figure S52** UV-Vis-NIR spectra of **3-Tb** in benzene 0.14 mM.

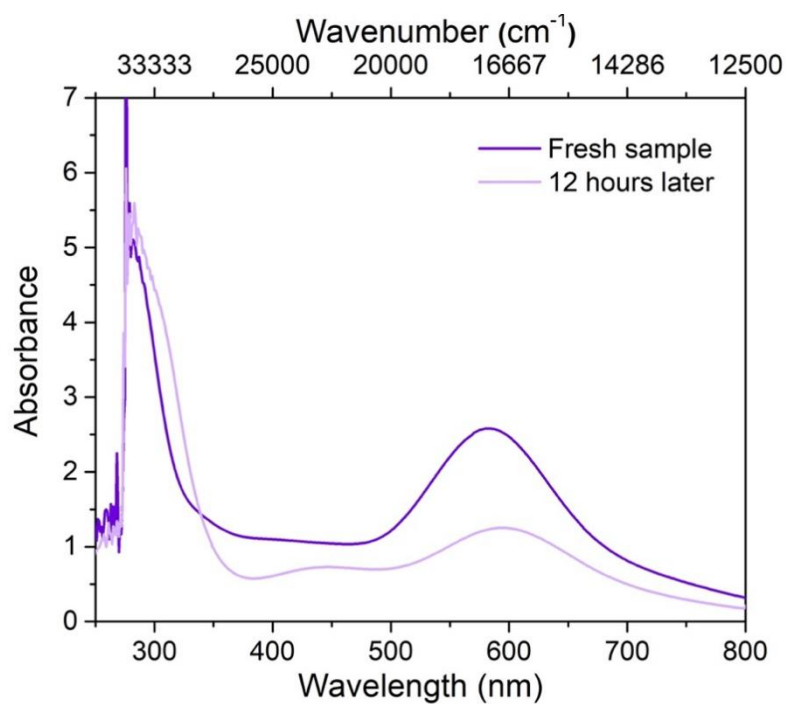

**Figure S53** UV-Vis-NIR spectra to compare a fresh solution of **2-Tb** in benzene at room temperature, and aged samples after 12 hour at 80 °C.

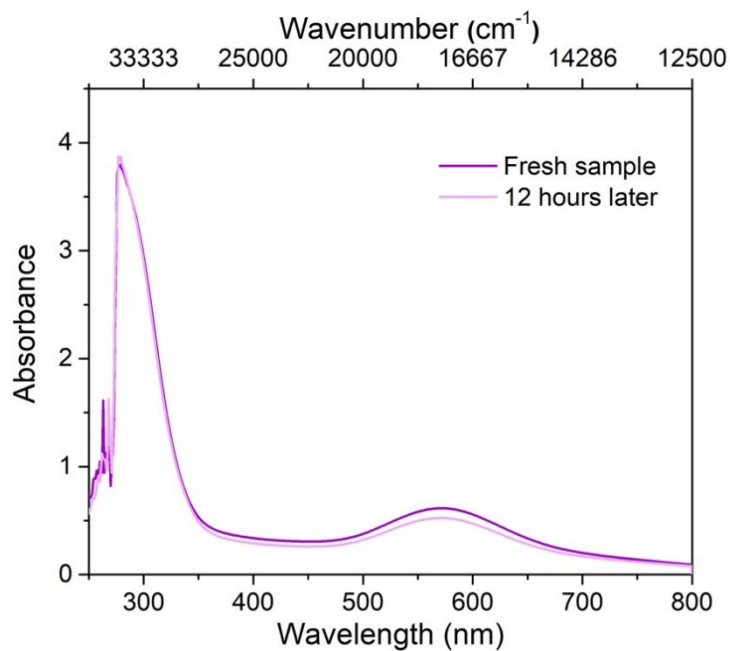

**Figure S54** UV-Vis-NIR spectra to compare a fresh solution of **2-Dy** in benzene at room temperature, and aged samples after 12 hour at 80 °C.

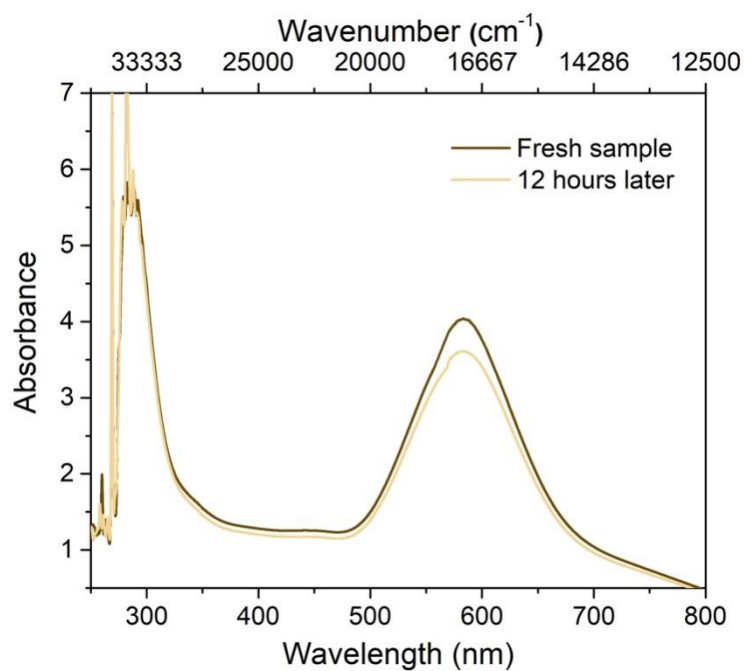

**Figure S55** UV-Vis-NIR spectra to compare a fresh solution of **2-Y** in benzene at room temperature, and aged samples after 12 hour at 80 °C.

## 4. Crystallography

**Table S1** Selected crystallographic data for **1-Gd-I**, **1-Tb-Cl** and **1-Dy-Cl**.

| Compounds                                                                     | 1-Gd-I                                                             | 1-Tb-Cl                                                            | 1-Dy-Cl                                                            |
|-------------------------------------------------------------------------------|--------------------------------------------------------------------|--------------------------------------------------------------------|--------------------------------------------------------------------|
| Formula                                                                       | C <sub>65</sub> H <sub>94</sub> GdIN <sub>4</sub>                  | C <sub>58</sub> H <sub>86</sub> ClN <sub>4</sub> Tb                | C <sub>58</sub> H <sub>86</sub> ClN <sub>4</sub> Dy                |
| <i>M</i> , g mol <sup>-1</sup>                                                | 1215.59                                                            | 1033.67                                                            | 1037.24                                                            |
| Temperature, K                                                                | 150.00(10)                                                         | 100.15(10)                                                         | 100.01(10)                                                         |
| Space group                                                                   | <i>C2/c</i>                                                        | <i>C2/c</i>                                                        | <i>C2/c</i>                                                        |
| <i>a</i> , Å                                                                  | 26.171(2)                                                          | 23.9599(8)                                                         | 23.9612(13)                                                        |
| <i>b</i> , Å                                                                  | 11.0443(10)                                                        | 10.5837(2)                                                         | 10.5893(4)                                                         |
| <i>c</i> , Å                                                                  | 23.940(3)                                                          | 22.4979(8)                                                         | 22.5423(13)                                                        |
| $\alpha$ , deg                                                                | 90                                                                 | 90                                                                 | 90                                                                 |
| $\beta$ , deg                                                                 | 119.762(3)                                                         | 112.183(4)                                                         | 112.235(6)                                                         |
| $\gamma$ , deg                                                                | 90                                                                 | 90                                                                 | 90                                                                 |
| <i>V</i> , Å <sup>3</sup>                                                     | 6007.0(11)                                                         | 5282.8(3)                                                          | 5294.4(5)                                                          |
| <i>Z</i>                                                                      | 4                                                                  | 4                                                                  | 4                                                                  |
| <i>d</i> <sub>cal</sub> , g cm <sup>-3</sup>                                  | 1.344                                                              | 1.300                                                              | 1.301                                                              |
| Radiation                                                                     | MoK $\alpha$<br>( $\lambda$ = 0.71073)                             | MoK $\alpha$<br>( $\lambda$ = 0.71073)                             | MoK $\alpha$<br>( $\lambda$ = 0.71073)                             |
| 2 $\theta$ range, deg                                                         | 4.1 to 50.706                                                      | 6.722 to 58.088                                                    | 6.722 to 58.328                                                    |
| <i>R</i> <sub>int</sub>                                                       | 0.0762                                                             | 0.0389                                                             | 0.0534                                                             |
| Final indexes [ <i>F</i> <sup>2</sup> > 2 $\sigma$ ( <i>F</i> <sup>2</sup> )] | <i>R</i> <sub>1</sub> = 0.0254,<br><i>wR</i> <sub>2</sub> = 0.0584 | <i>R</i> <sub>1</sub> = 0.0400,<br><i>wR</i> <sub>2</sub> = 0.0735 | <i>R</i> <sub>1</sub> = 0.0498,<br><i>wR</i> <sub>2</sub> = 0.1084 |
| <i>R</i> indexes (all data)                                                   | <i>R</i> <sub>1</sub> = 0.0288,<br><i>wR</i> <sub>2</sub> = 0.0607 | <i>R</i> <sub>1</sub> = 0.0480,<br><i>wR</i> <sub>2</sub> = 0.0788 | <i>R</i> <sub>1</sub> = 0.0604,<br><i>wR</i> <sub>2</sub> = 0.1165 |
| <i>S</i> <sup>a</sup>                                                         | 1.038                                                              | 1.045                                                              | 1.015                                                              |
| Residual map, e Å <sup>-3</sup>                                               | 0.36/-0.30                                                         | 1.28/-1.01                                                         | 2.08/-1.55                                                         |

<sup>a</sup> Conventional  $R = \sum ||F_o| - |F_c|| / \sum |F_o|$ ;  $R_w = [\sum w(F_o^2 - F_c^2)^2 / \sum w(F_o^2)^2]^{1/2}$ ;  $S = [\sum w(F_o^2 - F_c^2)^2 / \text{no. data} - \text{no. params}]^{1/2}$  for all data.

**Table S2** Selected crystallographic data for **1-Y-I**, **2-Gd** and **2-Tb**.

| Compounds                                                            | 1-Y-I                                                              | 2-Gd                                                               | 2-Tb                                                               |
|----------------------------------------------------------------------|--------------------------------------------------------------------|--------------------------------------------------------------------|--------------------------------------------------------------------|
| Formula                                                              | C <sub>65</sub> H <sub>94</sub> IN <sub>4</sub> Y                  | C <sub>64</sub> H <sub>92</sub> Gd <sub>2</sub> N <sub>4</sub>     | C <sub>64</sub> H <sub>92</sub> N <sub>4</sub> Tb <sub>2</sub>     |
| <i>M</i> , g mol <sup>-1</sup>                                       | 1147.28                                                            | 1231.91                                                            | 1235.29                                                            |
| Temperature, K                                                       | 100.0(10)                                                          | 150.0(7)                                                           | 99.9(7)                                                            |
| Space group                                                          | <i>I</i> 2/ <i>a</i>                                               | <i>Pbca</i>                                                        | <i>Pna</i> 2 <sub>1</sub>                                          |
| <i>a</i> , Å                                                         | 25.2282(11)                                                        | 18.1193(11)                                                        | 30.89030(15)                                                       |
| <i>b</i> , Å                                                         | 10.9625(3)                                                         | 35.666(2)                                                          | 10.27991(6)                                                        |
| <i>c</i> , Å                                                         | 23.8393(9)                                                         | 36.498(3)                                                          | 18.11204(9)                                                        |
| <i>α</i> , deg                                                       | 90                                                                 | 90                                                                 | 90                                                                 |
| <i>β</i> , deg                                                       | 116.041(5)                                                         | 90                                                                 | 90                                                                 |
| <i>γ</i> , deg                                                       | 90                                                                 | 90                                                                 | 90                                                                 |
| <i>V</i> , Å <sup>3</sup>                                            | 5923.8(4)                                                          | 23587(3)                                                           | 5751.47(5)                                                         |
| <i>Z</i>                                                             | 4                                                                  | 16                                                                 | 4                                                                  |
| <i>d</i> <sub>cal</sub> , g cm <sup>-3</sup>                         | 1.286                                                              | 1.388                                                              | 1.429                                                              |
| Radiation                                                            | MoKα<br>(λ = 0.71073)                                              | MoKα<br>(λ = 0.71073)                                              | CuKα<br>(λ = 1.54184)                                              |
| 2θ range, deg                                                        | 6.81 to 58.298                                                     | 4.052 to 50.702                                                    | 5.722 to 155.214                                                   |
| <i>R</i> <sub>int</sub>                                              | 0.0274                                                             | 0.0795                                                             | 0.0475                                                             |
| Final indexes [ <i>F</i> <sup>2</sup> > 2σ( <i>F</i> <sup>2</sup> )] | <i>R</i> <sub>1</sub> = 0.0343,<br><i>wR</i> <sub>2</sub> = 0.0772 | <i>R</i> <sub>1</sub> = 0.0261,<br><i>wR</i> <sub>2</sub> = 0.0554 | <i>R</i> <sub>1</sub> = 0.0329,<br><i>wR</i> <sub>2</sub> = 0.0895 |
| <i>R</i> indexes (all data)                                          | <i>R</i> <sub>1</sub> = 0.0477,<br><i>wR</i> <sub>2</sub> = 0.0852 | <i>R</i> <sub>1</sub> = 0.0361,<br><i>wR</i> <sub>2</sub> = 0.0604 | <i>R</i> <sub>1</sub> = 0.0347,<br><i>wR</i> <sub>2</sub> = 0.0903 |
| <i>S</i> <sup>a</sup>                                                | 0.923                                                              | 1.039                                                              | 1.034                                                              |
| Residual map, e Å <sup>-3</sup>                                      | 0.57/-0.71                                                         | 1.93/-0.46                                                         | 1.22/-0.97                                                         |

<sup>a</sup> Conventional  $R = \frac{\sum ||F_o| - |F_c||}{\sum |F_o|}$ ;  $R_w = \left[ \frac{\sum w(F_o^2 - F_c^2)^2}{\sum w(F_o^2)^2} \right]^{1/2}$ ;  $S = \left[ \frac{\sum w(F_o^2 - F_c^2)^2}{\text{no. data} - \text{no. params}} \right]^{1/2}$  for all data.

**Table S3** Selected crystallographic data for **2-Dy**, **2-Y** and **3-Tb**.

| Compounds                                                                     | 2-Dy                                                               | 2-Y                                                                | 3-Tb                                                               |
|-------------------------------------------------------------------------------|--------------------------------------------------------------------|--------------------------------------------------------------------|--------------------------------------------------------------------|
| Formula                                                                       | C <sub>67</sub> H <sub>99</sub> N <sub>4</sub> Dy <sub>2</sub>     | C <sub>67</sub> H <sub>99</sub> N <sub>4</sub> Y <sub>2</sub>      | C <sub>74</sub> H <sub>118</sub> N <sub>4</sub> Tb <sub>2</sub>    |
| <i>M</i> , g mol <sup>-1</sup>                                                | 1285.53                                                            | 1138.34                                                            | 1381.60                                                            |
| Temperature, K                                                                | 100.0(7)                                                           | 100.0(4)                                                           | 104(6)                                                             |
| Space group                                                                   | <i>P2<sub>1</sub>/c</i>                                            | <i>P2<sub>1</sub>/c</i>                                            | <i>P-1</i>                                                         |
| <i>a</i> , Å                                                                  | 10.83820(10)                                                       | 10.83980(10)                                                       | 14.4004(3)                                                         |
| <i>b</i> , Å                                                                  | 38.9439(5)                                                         | 38.9679(2)                                                         | 15.4059(3)                                                         |
| <i>c</i> , Å                                                                  | 15.0078(3)                                                         | 15.00510(10)                                                       | 18.0500(4)                                                         |
| $\alpha$ , deg                                                                | 90                                                                 | 90                                                                 | 97.598(2)                                                          |
| $\beta$ , deg                                                                 | 105.063(2)                                                         | 105.0290(10)                                                       | 103.094(2)                                                         |
| $\gamma$ , deg                                                                | 90                                                                 | 90                                                                 | 112.008(2)                                                         |
| <i>V</i> , Å <sup>3</sup>                                                     | 6116.87(17)                                                        | 6121.42(8)                                                         | 3510.01(14)                                                        |
| <i>Z</i>                                                                      | 4                                                                  | 4                                                                  | 2                                                                  |
| <i>d</i> <sub>cal</sub> , g cm <sup>-3</sup>                                  | 1.396                                                              | 1.234                                                              | 1.320                                                              |
| Radiation                                                                     | CuK $\alpha$<br>( $\lambda$ = 1.54184)                             | CuK $\alpha$<br>( $\lambda$ = 1.54184)                             | CuK $\alpha$<br>( $\lambda$ = 1.54184)                             |
| 2 $\theta$ range, deg                                                         | 6.508 to 133.192                                                   | 4.536 to 160.27                                                    | 6.812 to 58.376                                                    |
| <i>R</i> <sub>int</sub>                                                       | 0.0875                                                             | 0.0466                                                             | 0.0493                                                             |
| Final indexes [ <i>F</i> <sup>2</sup> > 2 $\sigma$ ( <i>F</i> <sup>2</sup> )] | <i>R</i> <sub>1</sub> = 0.0823,<br><i>wR</i> <sub>2</sub> = 0.2226 | <i>R</i> <sub>1</sub> = 0.0394,<br><i>wR</i> <sub>2</sub> = 0.1025 | <i>R</i> <sub>1</sub> = 0.0411,<br><i>wR</i> <sub>2</sub> = 0.1069 |
| <i>R</i> indexes (all data)                                                   | <i>R</i> <sub>1</sub> = 0.0855,<br><i>wR</i> <sub>2</sub> = 0.2244 | <i>R</i> <sub>1</sub> = 0.0420,<br><i>wR</i> <sub>2</sub> = 0.1058 | <i>R</i> <sub>1</sub> = 0.0439,<br><i>wR</i> <sub>2</sub> = 0.1089 |
| <i>S</i> <sup>a</sup>                                                         | 1.134                                                              | 1.056                                                              | 1.028                                                              |
| Residual map, e Å <sup>-3</sup>                                               | 4.36/-3.08                                                         | 2.45/-0.83                                                         | 2.36/-1.67                                                         |

<sup>a</sup> Conventional  $R = \frac{\sum ||F_o| - |F_c||}{\sum |F_o|}$ ;  $R_w = \left[ \frac{\sum w(F_o^2 - F_c^2)^2}{\sum w(F_o^2)^2} \right]^{1/2}$ ;  $S = \left[ \frac{\sum w(F_o^2 - F_c^2)^2}{\text{no. data} - \text{no. params}} \right]^{1/2}$  for all data.

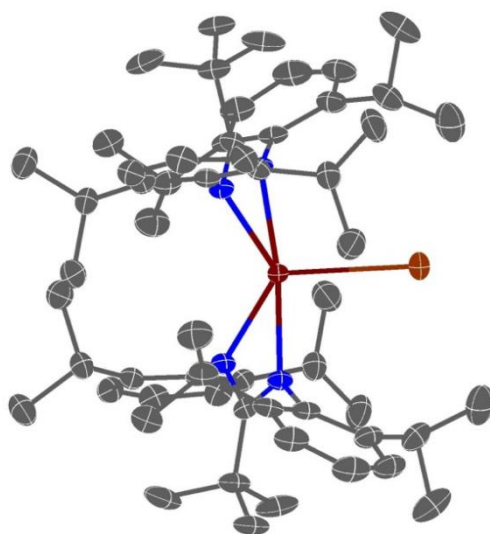

**Figure S56** Molecular structure of **1-Gd-I** with selective atom labelling (C = gray, N = blue, I = brown, Gd = wine). Thermal ellipsoids set at 50 % probability level and hydrogen atoms omitted for clarity.

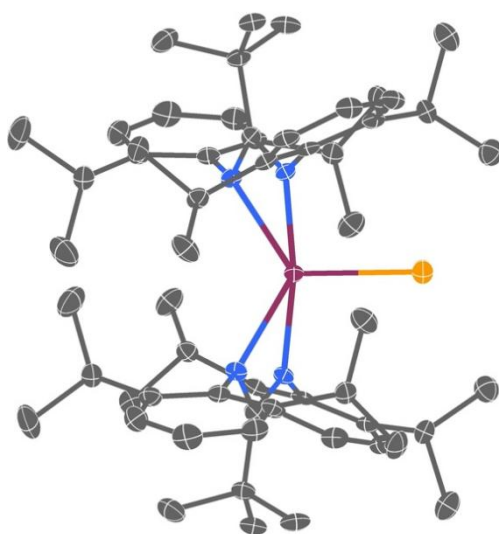

**Figure S57** Molecular structure of **1-Dy-Cl** with selective atom labelling (C = gray, N = blue, Cl = yellow, Dy = magenta). Thermal ellipsoids set at 50 % probability level and hydrogen atoms omitted for clarity.

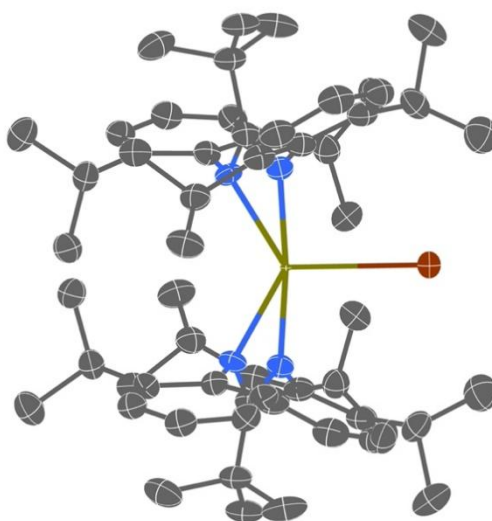

**Figure S58** Molecular structure of **1-Y-I** with selective atom labelling (C = gray, N = blue, I = brown, Y = olive). Thermal ellipsoids set at 50 % probability level and hydrogen atoms omitted for clarity.

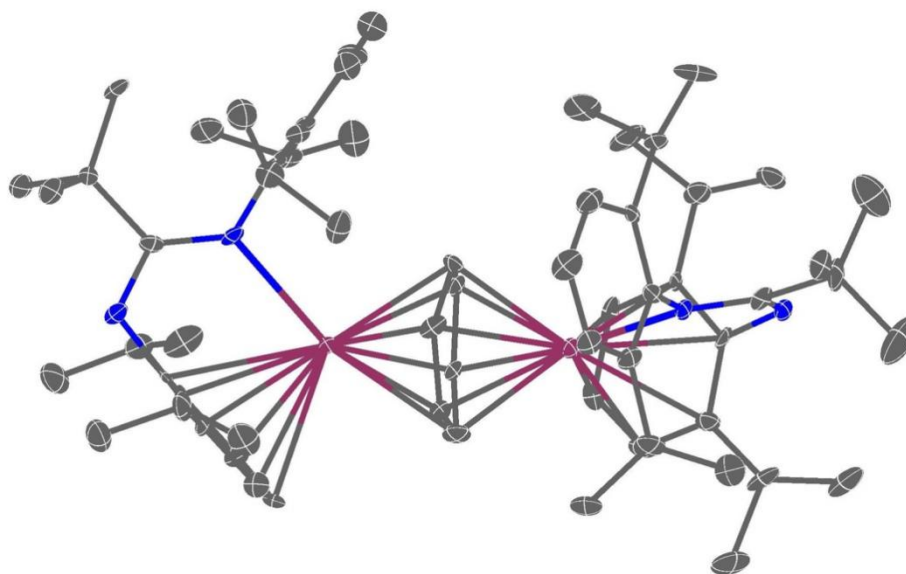

**Figure S59** Molecular structure of **2-Dy** with selective atom labelling (C = gray, N = blue, Dy = magenta). Thermal ellipsoids set at 50 % probability level and hydrogen atoms omitted for clarity.

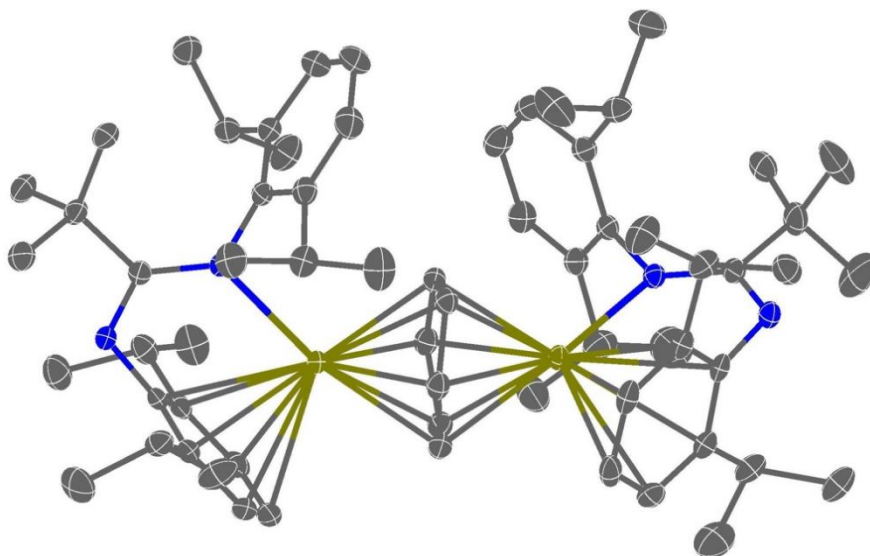

**Figure S60** Molecular structure of **2-Y** with selective atom labelling (C = gray, N = blue, Y = olive). Thermal ellipsoids set at 50 % probability level and hydrogen atoms omitted for clarity.

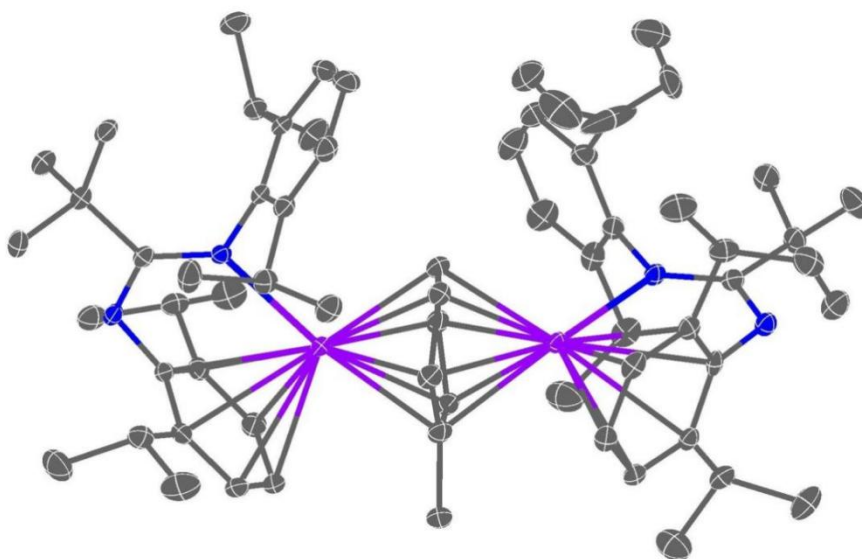

**Figure S61** Molecular structure of **3-Tb** with selective atom labelling (C = gray, N = blue, Tb = violet). Thermal ellipsoids set at 50 % probability level and hydrogen atoms omitted for clarity.



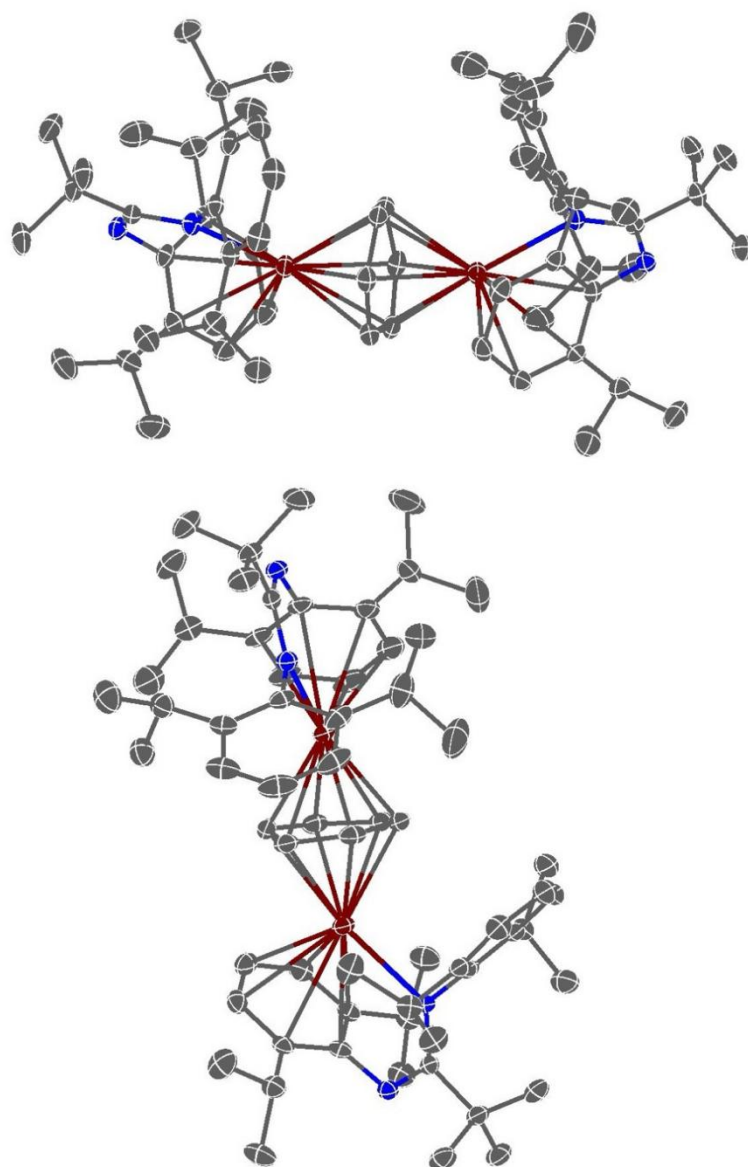

**Figure S62** Molecular structure of **2-Gd** with selective atom labelling (C = gray, N = blue, Gd = wine). Thermal ellipsoids set at 50 % probability level and hydrogen atoms omitted for clarity.

## 5. Magnetism

### 5.1 Temperature-swept magnetic measurements

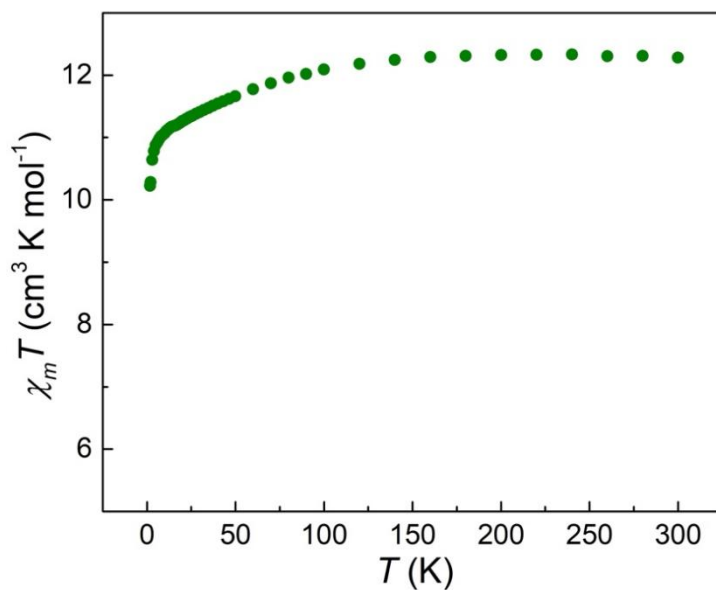

**Figure S63** Temperature dependent susceptibility of  $\chi_m T$  in an applied dc magnetic field of 1 kOe for **1-Tb-Cl**.

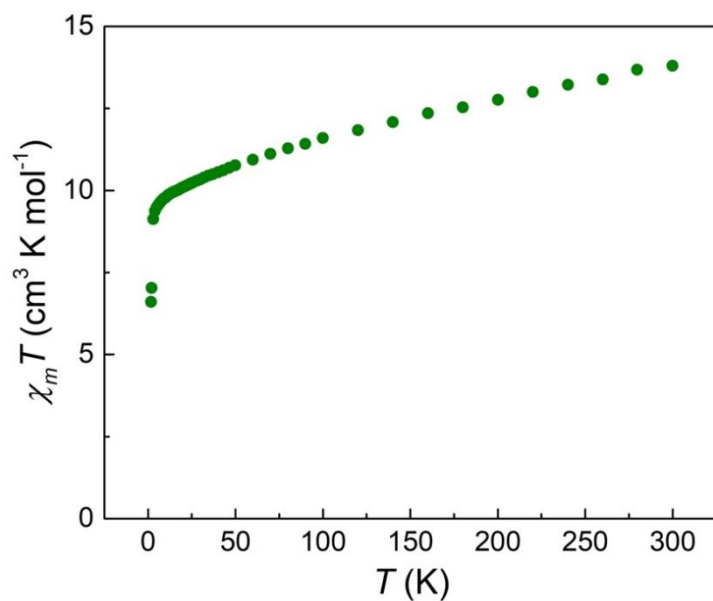

**Figure S64** Temperature dependent susceptibility of  $\chi_m T$  in an applied dc magnetic field of 1 kOe for **1-Dy-Cl**.

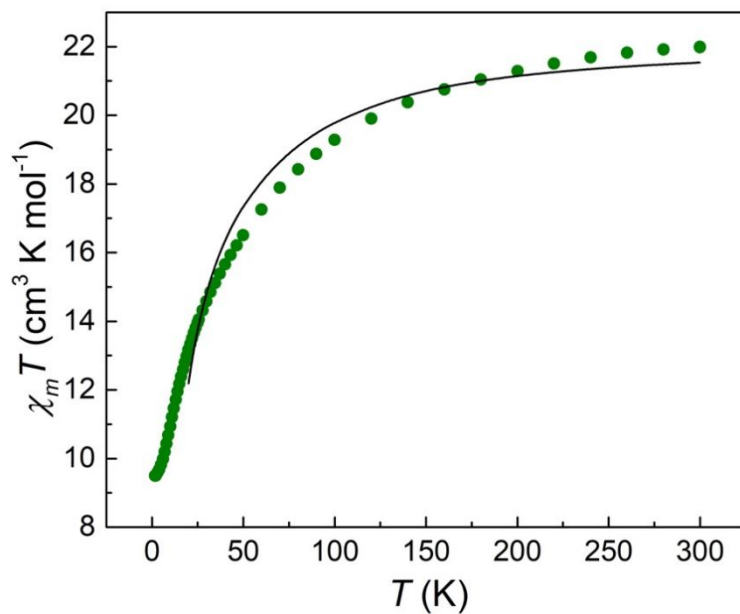

**Figure S65** Temperature dependent susceptibility of  $\chi_m T$  in an applied dc magnetic field of 1 kOe for **2-Tb**. The solid line represents the best fit through POLY\_ANISO program.

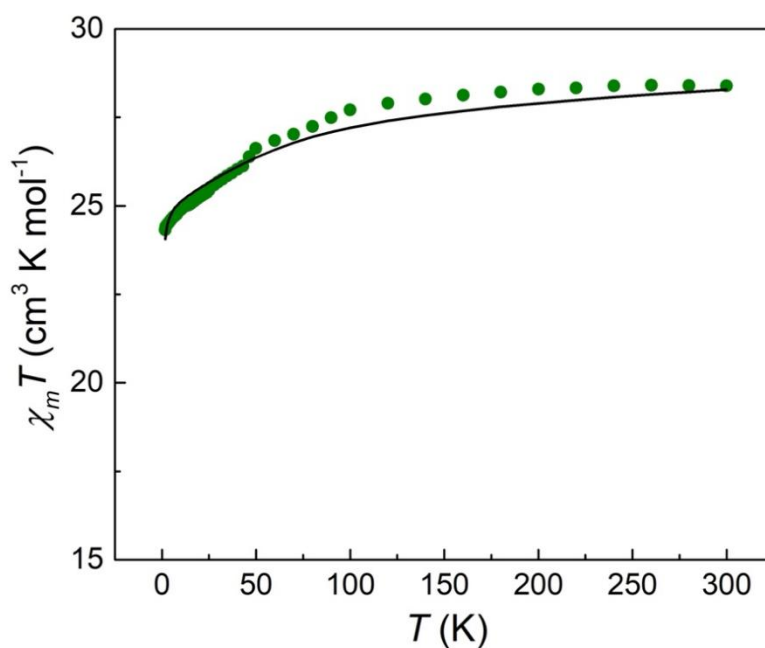

**Figure S66** Temperature dependent susceptibility of  $\chi_m T$  in an applied dc magnetic field of 1 kOe for **2-Dy**. The solid line represents the best fit through POLY\_ANISO program.

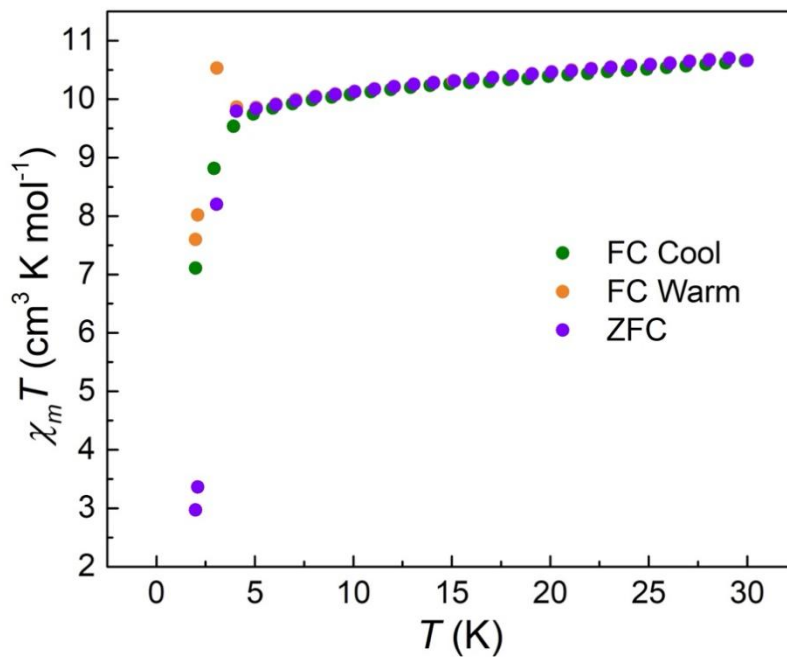

**Figure S67** The  $\chi T$  (top) and  $\chi$  (bottom) products as a function of temperature field-cooled (FC, green points) and zero-field-cooled (ZFC, blue points) variable-temperature magnetic susceptibility for **1-Dy-CI** with 1 kOe dc field in warm mode from 2 to 30 K. The orange points represent FC variable-temperature magnetic susceptibility in cool mode from 30 to 2 K.

## 5.2 Ac magnetic measurements

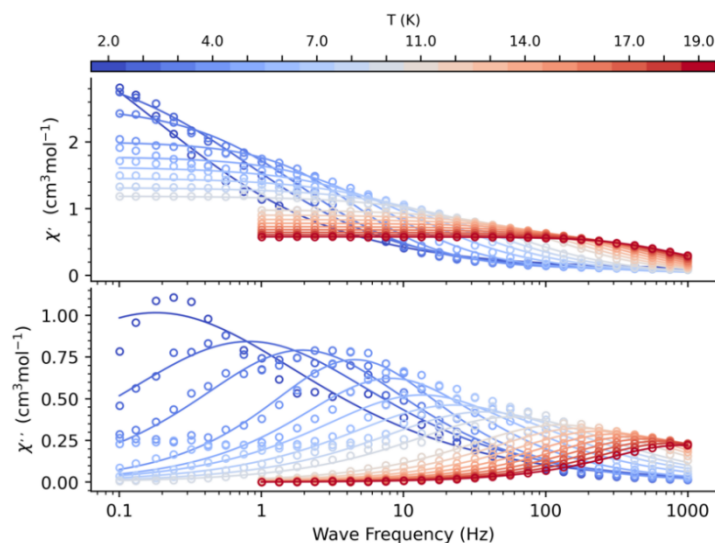

**Figure S68** In-phase ( $\chi'$ , top) and out-of-phase ( $\chi''$ , bottom) components of the ac magnetic susceptibility for **1-Tb-Cl** under 2000 applied dc field at frequencies ranging from 0.1-1000 Hz and temperatures from 28-2 K. The colored lines are guides for the eye.

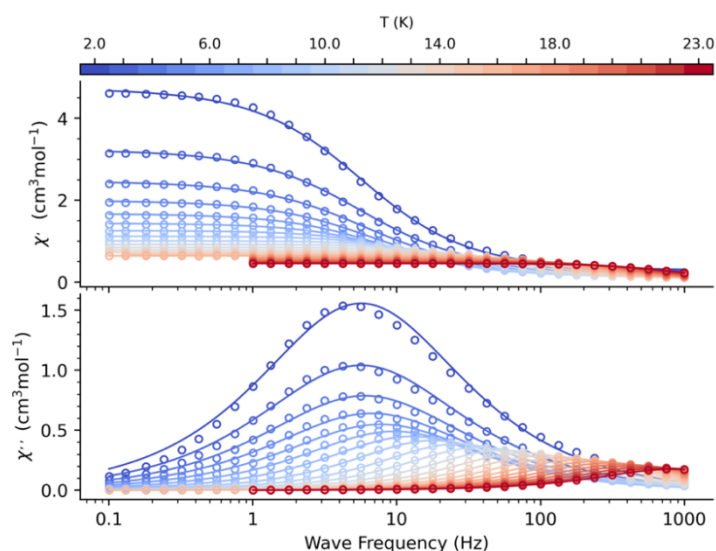

**Figure S69** In-phase ( $\chi'$ , top) and out-of-phase ( $\chi''$ , bottom) components of the ac magnetic susceptibility for **1-Dy-Cl** under zero applied dc field at frequencies ranging from 0.1-1000 Hz and temperatures from 130-65 K. The colored lines are guides for the eye.

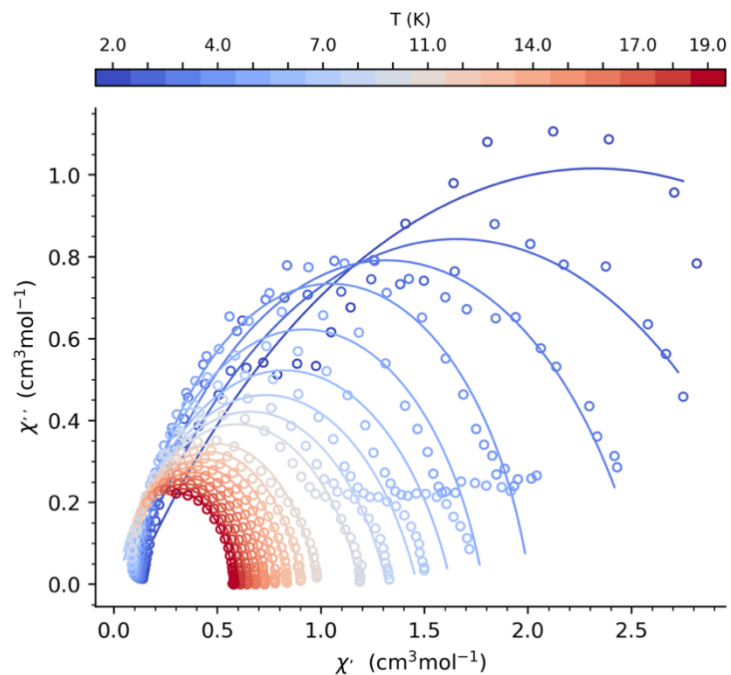

**Figure S70** Cole-Cole plots for **1-Tb-Cl** from 42-26 K under 1500 applied dc field. The colored lines are fits to generalized Debye model.

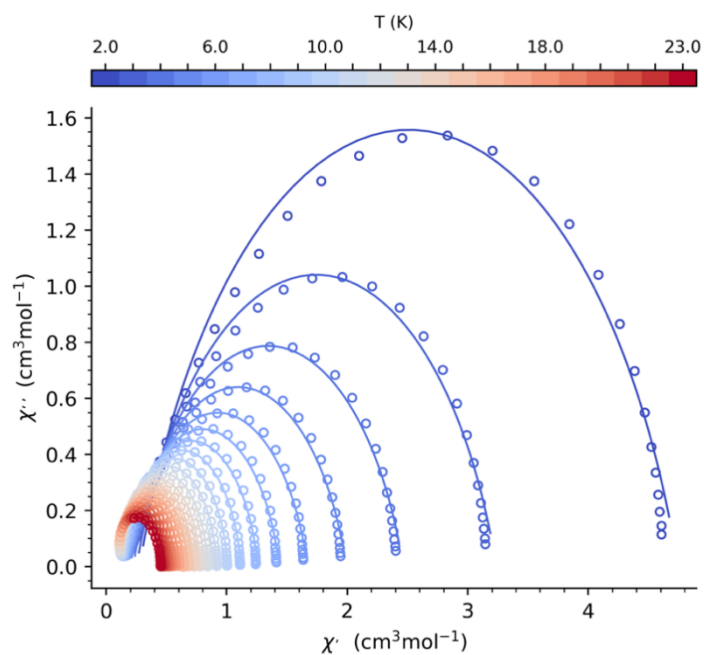

**Figure S71** Cole-Cole plots for **1-Dy-Cl** from 64-10 K under zero Oe applied dc field. The colored lines are fits to generalized Debye model.

**Table S4** Parameters used to fit ac magnetic relaxation data for **1-Tb-Cl** at 2000 Oe applied field and magnetic relaxation times extracted from these fits.

| $T$<br>(K) | $\chi_s$<br>(cm <sup>3</sup> mol <sup>-1</sup> ) | $\chi_s^{\text{err}}$ | $\chi_T$<br>(cm <sup>3</sup> mol <sup>-1</sup> ) | $\chi_T^{\text{err}}$ | $\tau_{\text{debye}}$ | $\tau_{\text{debye}}^{\text{err}}$<br>(s) | $\alpha$ | $\alpha^{\text{err}}$ |
|------------|--------------------------------------------------|-----------------------|--------------------------------------------------|-----------------------|-----------------------|-------------------------------------------|----------|-----------------------|
| 2          | 0.08858                                          | 0.02348               | 4.55617                                          | 0.23313               | 0.88171               | 0.14452                                   | 0.45651  | 0.01969               |
| 2.5        | 0.06898                                          | 0.01537               | 3.24541                                          | 0.05387               | 0.19506               | 0.00966                                   | 0.37844  | 0.01241               |
| 3          | 0.07876                                          | 0.01131               | 2.55862                                          | 0.02296               | 0.0823                | 0.00221                                   | 0.27668  | 0.01019               |
| 4          | 0.08685                                          | 0.01456               | 2.0098                                           | 0.01941               | 0.03506               | 0.0011                                    | 0.1695   | 0.01507               |
| 5          | 0.05748                                          | 0.02305               | 1.78324                                          | 0.02494               | 0.01963               | 0.00102                                   | 0.2042   | 0.02354               |
| 6          | 0.01969                                          | 0.02479               | 1.62878                                          | 0.02196               | 0.01179               | 6.78484E-4                                | 0.26654  | 0.02334               |
| 7          | 0.00372                                          | 0.02189               | 1.4649                                           | 0.01555               | 0.00701               | 3.58157E-4                                | 0.28161  | 0.01995               |
| 8          | 2.1939E-8                                        | 0.0172                | 1.31792                                          | 0.00995               | 0.00435               | 1.75588E-4                                | 0.27511  | 0.01569               |
| 9          | 0.00157                                          | 0.01337               | 1.18938                                          | 0.00638               | 0.00279               | 8.80962E-5                                | 0.25888  | 0.01237               |
| 11         | 0.00941                                          | 0.00898               | 0.985                                            | 0.00412               | 0.00127               | 2.66372E-5                                | 0.21945  | 0.00914               |
| 12         | 0.01277                                          | 0.00726               | 0.90755                                          | 0.00271               | 9.0873E-4             | 1.54781E-5                                | 0.20319  | 0.00731               |
| 13         | 0.01803                                          | 0.00587               | 0.84                                             | 0.00179               | 6.6979E-4             | 9.36112E-6                                | 0.18573  | 0.00586               |
| 14         | 0.02212                                          | 0.0057                | 0.78329                                          | 0.00146               | 5.0740E-4             | 7.03614E-6                                | 0.17336  | 0.00559               |
| 15         | 0.0268                                           | 0.00439               | 0.73067                                          | 8.9411E-4             | 3.9177E-4             | 4.32507E-6                                | 0.1595   | 0.00419               |
| 16         | 0.03418                                          | 0.00548               | 0.68578                                          | 9.1681E-4             | 3.1243E-4             | 4.45748E-6                                | 0.14475  | 0.00513               |
| 17         | 0.03955                                          | 0.00535               | 0.64666                                          | 7.2843E-4             | 2.5314E-4             | 3.6737E-6                                 | 0.13458  | 0.00485               |
| 18         | 0.04716                                          | 0.00604               | 0.6111                                           | 6.7661E-4             | 2.1021E-4             | 3.59065E-6                                | 0.12064  | 0.00536               |
| 19         | 0.05334                                          | 0.00646               | 0.57968                                          | 5.9037E-4             | 1.7650E-4             | 3.37189E-6                                | 0.11013  | 0.00555               |

**Table S5** Parameters used to fit ac magnetic relaxation data for **1-Dy-CI** at zero applied field and magnetic relaxation times extracted from these fits.

| $T$<br>(K) | $\chi_S$<br>(cm <sup>3</sup> mol <sup>-1</sup> ) | $\chi_S^{\text{err}}$ | $\chi_T$<br>(cm <sup>3</sup> mol <sup>-1</sup> ) | $\chi_T^{\text{err}}$ | $\tau_{\text{debye}}$<br>(s) | $\tau_{\text{debye}}^{\text{err}}$ | $\alpha$ | $\alpha^{\text{err}}$ |
|------------|--------------------------------------------------|-----------------------|--------------------------------------------------|-----------------------|------------------------------|------------------------------------|----------|-----------------------|
| 2          | 0.27799                                          | 0.01727               | 4.74477                                          | 0.02153               | 0.02811                      | 4.62218E-4                         | 0.22456  | 0.00719               |
| 3          | 0.25288                                          | 0.01102               | 3.2364                                           | 0.01375               | 0.02815                      | 4.4242E-4                          | 0.22443  | 0.00687               |
| 4          | 0.22347                                          | 0.00789               | 2.46454                                          | 0.0096                | 0.02648                      | 3.90097E-4                         | 0.22045  | 0.00649               |
| 5          | 0.19968                                          | 0.0065                | 1.99309                                          | 0.00757               | 0.02383                      | 3.4976E-4                          | 0.21063  | 0.00659               |
| 6          | 0.18185                                          | 0.00568               | 1.67096                                          | 0.00624               | 0.02053                      | 3.01578E-4                         | 0.19129  | 0.00683               |
| 7          | 0.16695                                          | 0.00485               | 1.43565                                          | 0.00492               | 0.0166                       | 2.27839E-4                         | 0.16259  | 0.00669               |
| 8          | 0.15244                                          | 0.00379               | 1.25717                                          | 0.00349               | 0.01246                      | 1.40898E-4                         | 0.13197  | 0.0058                |
| 9          | 0.13831                                          | 0.00272               | 1.11829                                          | 0.00223               | 0.0088                       | 7.35967E-5                         | 0.10582  | 0.00447               |
| 10         | 0.12542                                          | 0.00186               | 1.00757                                          | 0.00135               | 0.00603                      | 3.49289E-5                         | 0.08724  | 0.00319               |
| 11         | 0.11466                                          | 0.00124               | 0.91956                                          | 7.91028E-4            | 0.00416                      | 1.61547E-5                         | 0.07591  | 0.00218               |
| 12         | 0.10492                                          | 8.66883E-4            | 0.84482                                          | 4.85608E-4            | 0.00289                      | 7.86497E-6                         | 0.06896  | 0.00154               |
| 13         | 0.09744                                          | 5.39187E-4            | 0.78168                                          | 2.64103E-4            | 0.00206                      | 3.47777E-6                         | 0.0646   | 9.62458E-4            |
| 14         | 0.09104                                          | 4.51625E-4            | 0.72768                                          | 1.9262E-4             | 0.0015                       | 2.11657E-6                         | 0.06234  | 8.01658E-4            |
| 15         | 0.08513                                          | 5.91598E-4            | 0.68038                                          | 2.24181E-4            | 0.00112                      | 2.05509E-6                         | 0.06106  | 0.00104               |
| 16         | 0.08105                                          | 4.56865E-4            | 0.63915                                          | 1.45291E-4            | 8.54715E-4                   | 1.21053E-6                         | 0.06021  | 7.85192E-4            |
| 17         | 0.07687                                          | 3.99749E-4            | 0.60327                                          | 1.37394E-4            | 6.65136E-4                   | 8.20565E-7                         | 0.06099  | 6.91405E-4            |
| 18         | 0.07395                                          | 4.94375E-4            | 0.57121                                          | 1.43011E-4            | 5.27053E-4                   | 8.12787E-7                         | 0.06118  | 8.26086E-4            |
| 19         | 0.0717                                           | 5.73557E-4            | 0.54275                                          | 1.38787E-4            | 4.24088E-4                   | 7.73354E-7                         | 0.06116  | 9.20872E-4            |
| 20         | 0.07014                                          | 0.00101               | 0.51663                                          | 2.01845E-4            | 3.4476E-4                    | 1.13444E-6                         | 0.06051  | 0.00155               |
| 21         | 0.06713                                          | 8.26405E-4            | 0.49333                                          | 1.34791E-4            | 2.81413E-4                   | 7.86725E-7                         | 0.0623   | 0.00119               |
| 22         | 0.06568                                          | 0.00116               | 0.47198                                          | 1.52428E-4            | 2.31986E-4                   | 9.46628E-7                         | 0.06288  | 0.00157               |
| 23         | 0.06353                                          | 0.00151               | 0.4527                                           | 1.57399E-4            | 1.91081E-4                   | 1.06297E-6                         | 0.06431  | 0.0019                |



### 5.3 Magnetic relaxation profiles

The representative time and width of the relaxation time distributions are defined using the expectation value ( $\langle \ln \tau \rangle$ ) and variance ( $\sigma_{\ln \tau}^2$ ) of the distribution of logarithmic relaxation times.<sup>1,2</sup> These values are calculated for relaxation time distributions characterized by different empirical formulae using equations given by Zorn.<sup>3</sup>

For a generalized Debye model:

$$\langle \ln \tau \rangle = \ln \tau_{\text{debye}}$$
$$\sigma_{\ln \tau}^2 = \frac{\pi^2}{3} \left( \frac{1}{(1 - \alpha)^2} - 1 \right)$$

Equation S2

The representative (central) value of  $\tau$  is given by  $e^{\langle \ln \tau \rangle}$  and the one estimated standard deviation (ESD) upper and lower values are given by:<sup>1,2</sup>

$$\tau_{\pm} = e^{\langle \ln \tau \rangle \pm \sqrt{\sigma_{\ln \tau}^2}}$$

Equation S4

Values of  $e^{\langle \ln \tau \rangle}$ ,  $\tau_{\pm}$ ,  $\sigma_{\ln \tau}^2$  and the uncertainty  $e^{\langle \ln \tau \rangle \text{err}}$  are compared across temperatures and measurement methods in Table S5 and Table S6, respectively. We use the one ESD values represent the distributions in relaxation times and are distinct from the uncertainty in the central relaxation time.

**Table S6** Relaxation times and distributions for **1-Tb-Cl** at 2000 Oe applied field.

| $T$ (K)                | $\tau_-$ (s) | $e^{(\ln\tau)}$ (s) | $\tau_+$ (s) | $e^{(\ln\tau) \text{ err}}$ (s) | $\sigma_{\ln\tau}^2$ |
|------------------------|--------------|---------------------|--------------|---------------------------------|----------------------|
| <b>Ac Measurements</b> |              |                     |              |                                 |                      |
| 2                      | 5.3618E-02   | 0.88171             | 14.49908     | 0.14452                         | 7.83987              |
| 2.5                    | 1.9856E-02   | 0.19506             | 1.91624      | 0.00966                         | 5.22038              |
| 3                      | 1.4581E-02   | 0.0823              | 0.46453      | 0.00221                         | 2.99517              |
| 4                      | 1.0393E-02   | 0.03506             | 0.11827      | 0.0011                          | 1.47842              |
| 5                      | 4.9410E-03   | 0.01963             | 0.07799      | 0.00102                         | 1.90302              |
| 6                      | 2.1972E-03   | 0.01179             | 0.06327      | 0.00067848                      | 2.82268              |
| 7                      | 1.2115E-03   | 0.00701             | 0.04056      | 0.00035816                      | 3.08168              |
| 8                      | 7.7677E-04   | 0.00435             | 0.02436      | 0.00017559                      | 2.96798              |
| 9                      | 5.3998E-04   | 0.00279             | 0.01442      | 8.8096E-05                      | 2.69704              |
| 11                     | 2.9736E-04   | 0.00127             | 0.00542      | 2.6637E-05                      | 2.10779              |
| 12                     | 2.2983E-04   | 0.00090873          | 0.00359      | 1.5478E-05                      | 1.88987              |
| 13                     | 1.8393E-04   | 0.00066979          | 0.00244      | 9.3611E-06                      | 1.67026              |
| 14                     | 0.00015      | 0.0005074           | 0.00174      | 7.0361E-06                      | 1.52303              |
| 15                     | 0.00012      | 0.00039177          | 0.00126      | 4.3251E-06                      | 1.36571              |
| 16                     | 0.00010      | 0.00031244          | 0.00094      | 4.4575E-06                      | 1.20663              |
| 17                     | 8.86201E-05  | 0.00025314          | 0.0007231    | 3.6737E-06                      | 1.10164417           |
| 18                     | 7.87632E-05  | 0.00021021          | 0.000561     | 3.5907E-06                      | 0.96362029           |
| 19                     | 6.96781E-05  | 0.0001765           | 0.00044707   | 3.3719E-06                      | 0.86381846           |

**Table S7** Relaxation times and distributions for **1-Dy-CI** at zero applied field.

| $T$ (K)                | $\tau_-$ (s) | $e^{(\ln\tau)}$ (s) | $\tau_+$ (s) | $e^{(\ln\tau) \text{ err}}$ (s) | $\sigma_{\ln\tau}^2$ |
|------------------------|--------------|---------------------|--------------|---------------------------------|----------------------|
| <b>Ac Measurements</b> |              |                     |              |                                 |                      |
| 2                      | 6.4234E-03   | 0.02811             | 0.12302      | 4.62218E-4                      | 2.17911              |
| 3                      | 6.4365E-03   | 0.02815             | 0.12311      | 4.4242E-4                       | 2.17728              |
| 4                      | 6.1707E-03   | 0.02648             | 0.11363      | 3.90097E-4                      | 2.12163              |
| 5                      | 5.8183E-03   | 0.02383             | 0.09760      | 3.4976E-4                       | 1.98791              |
| 6                      | 5.4921E-03   | 0.02053             | 0.07674      | 3.01578E-4                      | 1.73866              |
| 7                      | 5.0842E-03   | 1.66E-02            | 0.05420      | 2.27839E-4                      | 1.40011              |
| 8                      | 4.4174E-03   | 1.25E-02            | 0.03515      | 1.40898E-4                      | 1.07530              |
| 9                      | 3.5504E-03   | 8.80E-03            | 0.02181      | 7.35967E-5                      | 0.82391              |
| 10                     | 2.6789E-03   | 6.03E-03            | 0.01357      | 3.49289E-5                      | 0.65827              |
| 11                     | 1.9655E-03   | 4.16E-03            | 0.00880      | 1.61547E-5                      | 0.56213              |
| 12                     | 1.4201E-03   | 2.89E-03            | 0.00588      | 7.86497E-6                      | 0.50488              |
| 13                     | 1.0381E-03   | 2.06E-03            | 0.00409      | 3.47777E-6                      | 0.46962              |
| 14                     | 0.00077      | 1.50E-03            | 0.00294      | 2.11657E-6                      | 0.45154              |
| 15                     | 0.00058      | 1.12E-03            | 0.00218      | 2.05509E-6                      | 0.44135              |
| 16                     | 0.00044      | 8.55E-04            | 0.00165      | 1.21053E-6                      | 0.43461              |
| 17                     | 0.00034243   | 6.65E-04            | 0.00129196   | 8.20565E-7                      | 0.44079462           |
| 18                     | 0.000271033  | 5.27E-04            | 0.00102491   | 8.12787E-7                      | 0.44230346           |
| 19                     | 0.00021811   | 4.24E-04            | 0.00082459   | 7.73354E-7                      | 0.44214459           |
| 20                     | 0.000178003  | 3.45E-04            | 0.00066774   | 1.13444E-6                      | 0.4369869            |
| 21                     | 0.000143753  | 2.81E-04            | 0.0005509    | 7.86725E-7                      | 0.45121632           |
| 22                     | 0.000118098  | 2.32E-04            | 0.0004557    | 9.46628E-7                      | 0.45584447           |
| 23                     | 9.64582E-05  | 1.91E-04            | 0.00037853   | 1.06297E-6                      | 0.46729204           |

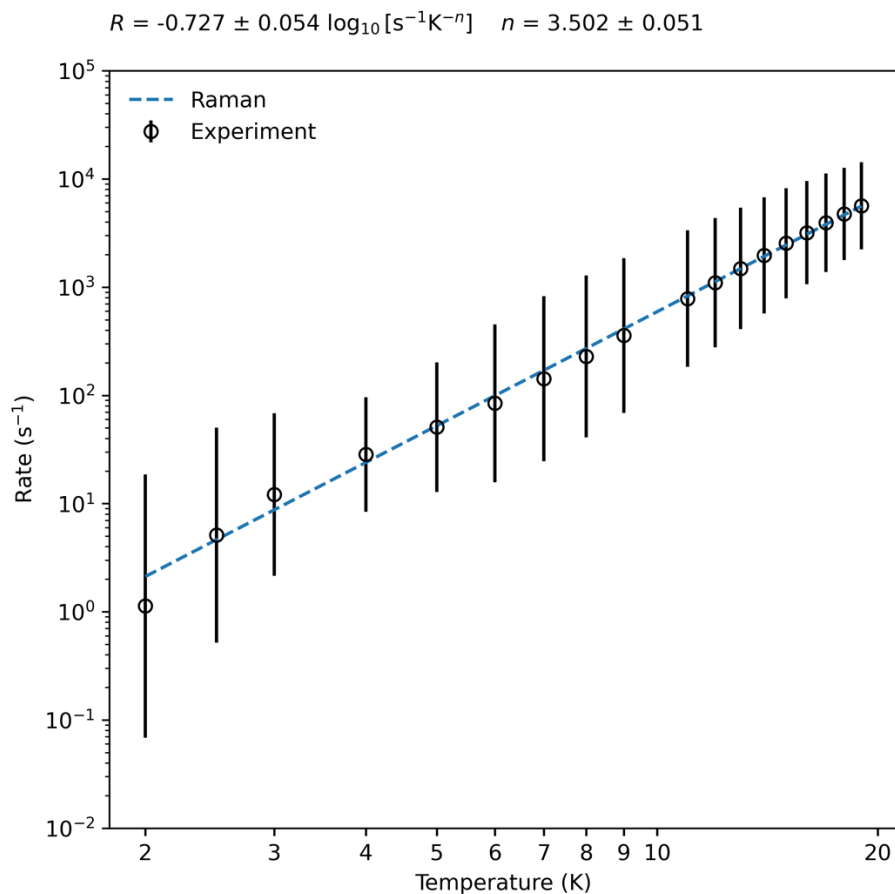

**Figure S72** Plot of natural log of the inverse relaxation time vs. temperature for crystalline **1-Tb-Cl** under 1500 Oe dc magnetic field. The dashed blue line shows  $\tau^{-1} = CT^n$ , where  $C = 10^{-0.727 \pm 0.054} (1.87 \times 10^{-1}) \text{ s}^{-1} \text{ K}^{-n}$  and  $n = 3.502 \pm 0.051$ .

$$R = -2.253 \pm 0.042 \log_{10} [s^{-1}K^{-n}] \quad n = 4.394 \pm 0.034$$

$$Q = -1.531 \pm 0.014 \log_{10} [s]$$

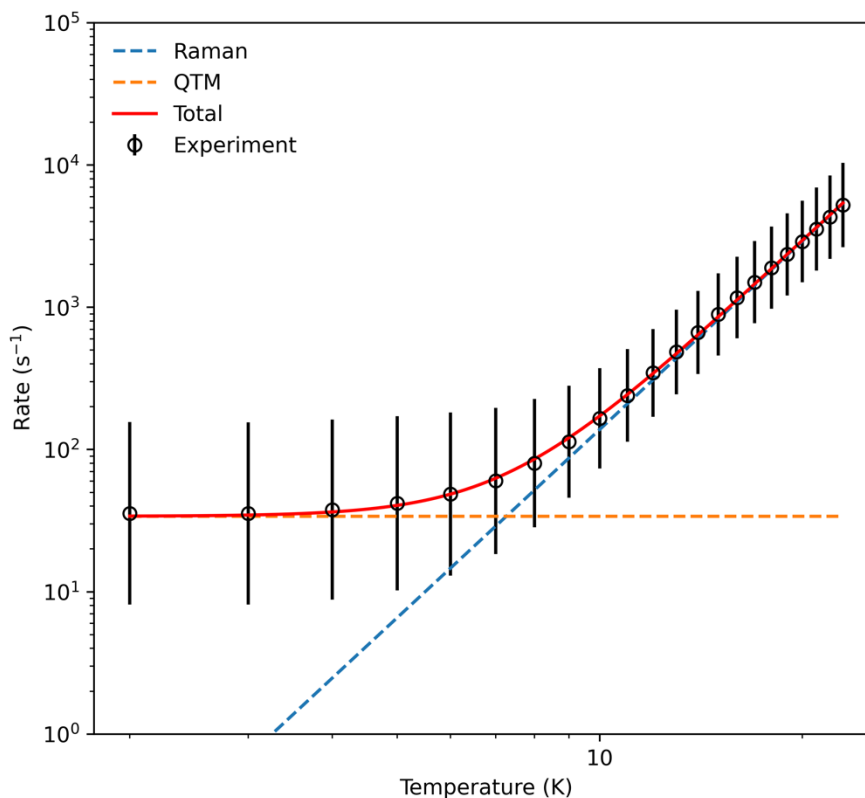

**Figure S73** Plot of natural log of the inverse relaxation time vs. temperature for crystalline **1-Dy-CI** under zero Oe dc magnetic field. The dashed blue line shows  $\tau^{-1} = CT^n$ , where  $C = 10^{-2.253 \pm 0.042} (5.58 \times 10^{-3}) s^{-1} K^{-n}$  and  $n = 4.394 \pm 0.034$ . The dashed orange line shows  $\tau^{-1} = \tau^{-1}_{QTM}$ , where  $\tau_{QTM} = 10^{-1.531 \pm 0.014} (2.94 \times 10^{-2}) s$ . Red solid line shows their sum with  $\tau^{-1} = CT^n + \tau^{-1}_{QTM}$ .

#### 5.4 Field-swept magnetic measurements

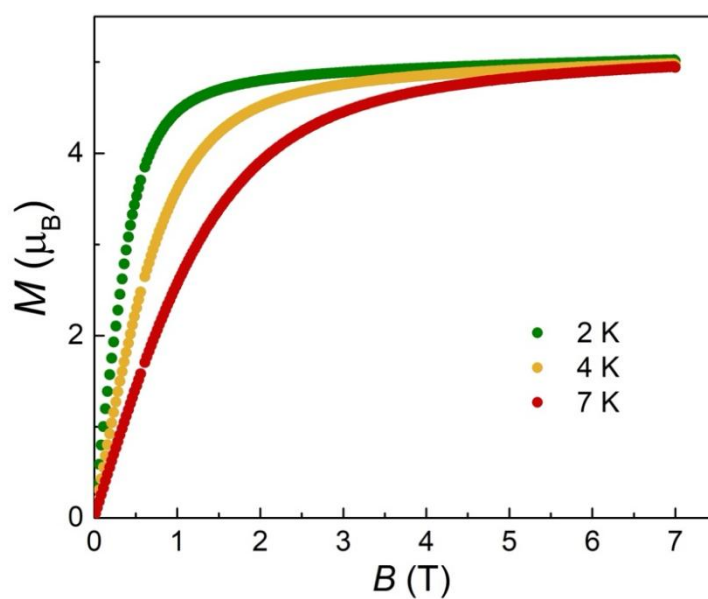

**Figure S74** Field dependent magnetization at 2.0 K up to 7 Tesla for **1-Tb-Cl**.

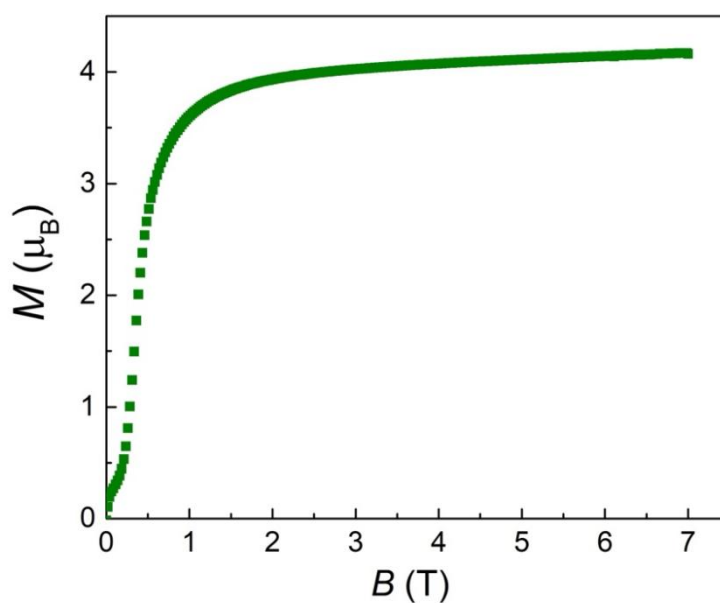

**Figure S75** Field dependent magnetization at 2.0 K up to 7 Tesla for **1-Dy-Cl**.

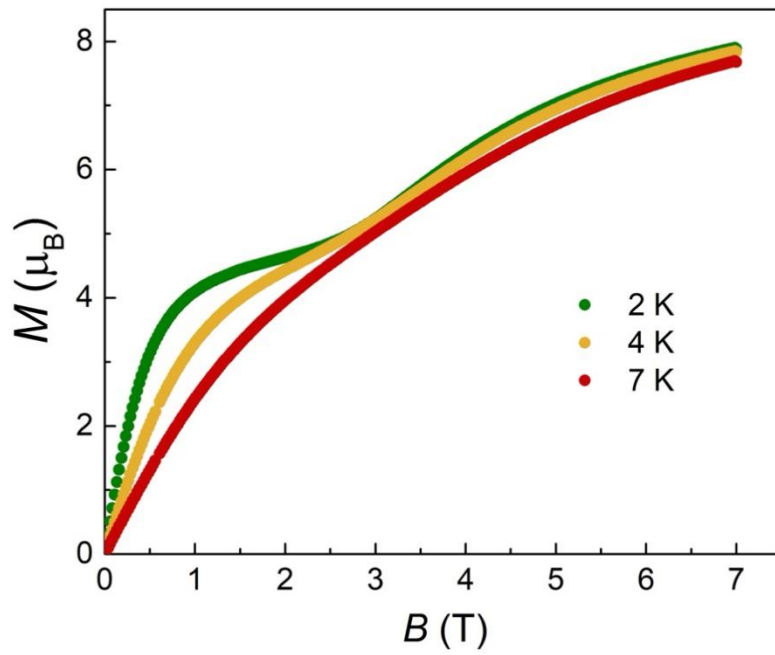

**Figure S76** Field dependent magnetization at 2.0 K up to 7 Tesla for **2-Tb**.

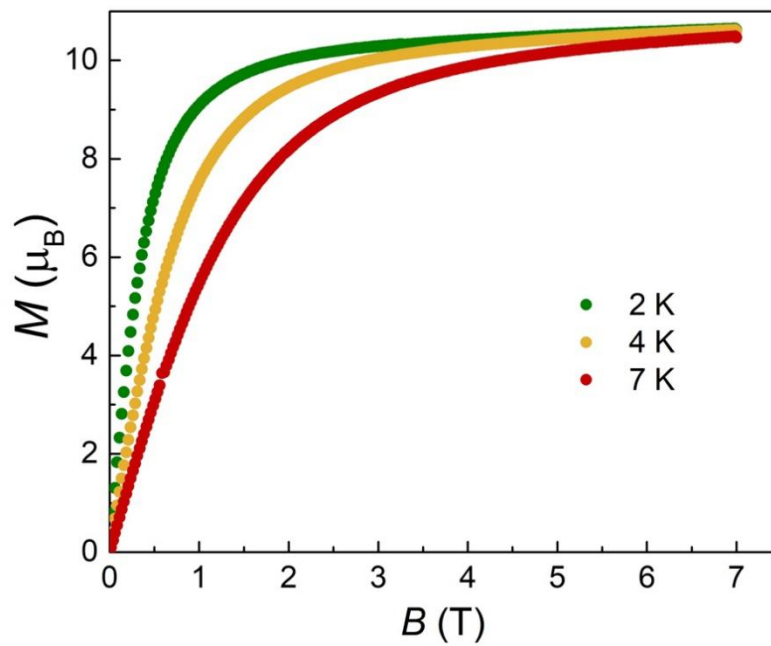

**Figure S77** Field dependent magnetization at 2.0 K up to 7 Tesla for **2-Dy**.

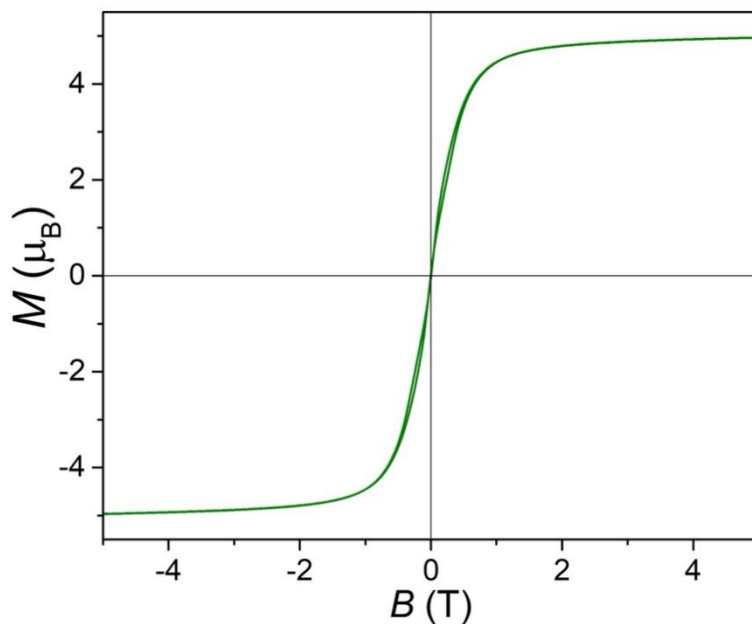

**Figure S78** Magnetic hysteresis loop measurements for **1-Tb-Cl** at an average sweep rate of 22 Oe/s at 2 K.

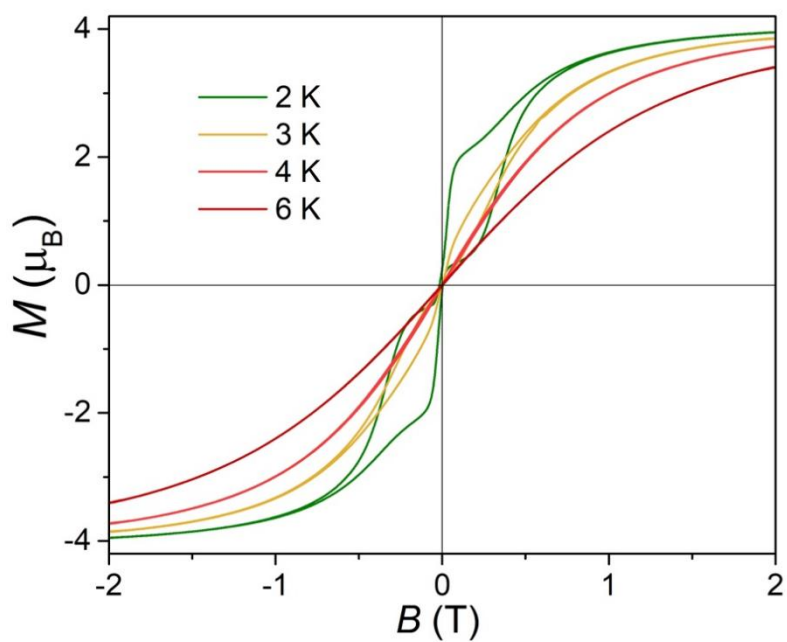

**Figure S79** Magnetic hysteresis loop measurements for **1-Dy-Cl** at an average sweep rate of 22 Oe/s in a temperature range of 2 K to 10 K.



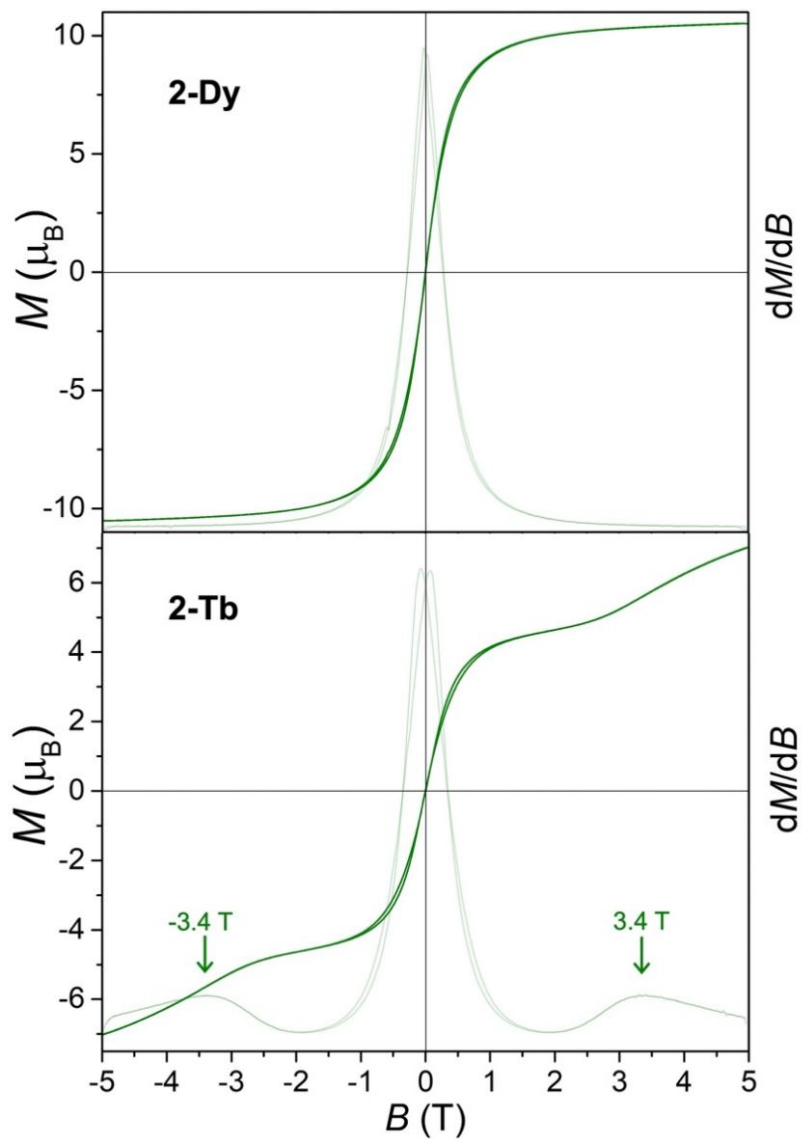

**Figure S80** Magnetization  $M$  ( $\mu_B$ ) vs. applied dc field  $B$  (T) plots and their first derivatives for **2-Dy** (above) and **2-Tb** (bottom) at 2 K under an average sweep rate of 22 Oe/s.

## 6. EPR spectroscopy

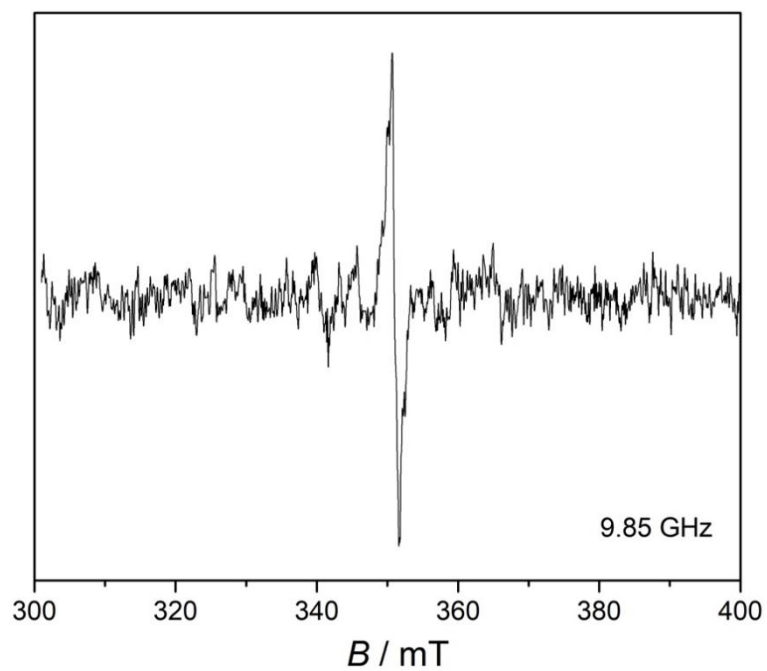

**Figure S81** X-band (9.85 GHz) cw EPR spectrum of solution sample  $[\text{Y}(\text{Piso})_2]$  intermediate at 300 K.

## 7. Calculations

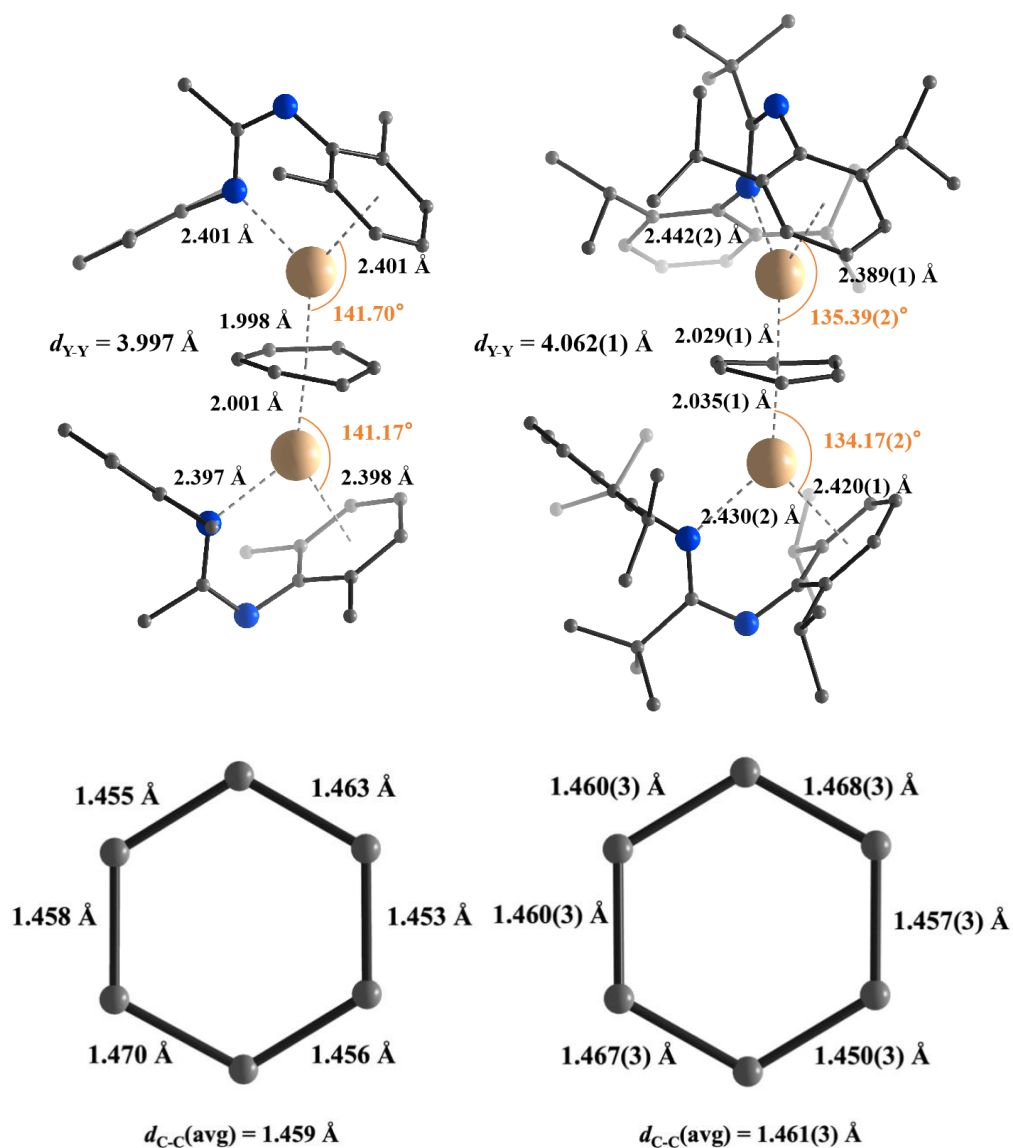

**Figure S82** The comparison of key structural parameters between the single-crystal structure of **2-Y** (right) and its optimized model complex **2-Y<sup>opt</sup>** (left). Color codes: Y, tan; N, blue; C, gray. For clarity, all hydrogen atoms and surrounding solvent molecules are omitted.

**Table S8** Optimized geometric coordinates for the model complex **2-Y<sup>opt</sup>** by DFT calculations.

|   |                  |                   |                   |
|---|------------------|-------------------|-------------------|
| Y | 4.12560669796898 | 12.48335813703601 | 6.37021192157980  |
| Y | 4.08250805886668 | 14.05392611067283 | 2.69491853632911  |
| N | 4.22621375305471 | 13.70333926602815 | 8.43532026596866  |
| C | 2.67632652064667 | 13.28192365111423 | 4.64633681551100  |
| C | 4.96053960691836 | 14.36912354829744 | 4.91858398454392  |
| C | 5.21637157385810 | 9.97905774399392  | 6.99551971994115  |
| C | 3.31453454593670 | 12.15166560750040 | 3.95704294382530  |
| C | 3.51023690439250 | 14.41631487561713 | 5.02647444497982  |
| C | 5.59411668122828 | 13.10730479858010 | 4.53483823565939  |
| C | 4.00984931958249 | 9.74329738508227  | 6.33174990294896  |
| C | 5.24659901880872 | 10.65511794504817 | 8.21139571202458  |
| C | 4.76430857366861 | 12.03530145598985 | 4.01156084849837  |
| C | 4.03022878809763 | 11.11843999265151 | 8.77502029841779  |
| C | 2.80766915443292 | 10.12455691938527 | 6.93129481965945  |
| C | 2.80180190834410 | 10.80190354473499 | 8.15237518963611  |
| N | 2.57738296691179 | 15.74181223070776 | 1.90076625939387  |
| C | 4.29912835792003 | 14.94245741289287 | 0.09422675635433  |
| C | 5.54241819010070 | 15.28419113943253 | 0.67668922859341  |
| C | 6.37109444490490 | 14.27190317618071 | 1.16188234553984  |
| C | 3.95463451412784 | 13.57899929908171 | -0.08335969252801 |
| C | 4.80296612768661 | 12.59421924751836 | 0.41518111057457  |
| C | 5.99069466894249 | 12.93137039861137 | 1.06979285450256  |
| C | 4.15359692156980 | 13.18509318885365 | 9.67795014298872  |
| C | 4.33430447348512 | 15.10185522183103 | 8.28026517508490  |
| H | 1.60779005142708 | 13.42736524963983 | 4.56171426670149  |
| H | 5.54664993275218 | 15.14106668649757 | 5.39881673221568  |
| H | 6.14780011407071 | 9.65088020846603  | 6.54680494760304  |
| H | 2.72386941709854 | 11.27556065018586 | 3.72355309851817  |
| H | 3.03877324726119 | 15.31187800774065 | 5.40079297666736  |
| H | 6.66572507441238 | 13.07117122016510 | 4.39066697480315  |
| H | 4.00546639349362 | 9.23760835635582  | 5.37502753039968  |
| C | 6.53171676056664 | 10.93565760057262 | 8.91615150296413  |
| H | 5.23687702078516 | 11.14354890484484 | 3.62478213227170  |
| N | 4.04981163848688 | 11.90364441619147 | 9.90348967278515  |
| H | 1.86664339283832 | 9.90695967255018  | 6.43859798550574  |
| C | 1.52625573177686 | 11.25060401514189 | 8.78450704964546  |
| C | 2.58081434576479 | 16.29436812718717 | 0.67000880507596  |
| C | 1.63890856424970 | 16.20254581066329 | 2.84911684505105  |
| N | 3.41402973615899 | 15.93070696875309 | -0.26618336269480 |
| C | 5.91796985518449 | 16.72331323359009 | 0.80482696810275  |
| H | 7.31294529332128 | 14.53429230373107 | 1.63094859162181  |
| C | 2.66996829240360 | 13.23433271238128 | -0.76036642127564 |
| H | 4.52606382202018 | 11.55097234085850 | 0.30961133507188  |
| H | 6.62932411510416 | 12.15614240525654 | 1.47210168869950  |
| C | 4.18467358934441 | 14.08459755960448 | 10.87597917880644 |
| C | 3.17924581726627 | 15.88073891955658 | 8.11336452810501  |
| C | 5.60044326942538 | 15.69789101070098 | 8.18412008111241  |
| H | 6.71318392735919 | 12.01017613494763 | 8.99148052089025  |
| H | 1.47906550219376 | 12.34102372797893 | 8.84168866617983  |
| C | 1.60991839442249 | 17.38293183076560 | 0.32589578694846  |

|   |                   |                   |                   |
|---|-------------------|-------------------|-------------------|
| C | 0.39281109355762  | 15.56945080296406 | 2.96088220963910  |
| C | 1.98706948653024  | 17.22819228277517 | 3.74033115948946  |
| H | 5.22628434209348  | 17.25246983481716 | 1.46490337372100  |
| H | 1.81567838506135  | 13.61427439461666 | -0.19507317044686 |
| C | 3.30992503164205  | 17.24137028827553 | 7.86370123754936  |
| C | 1.82286946946831  | 15.25375562961468 | 8.17535236374350  |
| C | 5.69365233558177  | 17.06084920365919 | 7.93005472272052  |
| C | 6.83773651347078  | 14.86887440398645 | 8.32634293941483  |
| C | 0.02888905597089  | 14.45345638836511 | 2.03338135344411  |
| C | -0.49222185817083 | 15.98045713149598 | 3.95039153091294  |
| C | 3.33234205640734  | 17.87700885047725 | 3.66490341386977  |
| C | 1.07555145532284  | 17.61659195238735 | 4.71445753558243  |
| H | 2.41375071513018  | 17.83923978680239 | 7.73372608482785  |
| C | 4.55700526886713  | 17.83453516772439 | 7.76945088167536  |
| H | 1.62513538768556  | 14.80540802241345 | 9.15373818630161  |
| H | 6.67555369339909  | 17.51769583118072 | 7.85358706436132  |
| H | 6.86248566580126  | 14.06942052707424 | 7.57719194057223  |
| H | 0.76733911355409  | 13.64580654013071 | 2.08338738738096  |
| C | -0.15832346659092 | 16.99932945030345 | 4.82583974547551  |
| H | -1.45628307650646 | 15.48823591925728 | 4.03385184584987  |
| H | 3.51562290420174  | 18.31915856970414 | 2.68160668241654  |
| H | 1.34743703816484  | 18.41292422907534 | 5.39974392851164  |
| H | 4.64332222294633  | 18.89725442210932 | 7.57152225894263  |
| H | -0.85885130752618 | 17.31187717065397 | 5.59241204265041  |
| H | -0.94941757318743 | 14.04288478847984 | 2.28882397539572  |
| H | -0.00363158421989 | 14.78565402401493 | 0.99123166741864  |
| H | 3.42402784010907  | 18.66158436698803 | 4.41766582373945  |
| H | 4.13058409719548  | 17.14740342289738 | 3.84432263026424  |
| H | 2.62629888383229  | 13.70705781874206 | -1.74487019236117 |
| H | 2.56545348122303  | 12.15414955368278 | -0.87158982225656 |
| H | 6.92812474268826  | 16.82804886308845 | 1.20324371784658  |
| H | 5.85655906738573  | 17.21477629900600 | -0.16927221575946 |
| H | 1.75633231306734  | 17.68009056579013 | -0.71054856013834 |
| H | 0.57929192068705  | 17.05082109749859 | 0.47400056135836  |
| H | 1.75574860095756  | 18.24746856380044 | 0.97921619884169  |
| H | 6.48808984219323  | 10.55495452841591 | 9.93984621380626  |
| H | 7.37062569143220  | 10.47426452999671 | 8.39299012461244  |
| H | 0.66479617521286  | 10.89241179705892 | 8.21912954389846  |
| H | 1.46684334444447  | 10.88262126885194 | 9.81185006414549  |
| H | 5.11752417861055  | 14.65386626328913 | 10.90895139731950 |
| H | 3.37391461714446  | 14.81635594929459 | 10.83174400677909 |
| H | 4.09095502273307  | 13.48423069316182 | 11.77863159741349 |
| H | 1.04753663032650  | 15.99412838800477 | 7.97319348281373  |
| H | 1.72597820610560  | 14.45482312568438 | 7.43224274599258  |
| H | 7.73089281129738  | 15.48354675575701 | 8.20211846562007  |
| H | 6.89103035405489  | 14.38394054546007 | 9.30545781283925  |

**Table S9** Calculated Mayer bond orders (MBOs) of the coordinated bonds and C-C bonds on the bound arene in **2-Y<sup>opt</sup>**.

|                 |                 |                 |        |        |        |        |        |
|-----------------|-----------------|-----------------|--------|--------|--------|--------|--------|
| Y1-N3           | Y2-N16          | Y1-C4           | Y1-C5  | Y1-C7  | Y1-C8  | Y1-C9  | Y1-C12 |
| 0.1450          | 0.1471          | 0.1890          | 0.1447 | 0.1335 | 0.1093 | 0.2209 | 0.1578 |
| Y2-C4           | Y2-C5           | Y2-C7           | Y2-C8  | Y2-C9  | Y2-C12 | Y1-C6  | Y1-C10 |
| 0.1176          | 0.1656          | 0.2263          | 0.1414 | 0.1436 | 0.1632 | 0.0791 | 0.1631 |
| Y1-C11          | Y1-C13          | Y1-C14          | Y1-C15 | Y2-C17 | Y2-C18 | Y2-C19 | Y2-C20 |
| 0.0746          | 0.1994          | 0.1000          | 0.0450 | 0.1988 | 0.0538 | 0.0915 | 0.0686 |
| Y2-C21          | Y2-C22          | C4-C7           | C4-C8  | C5-C8  | C5-C9  | C9-C12 | C7-C12 |
| 0.0866          | 0.1669          | 1.1211          | 1.0570 | 1.1027 | 1.0992 | 1.0419 | 1.0516 |
| <b>Avg. Y-N</b> | <b>Avg. Y-C</b> | <b>Avg. C-C</b> |        |        |        |        |        |
| <b>0.1461</b>   | <b>0.1350</b>   | <b>1.0789</b>   |        |        |        |        |        |

**Table S10** TDDFT calculated electronic excitation in **2-Y<sup>opt</sup>**. Only transitions with oscillator strengths ( $f$ ) larger than 0.035 are summarized.

| Wavelength (nm) | Oscillator strength $f$ | Dominant Contributions (>20%)                                 |
|-----------------|-------------------------|---------------------------------------------------------------|
| 583.06          | 0.42125                 | HOMO-1→LUMO (34.3%); HOMO→LUMO+3 (31.9%); HOMO→LUMO+1 (21.9%) |
| 555.90          | 0.15928                 | HOMO→LUMO+3 (53.4%)                                           |
| 426.98          | 0.07862                 | HOMO→LUMO+4 (78.8%)                                           |
| 341.17          | 0.03925                 | HOMO→LUMO+12 (59.7%)                                          |
| 303.03          | 0.04805                 | HOMO-1→LUMO+13 (51.6%)                                        |
| 285.88          | 0.06052                 | HOMO-1→LUMO+15 (64.7%)                                        |
| 281.60          | 0.05284                 | HOMO-5→LUMO (69.2%)                                           |
| 280.49          | 0.09942                 | HOMO-5→LUMO+1 (47.6%); HOMO→LUMO+17 (24.1%)                   |
| 279.95          | 0.06339                 | HOMO→LUMO+17 (41.6%); HOMO-5→LUMO+1 (21.2%)                   |
| 271.78          | 0.07514                 | HOMO-1→LUMO+17 (74.0%)                                        |
| 264.59          | 0.08912                 | HOMO-3→LUMO+2 (28.8%); HOMO→LUMO+19 (23.4%)                   |
| 261.05          | 0.07993                 | HOMO→LUMO+20 (53.1%)                                          |
| 249.10          | 0.08984                 | HOMO-5→LUMO+3 (33.0%); HOMO-8→LUMO (23.0%)                    |
| 248.86          | 0.05816                 | HOMO-5→LUMO+2 (38.6%); HOMO-8→LUMO+1 (20.6%)                  |
| 241.71          | 0.08605                 | HOMO-1→LUMO+21 (23.2%)                                        |

**Table S11** CASSCF calculated electronic states for **1-Dy-Cl**.

| <i>Ab initio</i><br>Energy<br>(cm <sup>-1</sup> ) | <i>Ab initio</i><br>Energy<br>(K) | <i>g<sub>x</sub></i> | <i>g<sub>y</sub></i> | <i>g<sub>z</sub></i> | <i>g<sub>z</sub></i><br>Angle<br>(°) | Crystal field Wavefunction                                  |
|---------------------------------------------------|-----------------------------------|----------------------|----------------------|----------------------|--------------------------------------|-------------------------------------------------------------|
| 0                                                 | 0                                 | 0.00                 | 0.00                 | 19.92                | -                                    | 98.9% ±15/2>                                                |
| 204                                               | 293                               | 0.02                 | 0.02                 | 17.33                | 12.36                                | 88.9% ±13/2>+10.0% ±11/2>                                   |
| 407                                               | 585                               | 0.71                 | 1.17                 | 13.54                | 0.77                                 | 70.5% ±11/2>+12.4% ±9/2>                                    |
| 507                                               | 729                               | 2.70                 | 6.16                 | 11.77                | 89.76                                | 26.3% ±9/2>+23.0% ±5/2>                                     |
| 570                                               | 819                               | 1.40                 | 3.40                 | 11.43                | 70.50                                | 31.9% ±9/2>+14.6% ±7/2>+15.1% ∓7/2>                         |
| 665                                               | 956                               | 0.58                 | 0.81                 | 13.13                | 89.56                                | 28.7% ±7/2>+25.0% ∓3/2>+14.2% ∓5/2>+19.5% ∓9/2>             |
| 851                                               | 1223                              | 0.30                 | 0.48                 | 15.79                | 80.09                                | 14.0% ±5/2>+11.0% ±1/2>+14.0% ∓1/2>+17.0% ∓5/2>+25.8% ∓7/2> |
| 1188                                              | 1708                              | 0.02                 | 0.03                 | 19.21                | 81.88                                | 21.2% ±1/2>+18.6% ∓1/2>+35.4% ∓3/2>+15.7% ∓5/2>             |

Only components with > 10% contribution are given, rounded to the nearest percent.

**Table S12** CASSCF calculated electronic states for fragment 1 of **2-Dy**.

| <i>Ab initio</i><br>Energy<br>(cm <sup>-1</sup> ) | <i>Ab initio</i><br>Energy<br>(K) | <i>g<sub>x</sub></i> | <i>g<sub>y</sub></i> | <i>g<sub>z</sub></i> | <i>g<sub>z</sub></i><br>Angle<br>(°) | Crystal field Wavefunction                      |
|---------------------------------------------------|-----------------------------------|----------------------|----------------------|----------------------|--------------------------------------|-------------------------------------------------|
| 0                                                 | 0                                 | 0.00                 | 0.00                 | 19.91                | -                                    | 99.1% ±15/2>                                    |
| 177                                               | 254                               | 0.04                 | 0.05                 | 17.25                | 13.10                                | 89.7% ±13/2>                                    |
| 342                                               | 492                               | 0.89                 | 3.17                 | 12.29                | 26.32                                | 48.5% ±11/2>+16.7% ±9/2>                        |
| 358                                               | 515                               | 0.91                 | 2.40                 | 15.20                | 86.02                                | 10.8% ±11/2>+37.3% ±1/2>+13.4% ∓3/2>            |
| 479                                               | 689                               | 2.27                 | 3.88                 | 8.23                 | 38.65                                | 25.2% ±9/2>+16.2% ±7/2>+13.3% ∓7/2>             |
| 545                                               | 783                               | 0.76                 | 1.39                 | 17.54                | 69.84                                | 20.8% ±7/2>+35.2% ±5/2>+21.4% ±3/2>             |
| 588                                               | 845                               | 2.38                 | 3.87                 | 12.95                | 62.04                                | 11.7% ±5/2>+15.5% ∓7/2>+35.6% ∓9/2>             |
| 697                                               | 1002                              | 0.52                 | 1.77                 | 18.49                | 84.81                                | 16.3% ±5/2>+23.5% ±1/2>+25.2% ∓3/2>+16.6% ∓7/2> |

Only components with > 10% contribution are given, rounded to the nearest percent.

**Table S13** CASSCF calculated electronic states for fragment 2 of **2-Dy**.

| <i>Ab initio</i><br>Energy<br>(cm <sup>-1</sup> ) | <i>Ab initio</i><br>Energy<br>(K) | <i>g<sub>x</sub></i> | <i>g<sub>y</sub></i> | <i>g<sub>z</sub></i> | <i>g<sub>z</sub></i><br>Angle<br>(°) | Crystal field Wavefunction                                  |
|---------------------------------------------------|-----------------------------------|----------------------|----------------------|----------------------|--------------------------------------|-------------------------------------------------------------|
| 0                                                 | 0                                 | 0.00                 | 0.00                 | 19.89                | -                                    | 98.8% ±15/2>                                                |
| 163                                               | 234                               | 0.02                 | 0.03                 | 17.28                | 11.83                                | 92.1% ±13/2>                                                |
| 344                                               | 495                               | 1.09                 | 2.75                 | 12.81                | 28.60                                | 53.8% ±11/2>+12.9% ±9/2>+12.2% ±1/2>                        |
| 368                                               | 529                               | 1.05                 | 2.52                 | 14.67                | 89.31                                | 14.5% ±11/2>+36.1% ±1/2>+23.6% ∓3/2>                        |
| 488                                               | 702                               | 3.74                 | 5.47                 | 8.13                 | 58.62                                | 21.1% ±9/2>+16.6% ±3/2>+13.8% ∓1/2>+13.3% ∓7/2>             |
| 542                                               | 779                               | 0.01                 | 0.77                 | 17.01                | 67.96                                | 19.8% ±7/2>+16.3% ±5/2>+22.1% ±3/2>                         |
| 616                                               | 886                               | 0.95                 | 3.10                 | 10.53                | 88.24                                | 31.0% ±5/2>+16.3% ∓7/2>+13.7% ∓9/2>                         |
| 683                                               | 982                               | 1.08                 | 5.68                 | 15.18                | 85.90                                | 13.1% ±5/2>+11.0% ±1/2>+17.7% ∓3/2>+26.7% ∓7/2>+13.0% ∓9/2> |

Only components with > 10% contribution are given, rounded to the nearest percent.

**Table S14** CASSCF calculated electronic states for **1-Tb-Cl**.

| Levels | <i>Ab initio</i><br>Energy<br>(cm <sup>-1</sup> ) | <i>Ab initio</i><br>Energy<br>(K) | <i>g<sub>z</sub></i> | <i>g<sub>z</sub></i><br>Angle<br>(°) | $\Delta_{\text{tun}}$<br>(cm <sup>-1</sup> ) | Crystal field Wavefunction                       |
|--------|---------------------------------------------------|-----------------------------------|----------------------|--------------------------------------|----------------------------------------------|--------------------------------------------------|
| 1      | 0.00                                              | 0.00                              |                      |                                      |                                              |                                                  |
| 2      | 0.01                                              | 0.01                              | 17.82                | -                                    | 0.01                                         | 49.1% ±6>+49.1% ∓6>                              |
| 3      | 232.38                                            | 334.07                            |                      |                                      |                                              |                                                  |
| 4      | 232.79                                            | 334.66                            | 14.18                | 2.94                                 | 0.41                                         | 46.1% +5>+46.1% -5>                              |
| 5      | 453.14                                            | 651.43                            |                      |                                      |                                              |                                                  |
| 6      | 459.64                                            | 660.78                            | 10.60                | 8.96                                 | 6.50                                         | 46.2% -5>+46.2% +5>                              |
| 7      | 633.90                                            | 911.29                            |                      |                                      |                                              |                                                  |
| 8      | 679.52                                            | 976.88                            | 7.33                 | 18.04                                | 45.62                                        | 38.9% +4>+38.9% -4>                              |
| 9      | 772.15                                            | 1110.04                           |                      |                                      |                                              |                                                  |
| 10     | 900.28                                            | 1294.24                           | 5.50                 | 26.27                                | 128.13                                       | 40.9% -4>+40.9% +4>                              |
| 11     | 927.18                                            | 1332.91                           |                      |                                      |                                              |                                                  |
| 12     | 1094.40                                           | 1573.31                           | 4.32                 | 29.23                                | 167.22                                       | 25.8% +3>+13.9% 0>+25.8% -3>                     |
| 13     | 1102.07                                           | 1584.34                           | -                    | -                                    | -                                            | 36.2% -3>+36.2% +3>                              |
|        |                                                   |                                   |                      |                                      |                                              | 14.7% +2>+16.9% +1>+19.5% 0>+16.9% -1>+14.7% -2> |
|        |                                                   |                                   |                      |                                      |                                              | 34.9% -2>+34.9% +2>                              |
|        |                                                   |                                   |                      |                                      |                                              | 19.0% +3>+15.6% +1>+28.1% 0>+15.6% -1>+19.0% -3> |
|        |                                                   |                                   |                      |                                      |                                              | 35.6% -1>+35.6% +1>                              |
|        |                                                   |                                   |                      |                                      |                                              | 22.9% +2>+38.0% 0>+22.9% -2>                     |

Only components with > 10% contribution are given, rounded to the nearest percent.



**Table S15** CASSCF calculated electronic states for **2-Tb**'s fragment 1.

| Levels | <i>Ab initio</i><br>Energy<br>(cm <sup>-1</sup> ) | <i>Ab initio</i><br>Energy<br>(K) | $g_z$ | $g_z$<br>Angle<br>(°) | $\Delta_{\text{tun}}$<br>(cm <sup>-1</sup> ) | Crystal field<br>Wavefunction                                       |
|--------|---------------------------------------------------|-----------------------------------|-------|-----------------------|----------------------------------------------|---------------------------------------------------------------------|
| 1      | 0.00                                              | 0.00                              |       |                       |                                              |                                                                     |
| 2      | 0.02                                              | 0.02                              | 17.94 | -                     | 0.02                                         | 49.7% ±6>+49.7% ∓6>                                                 |
| 3      | 149.58                                            | 215.04                            |       |                       |                                              | 28.0% +5>+28.0% -5>                                                 |
| 4      | 151.00                                            | 217.08                            | 15.90 | 42.66                 | 1.42                                         | 28.4% -5>+28.4% +5>                                                 |
| 5      | 203.74                                            | 292.89                            |       |                       |                                              | 17.0% +5>+10.1% +2>+16.0% <br>+1>+16.0% -1>+10.1% -2>+1<br>7.0% -5> |
| 6      | 211.05                                            | 303.41                            |       |                       |                                              | 18.2% -5>+12.0% -2>+13.2% <br>0>+12.0% +2>+18.2% +5>                |
| 7      | 304.05                                            | 437.10                            |       |                       |                                              | 23.4% +4>+37.1% 0>+23.4% -<br>4>                                    |
| 8      | 325.09                                            | 467.35                            | 9.05  | 41.83                 | 21.04                                        | 20.8% -4>+22.1% -1>+22.1% <br>+1>+20.8% +4>                         |
| 9      | 425.96                                            | 612.35                            |       |                       |                                              | 15.2% +4>+12.1% +3>+14.2% <br>+2>+14.2% -2>+12.1% -3>+1<br>5.2% -4> |
| 10     | 435.47                                            | 626.04                            |       |                       |                                              | 15.7% -4>+10.6% -1>+22.7% <br>0>+10.6% +1>+15.7% +4>                |
| 11     | 501.88                                            | 721.50                            |       |                       |                                              | 26.0% +3>+15.0% +2>+15.0% <br>-2>+26.0% -3>                         |
| 12     | 604.22                                            | 868.63                            | 3.01  | 36.96                 | 102.34                                       | 13.4% -3>+27.1% -1>+27.1% <br>+1>+13.4% +3>                         |
| 13     | 618.06                                            | 888.52                            | -     | -                     | -                                            | 27.1% +2>+21.9% 0>+27.1% -<br>2>                                    |

Only components with > 10% contribution are given, rounded to the nearest percent.

**Table S16** CASSCF calculated electronic states for **2-Tb**'s fragment 2.

| Levels | <i>Ab initio</i><br>Energy<br>(cm <sup>-1</sup> ) | <i>Ab initio</i><br>Energy<br>(K) | <i>g<sub>z</sub></i> | <i>g<sub>z</sub></i><br>Angle<br>(°) | $\Delta_{\text{tun}}$<br>(cm <sup>-1</sup> ) | Crystal field<br>Wavefunction                                                              |
|--------|---------------------------------------------------|-----------------------------------|----------------------|--------------------------------------|----------------------------------------------|--------------------------------------------------------------------------------------------|
| 1      | 0.00                                              | 0.00                              |                      |                                      |                                              |                                                                                            |
| 2      | 0.02                                              | 0.03                              | 17.93                | -                                    | 0.02                                         | 49.6% ±6>+49.6% ∓6>                                                                        |
| 3      | 155.02                                            | 222.85                            |                      |                                      |                                              |                                                                                            |
| 4      | 156.02                                            | 224.29                            | 15.42                | 31.68                                | 1.00                                         | 36.8% +5>+36.8% -5>                                                                        |
| 5      | 243.80                                            | 350.48                            |                      |                                      |                                              |                                                                                            |
| 6      | 248.60                                            | 357.39                            | 12.24                | 37.63                                | 4.81                                         | 37.1% -5>+37.1% +5><br>11.5% +5>+10.0% +3>+11.2% +<br>2>+11.2% -2>+10.0% -3>+11.5<br>% -5> |
| 7      | 362.69                                            | 521.41                            |                      |                                      |                                              |                                                                                            |
| 8      | 379.07                                            | 544.95                            | 9.09                 | 36.07                                | 16.38                                        | 12.2% -5>+11.2% -3>+11.7% -<br>2>+11.7% +2>+11.2% +3>+12.2<br>% +5>                        |
| 9      | 487.18                                            | 700.37                            |                      |                                      |                                              |                                                                                            |
| 10     | 509.53                                            | 732.51                            | 5.73                 | 35.79                                | 22.35                                        | 26.0% +4>+23.3% 0>+26.0% -4<br>>                                                           |
| 11     | 586.11                                            | 842.59                            |                      |                                      |                                              |                                                                                            |
| 12     | 637.00                                            | 915.75                            | 2.85                 | 37.27                                | 50.89                                        | 25.7% -4>+18.3% -1>+18.3% +<br>1>+25.7% +4>                                                |
| 13     | 661.78                                            | 951.37                            | -                    | -                                    | -                                            | 16.3% +3>+10.1% +1>+25.3% 0<br>>+10.1% -1>+16.3% -3>                                       |
|        |                                                   |                                   |                      |                                      |                                              | 20.8% -3>+21.2% 0>+20.8% +3<br>>                                                           |
|        |                                                   |                                   |                      |                                      |                                              | 15.8% +3>+20.5% +2>+10.9% +<br>1>+10.9% -1>+20.5% -2>+15.8<br>% -3>                        |
|        |                                                   |                                   |                      |                                      |                                              | 12.1% -3>+21.4% -1>+12.1% 0<br>>+21.4% +1>+12.1% +3>                                       |
|        |                                                   |                                   |                      |                                      |                                              | 28.9% +2>+11.9% +1>+11.9% -<br>1>+28.9% -2>                                                |

Only components with > 10% contribution are given, rounded to the nearest percent.

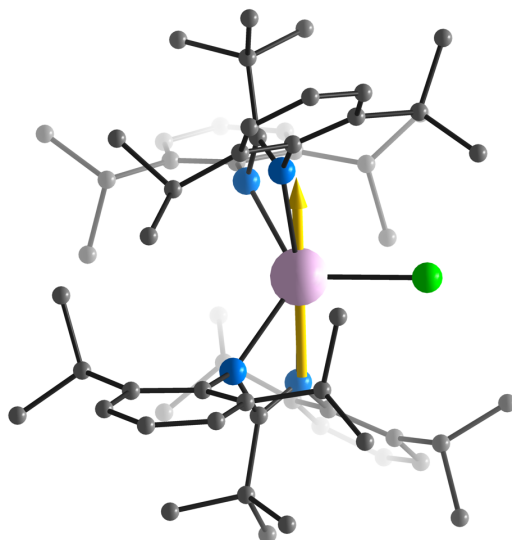

**Figure S83** The principal magnetic axis (yellow arrows) of the ground doublets of Dy(III) ion in **1-Dy-Cl**. Color codes: Dy, lavender; N, blue; Cl, green; C, gray. For clarity, all hydrogen atoms are omitted.

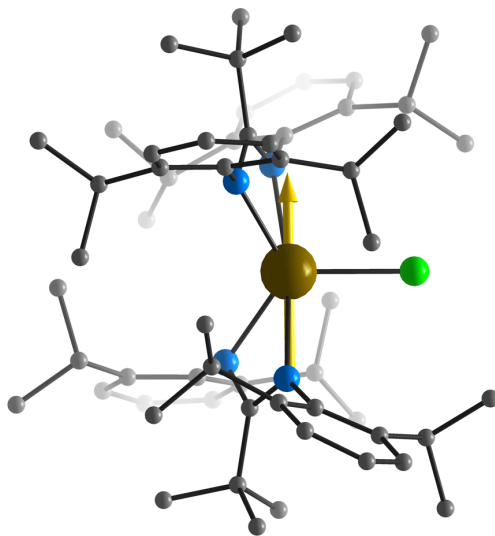

**Figure S84** The principal magnetic axis (yellow arrows) of the ground doublets of Tb(III) ion in **1-Tb-Cl**. Color codes: Tb, brown; N, blue; Cl, green; C, gray. For clarity, all hydrogen atoms are omitted.

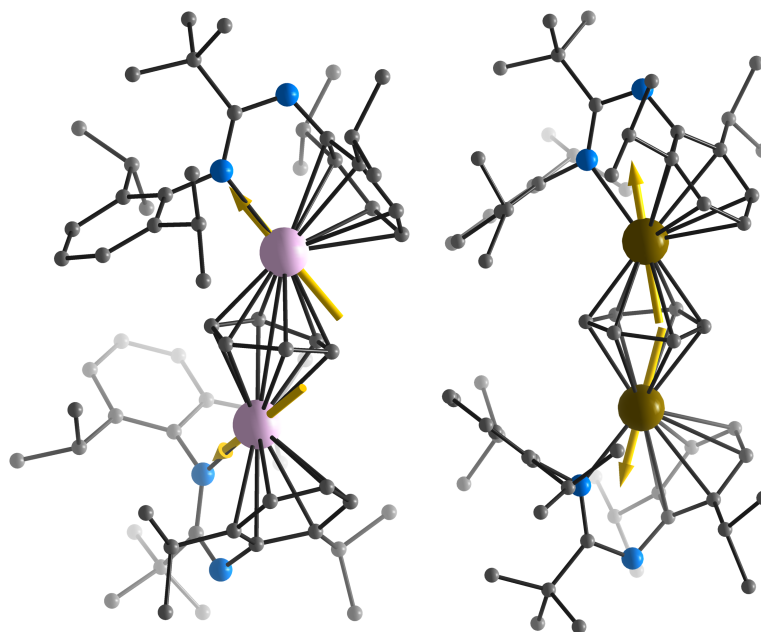

**Figure S85** The principal magnetic axes (yellow arrows) of the ground doublets of Dy(III) ions in **2-Dy** (left) and Tb(III) ions in **2-Tb** (right). Color codes: Dy, lavender; Tb, brown; N, blue; C, gray. For clarity, all hydrogen atoms are omitted.

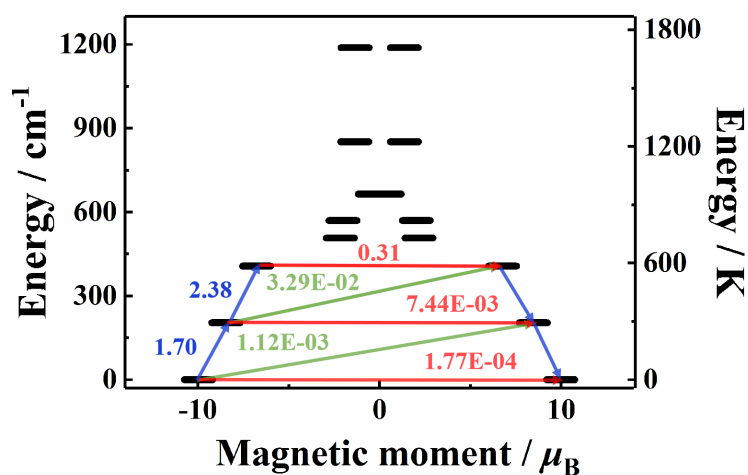

**Figure S86** *Ab initio* calculated possible magnetic relaxation path diagram for **1-Dy-Cl**. Eight Kramers' doublets (KDs) are described as the black bars. The horizontal red arrows show the QTM/TA-QTM process and the non-horizontal arrows represent the spin-phonon transition paths. The numbers beside the arrows are averaged transition moments  $((|\mu_x|+|\mu_y|+|\mu_z|)/3)$  in  $\mu_B$  between the connecting pairs.

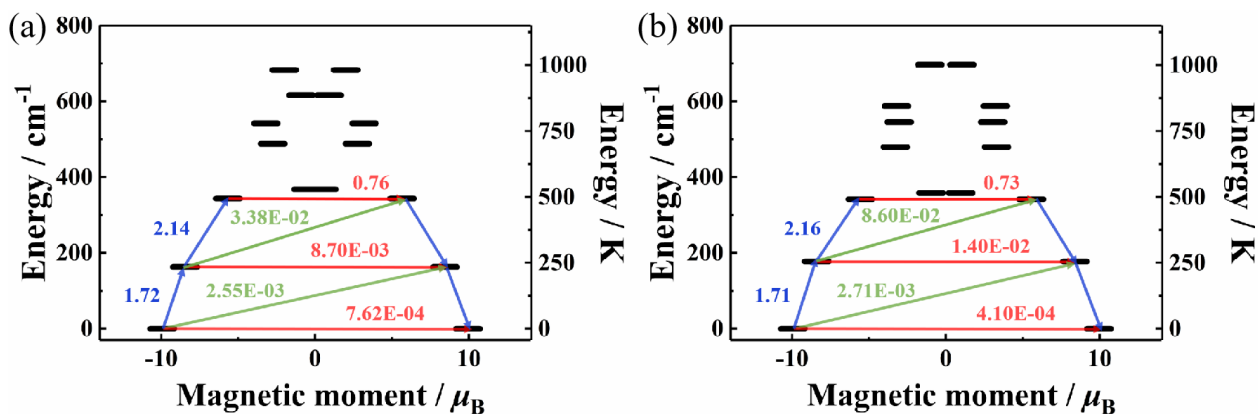

**Figure S87** *Ab initio* calculated possible magnetic relaxation path diagrams for **2-Dy**'s fragment 1(a) and 2(b). Eight Kramers' doublets (KDs) are described as the black bars. The horizontal red arrows show the QTM/TA-QTM process and the non-horizontal arrows represent the spin-phonon transition paths. The numbers beside the arrows are averaged transition moments ( $(|\mu_x|+|\mu_y|+|\mu_z|)/3$ ) in  $\mu_B$  between the connecting pairs.

**Table S17** *Ab initio* calculated crystal field parameters for Dy(III) ion in **1-Dy-Cl**.

| Crystal Field Parameter $B_k^q$ |     | Value / $\text{cm}^{-1}$ |
|---------------------------------|-----|--------------------------|
| $k$                             | $q$ |                          |
| 2                               | -2  | 4.8062519287153E-03      |
| 2                               | -1  | 1.0770973598370E-03      |
| 2                               | 0   | -5.1815616481850E+00     |
| 2                               | 1   | -1.0850722355739E+00     |
| 2                               | 2   | 4.0718366549000E+00      |
| 4                               | -4  | -9.8828553622290E-06     |
| 4                               | -3  | -1.4657697470966E-05     |
| 4                               | -2  | 1.9224393286969E-05      |
| 4                               | -1  | -1.5605589604050E-05     |
| 4                               | 0   | 3.7142537817825E-05      |
| 4                               | 1   | 4.2108258086722E-02      |
| 4                               | 2   | -2.1962234608458E-02     |
| 4                               | 3   | 4.8966583501305E-02      |
| 4                               | 4   | -4.5126456029967E-03     |
| 6                               | -6  | -1.1551147425670E-07     |
| 6                               | -5  | -4.0664013340428E-08     |
| 6                               | -4  | -1.3734824589477E-07     |
| 6                               | -3  | -3.8743205636333E-07     |
| 6                               | -2  | -3.5746630508274E-07     |
| 6                               | -1  | 1.1588107982147E-07      |
| 6                               | 0   | -3.6632757284029E-06     |
| 6                               | 1   | -6.6129788214455E-04     |
| 6                               | 2   | 2.4739303166539E-04      |
| 6                               | 3   | -1.8652723523686E-04     |
| 6                               | 4   | -2.0071418112954E-04     |
| 6                               | 5   | 4.0281081713599E-05      |
| 6                               | 6   | -3.2876231998927E-05     |

**Table S18** *Ab initio* calculated crystal field parameters for Tb(III) ion in **1-Tb-Cl**.

---

| Crystal Field Parameter $B_k^q$ |     | Value / $\text{cm}^{-1}$ |
|---------------------------------|-----|--------------------------|
| $k$                             | $q$ |                          |
| 2                               | -2  | 4.1176619676447E+00      |
| 2                               | -1  | -9.2493023810515E-01     |
| 2                               | 0   | -8.7193831194257E+00     |
| 2                               | 1   | -2.7937375751905E+00     |
| 2                               | 2   | 5.4725836023040E+00      |
| 4                               | -4  | 2.2514596725174E-02      |
| 4                               | -3  | 1.1713575837699E-01      |
| 4                               | -2  | 2.1890942968479E-02      |
| 4                               | -1  | 1.9811029785163E-02      |
| 4                               | 0   | -4.3479897033290E-05     |
| 4                               | 1   | 5.9612865257264E-02      |
| 4                               | 2   | 2.9138308616457E-02      |
| 4                               | 3   | 8.0519499535113E-02      |
| 4                               | 4   | 6.2115314438533E-03      |
| 6                               | -6  | 1.0530071312060E-04      |
| 6                               | -5  | 7.5412289964897E-04      |
| 6                               | -4  | 1.5201667810707E-04      |
| 6                               | -3  | -7.4683048494334E-04     |
| 6                               | -2  | -3.7378518399250E-04     |
| 6                               | -1  | -3.1053811185988E-04     |
| 6                               | 0   | 7.2438155146542E-05      |
| 6                               | 1   | -9.3620505068346E-04     |
| 6                               | 2   | -5.7467259758488E-04     |
| 6                               | 3   | -5.1262452051438E-04     |
| 6                               | 4   | 4.8251515230317E-05      |
| 6                               | 5   | -4.3560203550689E-05     |
| 6                               | 6   | -4.2305731399812E-05     |

---

**Table S19** *Ab initio* calculated crystal field parameters for Dy(III) ion for fragment 1 of **2-Dy**.

---

| Crystal Field Parameter $B_k^q$ |     | Value / $\text{cm}^{-1}$ |
|---------------------------------|-----|--------------------------|
| $k$                             | $q$ |                          |
| 2                               | -2  | -1.0129846971269E+00     |
| 2                               | -1  | 1.0103608202064E+00      |
| 2                               | 0   | -3.0408722767305E+00     |
| 2                               | 1   | 2.1145796051273E+00      |
| 2                               | 2   | -4.5019989312793E-01     |
| 4                               | -4  | 3.2728757180396E-03      |
| 4                               | -3  | -9.5889429917983E-02     |
| 4                               | -2  | 1.7412090231467E-02      |
| 4                               | -1  | -6.1111035935500E-04     |
| 4                               | 0   | -6.8940908735961E-03     |
| 4                               | 1   | 1.5538748558562E-03      |
| 4                               | 2   | 1.0274807858115E-02      |
| 4                               | 3   | -8.5152541723204E-03     |
| 4                               | 4   | -2.0168276842555E-03     |
| 6                               | -6  | 1.8910734463029E-04      |
| 6                               | -5  | 6.8767830209622E-05      |
| 6                               | -4  | -1.0125984003195E-04     |
| 6                               | -3  | 2.6443222255011E-04      |
| 6                               | -2  | -1.1084746117011E-04     |
| 6                               | -1  | -1.2168923822842E-04     |
| 6                               | 0   | 4.0126886562807E-05      |
| 6                               | 1   | -2.6311317897230E-04     |
| 6                               | 2   | 4.0108343350265E-05      |
| 6                               | 3   | -1.4721399570115E-04     |
| 6                               | 4   | -8.2689056405641E-05     |
| 6                               | 5   | -8.3360085918372E-05     |
| 6                               | 6   | -6.5736561256619E-06     |

---



**Table S20** *Ab initio* calculated crystal field parameters for Dy(III) ion in fragment 2 of **2-Dy**.

---

| Crystal Field Parameter $B_k^q$ |     | Value / $\text{cm}^{-1}$ |
|---------------------------------|-----|--------------------------|
| $k$                             | $q$ |                          |
| 2                               | -2  | -5.7176313043384E-01     |
| 2                               | -1  | -1.8630710639546E+00     |
| 2                               | 0   | -3.0022273905238E+00     |
| 2                               | 1   | -8.3120039620588E-01     |
| 2                               | 2   | 1.1323556607792E+00      |
| 4                               | -4  | -1.1211875416156E-02     |
| 4                               | -3  | -5.3114098131481E-02     |
| 4                               | -2  | 1.8309698879165E-02      |
| 4                               | -1  | -2.8925148597594E-03     |
| 4                               | 0   | -6.3436903880737E-03     |
| 4                               | 1   | -7.0305261980547E-03     |
| 4                               | 2   | -1.7001335138726E-02     |
| 4                               | 3   | -6.3405470446651E-02     |
| 4                               | 4   | -2.9312508856753E-03     |
| 6                               | -6  | -1.9560885656143E-04     |
| 6                               | -5  | 3.9678094131367E-05      |
| 6                               | -4  | -3.5701419425345E-05     |
| 6                               | -3  | 2.1147443184475E-04      |
| 6                               | -2  | -5.2166406587441E-05     |
| 6                               | -1  | 2.5344371611225E-04      |
| 6                               | 0   | 2.6405498711325E-05      |
| 6                               | 1   | 2.2038913357972E-04      |
| 6                               | 2   | 8.6294901627854E-05      |
| 6                               | 3   | 3.0557903016131E-04      |
| 6                               | 4   | 1.3342690481019E-05      |
| 6                               | 5   | -1.5676101619977E-04     |
| 6                               | 6   | -1.0841395993717E-04     |

---

**Table S21** *Ab initio* calculated crystal field parameters for Tb(III) ion in fragment 1 of **2-Tb**.

---

| Crystal Field Parameter $B_k^q$ |     | Value / $\text{cm}^{-1}$ |
|---------------------------------|-----|--------------------------|
| $k$                             | $q$ |                          |
| 2                               | -2  | -3.3765390509573E+00     |
| 2                               | -1  | -1.0517486969703E+00     |
| 2                               | 0   | -3.8457392817585E+00     |
| 2                               | 1   | -6.4617353638220E+00     |
| 2                               | 2   | -2.0041683317405E+00     |
| 4                               | -4  | 3.1921614725201E-02      |
| 4                               | -3  | 7.5010676301514E-04      |
| 4                               | -2  | 1.1893808762830E-02      |
| 4                               | -1  | 1.2805923507791E-02      |
| 4                               | 0   | -9.6099545043993E-03     |
| 4                               | 1   | 8.7198422374446E-02      |
| 4                               | 2   | 2.1223507337922E-03      |
| 4                               | 3   | 9.9832544596242E-03      |
| 4                               | 4   | -1.1543509972576E-02     |
| 6                               | -6  | -3.6709104143094E-05     |
| 6                               | -5  | -5.1724021629657E-04     |
| 6                               | -4  | 3.6863400069862E-05      |
| 6                               | -3  | -2.8187015215294E-05     |
| 6                               | -2  | -1.2030966579246E-04     |
| 6                               | -1  | 5.4834789789215E-05      |
| 6                               | 0   | 7.3254850848098E-05      |
| 6                               | 1   | -4.2258321016795E-04     |
| 6                               | 2   | -7.4689412612793E-05     |
| 6                               | 3   | -2.4820359510699E-05     |
| 6                               | 4   | 7.2745677357332E-05      |
| 6                               | 5   | 7.6217129840000E-05      |
| 6                               | 6   | 2.3075844923612E-05      |

---

**Table S22** *Ab initio* calculated crystal field parameters for Tb(III) ion in fragment 2 of **2-Tb**.

---

| Crystal Field Parameter $B_k^q$ |     | Value / $\text{cm}^{-1}$ |
|---------------------------------|-----|--------------------------|
| $k$                             | $q$ |                          |
| 2                               | -2  | -9.0204134786892E-01     |
| 2                               | -1  | 7.0762483494893E+00      |
| 2                               | 0   | -4.7595593947147E+00     |
| 2                               | 1   | -6.5555170669578E-02     |
| 2                               | 2   | 2.9317706081132E+00      |
| 4                               | -4  | -1.9439642877546E-02     |
| 4                               | -3  | 7.1267237834252E-03      |
| 4                               | -2  | 9.7525171099289E-03      |
| 4                               | -1  | -9.9362707399427E-02     |
| 4                               | 0   | -5.4520585925333E-03     |
| 4                               | 1   | 1.7551612051869E-03      |
| 4                               | 2   | 2.8663925139866E-03      |
| 4                               | 3   | 1.2980858989694E-03      |
| 4                               | 4   | 7.1791929336751E-03      |
| 6                               | -6  | -3.8123367700232E-05     |
| 6                               | -5  | 8.4254471112075E-04      |
| 6                               | -4  | 3.7589990292817E-05      |
| 6                               | -3  | 1.3277379293134E-04      |
| 6                               | -2  | -1.2981363208156E-04     |
| 6                               | -1  | 6.2924585762199E-04      |
| 6                               | 0   | 6.2524343682868E-05      |
| 6                               | 1   | -5.1989687522581E-05     |
| 6                               | 2   | 4.2751998240666E-05      |
| 6                               | 3   | 6.2192941672031E-05      |
| 6                               | 4   | 1.1114705753784E-04      |
| 6                               | 5   | 1.4621269486685E-04      |
| 6                               | 6   | -5.4594227415317E-05     |

---

**Table S23** Average transition magnetic moment elements between the states in **1-Dy-Cl**, given in  $\mu_B$ .

| Matrix Element<br>< Mult. <i>i</i>   Mult. <i>j</i> > | Average Value |                 |          |
|-------------------------------------------------------|---------------|-----------------|----------|
| < 1.1+   1.1- >                                       | 1.77E-04      | < 1.1+   4.1- > | 1.03E-01 |
| < 2.1+   2.1- >                                       | 7.44E-03      | < 2.1+   5.1+ > | 1.52E-01 |
| < 3.1+   3.1- >                                       | 3.13E-01      | < 2.1+   5.1- > | 2.69E-01 |
| < 4.1+   4.1- >                                       | 2.60E+00      | < 3.1+   6.1+ > | 9.53E-01 |
| < 5.1+   5.1- >                                       | 1.23E+00      | < 3.1+   6.1- > | 4.52E-01 |
| < 6.1+   6.1- >                                       | 2.27E+00      | < 4.1+   7.1+ > | 3.23E-01 |
| < 7.1+   7.1- >                                       | 3.68E-01      | < 4.1+   7.1- > | 4.02E-01 |
| < 8.1+   8.1- >                                       | 2.35E-02      | < 5.1+   8.1+ > | 8.24E-02 |
| < 1.1+   2.1+ >                                       | 1.70E+00      | < 5.1+   8.1- > | 2.98E-01 |
| < 1.1+   2.1- >                                       | 1.12E-03      | < 1.1+   5.1+ > | 8.32E-02 |
| < 2.1+   3.1+ >                                       | 2.38E+00      | < 1.1+   5.1- > | 9.53E-02 |
| < 2.1+   3.1- >                                       | 3.29E-02      | < 2.1+   6.1+ > | 1.41E-01 |
| < 3.1+   4.1+ >                                       | 2.36E+00      | < 2.1+   6.1- > | 1.65E-01 |
| < 3.1+   4.1- >                                       | 8.51E-01      | < 3.1+   7.1+ > | 5.44E-01 |
| < 4.1+   5.1+ >                                       | 2.16E+00      | < 3.1+   7.1- > | 1.53E-01 |
| < 4.1+   5.1- >                                       | 2.24E+00      | < 4.1+   8.1+ > | 1.09E-01 |
| < 5.1+   6.1+ >                                       | 1.93E+00      | < 4.1+   8.1- > | 1.11E-01 |
| < 5.1+   6.1- >                                       | 2.10E+00      | < 1.1+   6.1+ > | 5.68E-02 |
| < 6.1+   7.1+ >                                       | 1.92E+00      | < 1.1+   6.1- > | 8.23E-02 |
| < 6.1+   7.1- >                                       | 1.79E+00      | < 2.1+   7.1+ > | 1.72E-01 |
| < 7.1+   8.1+ >                                       | 1.92E+00      | < 2.1+   7.1- > | 3.38E-02 |
| < 7.1+   8.1- >                                       | 1.13E-01      | < 3.1+   8.1+ > | 2.16E-01 |
| < 1.1+   3.1+ >                                       | 5.58E-01      | < 3.1+   8.1- > | 3.67E-02 |
| < 1.1+   3.1- >                                       | 5.36E-03      | < 1.1+   7.1+ > | 2.73E-02 |
| < 2.1+   4.1+ >                                       | 2.29E-01      | < 1.1+   7.1- > | 1.20E-02 |
| < 2.1+   4.1- >                                       | 3.05E-01      | < 2.1+   8.1+ > | 9.11E-02 |
| < 3.1+   5.1+ >                                       | 9.75E-01      | < 2.1+   8.1- > | 7.44E-03 |
| < 3.1+   5.1- >                                       | 1.22E+00      | < 1.1+   8.1+ > | 2.10E-02 |
| < 4.1+   6.1+ >                                       | 9.37E-01      | < 1.1+   8.1- > | 2.53E-03 |
| < 4.1+   6.1- >                                       | 4.08E-01      |                 |          |
| < 5.1+   7.1+ >                                       | 2.26E-01      |                 |          |
| < 5.1+   7.1- >                                       | 6.43E-01      |                 |          |
| < 6.1+   8.1+ >                                       | 4.18E-01      |                 |          |
| < 6.1+   8.1- >                                       | 3.18E-01      |                 |          |
| < 1.1+   4.1+ >                                       | 8.21E-02      |                 |          |

**Table S24** Average transition magnetic moment elements between the states in fragment 1 of **2-Dy**, given in  $\mu_B$ .

| Matrix Element<br>< Mult. $i$   Mult. $j$ > | Average Value |                 |          |
|---------------------------------------------|---------------|-----------------|----------|
| < 1.1+   1.1- >                             | 7.62E-04      | < 1.1+   4.1- > | 1.11E-01 |
| < 2.1+   2.1- >                             | 8.70E-03      | < 2.1+   5.1+ > | 5.40E-01 |
| < 3.1+   3.1- >                             | 7.64E-01      | < 2.1+   5.1- > | 1.98E-01 |
| < 4.1+   4.1- >                             | 3.45E+00      | < 3.1+   6.1+ > | 1.41E+00 |
| < 5.1+   5.1- >                             | 1.87E+00      | < 3.1+   6.1- > | 3.82E-01 |
| < 6.1+   6.1- >                             | 1.79E-01      | < 4.1+   7.1+ > | 5.12E-01 |
| < 7.1+   7.1- >                             | 2.29E+00      | < 4.1+   7.1- > | 3.86E-01 |
| < 8.1+   8.1- >                             | 3.38E+00      | < 5.1+   8.1+ > | 4.26E-01 |
| < 1.1+   2.1+ >                             | 1.72E+00      | < 5.1+   8.1- > | 5.28E-01 |
| < 1.1+   2.1- >                             | 2.55E-03      | < 1.1+   5.1+ > | 1.35E-01 |
| < 2.1+   3.1+ >                             | 2.14E+00      | < 1.1+   5.1- > | 5.32E-02 |
| < 2.1+   3.1- >                             | 3.38E-02      | < 2.1+   6.1+ > | 2.64E-01 |
| < 3.1+   4.1+ >                             | 1.06E+00      | < 2.1+   6.1- > | 8.40E-02 |
| < 3.1+   4.1- >                             | 2.23E+00      | < 3.1+   7.1+ > | 8.99E-01 |
| < 4.1+   5.1+ >                             | 2.02E+00      | < 3.1+   7.1- > | 2.51E-01 |
| < 4.1+   5.1- >                             | 1.52E+00      | < 4.1+   8.1+ > | 2.17E-01 |
| < 5.1+   6.1+ >                             | 1.71E+00      | < 4.1+   8.1- > | 3.34E-01 |
| < 5.1+   6.1- >                             | 1.27E+00      | < 1.1+   6.1+ > | 8.20E-02 |
| < 6.1+   7.1+ >                             | 1.11E+00      | < 1.1+   6.1- > | 3.11E-02 |
| < 6.1+   7.1- >                             | 8.29E-01      | < 2.1+   7.1+ > | 2.36E-01 |
| < 7.1+   8.1+ >                             | 2.69E+00      | < 2.1+   7.1- > | 1.51E-01 |
| < 7.1+   8.1- >                             | 2.45E+00      | < 3.1+   8.1+ > | 2.16E-01 |
| < 1.1+   3.1+ >                             | 5.35E-01      | < 3.1+   8.1- > | 2.51E-01 |
| < 1.1+   3.1- >                             | 1.22E-02      | < 1.1+   7.1+ > | 8.92E-02 |
| < 2.1+   4.1+ >                             | 9.09E-01      | < 1.1+   7.1- > | 6.24E-02 |
| < 2.1+   4.1- >                             | 5.13E-01      | < 2.1+   8.1+ > | 1.40E-01 |
| < 3.1+   5.1+ >                             | 1.93E+00      | < 2.1+   8.1- > | 1.09E-01 |
| < 3.1+   5.1- >                             | 3.50E-01      | < 1.1+   8.1+ > | 7.28E-02 |
| < 4.1+   6.1+ >                             | 8.92E-01      | < 1.1+   8.1- > | 2.72E-02 |
| < 4.1+   6.1- >                             | 1.18E+00      |                 |          |
| < 5.1+   7.1+ >                             | 2.85E+00      |                 |          |
| < 5.1+   7.1- >                             | 1.09E+00      |                 |          |
| < 6.1+   8.1+ >                             | 4.73E-01      |                 |          |
| < 6.1+   8.1- >                             | 5.93E-01      |                 |          |
| < 1.1+   4.1+ >                             | 2.28E-01      |                 |          |

**Table S25** Average transition magnetic moment elements between the states in fragment 2 of **2-Dy**, given in  $\mu_B$ .

| Matrix Element<br>< Mult. <i>i</i>   Mult. <i>j</i> > | Average Value |                 |          |
|-------------------------------------------------------|---------------|-----------------|----------|
| < 1.1+   1.1- >                                       | 4.10E-04      | < 1.1+   4.1- > | 1.38E-01 |
| < 2.1+   2.1- >                                       | 1.40E-02      | < 2.1+   5.1+ > | 5.59E-01 |
| < 3.1+   3.1- >                                       | 7.34E-01      | < 2.1+   5.1- > | 1.19E-01 |
| < 4.1+   4.1- >                                       | 2.83E+00      | < 3.1+   6.1+ > | 1.06E+00 |
| < 5.1+   5.1- >                                       | 1.12E+00      | < 3.1+   6.1- > | 2.49E-01 |
| < 6.1+   6.1- >                                       | 6.10E-01      | < 4.1+   7.1+ > | 5.82E-01 |
| < 7.1+   7.1- >                                       | 1.45E+00      | < 4.1+   7.1- > | 4.96E-01 |
| < 8.1+   8.1- >                                       | 2.39E+00      | < 5.1+   8.1+ > | 6.87E-01 |
| < 1.1+   2.1+ >                                       | 1.71E+00      | < 5.1+   8.1- > | 7.76E-01 |
| < 1.1+   2.1- >                                       | 2.71E-03      | < 1.1+   5.1+ > | 1.94E-01 |
| < 2.1+   3.1+ >                                       | 2.16E+00      | < 1.1+   5.1- > | 3.94E-02 |
| < 2.1+   3.1- >                                       | 8.60E-02      | < 2.1+   6.1+ > | 3.11E-01 |
| < 3.1+   4.1+ >                                       | 1.41E+00      | < 2.1+   6.1- > | 1.79E-02 |
| < 3.1+   4.1- >                                       | 1.92E+00      | < 3.1+   7.1+ > | 7.34E-01 |
| < 4.1+   5.1+ >                                       | 1.59E+00      | < 3.1+   7.1- > | 4.81E-01 |
| < 4.1+   5.1- >                                       | 1.59E+00      | < 4.1+   8.1+ > | 2.36E-01 |
| < 5.1+   6.1+ >                                       | 1.86E+00      | < 4.1+   8.1- > | 1.64E-01 |
| < 5.1+   6.1- >                                       | 9.70E-01      | < 1.1+   6.1+ > | 3.73E-02 |
| < 6.1+   7.1+ >                                       | 9.82E-01      | < 1.1+   6.1- > | 9.65E-03 |
| < 6.1+   7.1- >                                       | 9.48E-01      | < 2.1+   7.1+ > | 1.94E-01 |
| < 7.1+   8.1+ >                                       | 1.87E+00      | < 2.1+   7.1- > | 1.15E-01 |
| < 7.1+   8.1- >                                       | 1.68E+00      | < 3.1+   8.1+ > | 2.74E-01 |
| < 1.1+   3.1+ >                                       | 5.33E-01      | < 3.1+   8.1- > | 1.46E-01 |
| < 1.1+   3.1- >                                       | 2.46E-02      | < 1.1+   7.1+ > | 9.18E-02 |
| < 2.1+   4.1+ >                                       | 8.65E-01      | < 1.1+   7.1- > | 3.62E-02 |
| < 2.1+   4.1- >                                       | 6.56E-01      | < 2.1+   8.1+ > | 1.15E-01 |
| < 3.1+   5.1+ >                                       | 2.38E+00      | < 2.1+   8.1- > | 8.41E-02 |
| < 3.1+   5.1- >                                       | 3.65E-01      | < 1.1+   8.1+ > | 5.39E-02 |
| < 4.1+   6.1+ >                                       | 7.15E-01      | < 1.1+   8.1- > | 2.46E-02 |
| < 4.1+   6.1- >                                       | 1.30E+00      |                 |          |
| < 5.1+   7.1+ >                                       | 2.62E+00      |                 |          |
| < 5.1+   7.1- >                                       | 2.00E+00      |                 |          |
| < 6.1+   8.1+ >                                       | 4.54E-01      |                 |          |
| < 6.1+   8.1- >                                       | 4.81E-01      |                 |          |
| < 1.1+   4.1+ >                                       | 2.21E-01      |                 |          |

**Table S26** Calculated energies of spin-orbit states ( $\text{cm}^{-1}$ ), the corresponding tunneling splitting's ( $\text{cm}^{-1}$ ) and  $g_z$  values of the low-lying exchange doublets of **2-Dy**.

| $E$   | $\Delta_{\text{tun}}$ | $g_z$  |
|-------|-----------------------|--------|
| 0.000 | $5.73 \times 10^{-6}$ | 26.403 |
| 0.000 |                       |        |
| 1.038 | $5.41 \times 10^{-6}$ | 29.269 |
| 1.038 |                       |        |

**Table S27** Calculated energies of spin-orbit states ( $\text{cm}^{-1}$ ), the corresponding tunneling splittings ( $\text{cm}^{-1}$ ) and  $g_z$  values of the low-lying exchange doublets of **2-Tb**.

| $E$    | $\Delta_{\text{tun}}$ | $g_z$  |
|--------|-----------------------|--------|
| 0.000  | $2.96 \times 10^{-5}$ | 7.528  |
| 0.000  |                       |        |
| 13.644 | $2.95 \times 10^{-5}$ | 34.999 |
| 13.644 |                       |        |

**Table S28** DFT calculated energies of the high spin (HS) and broken symmetry (BS) states for model complex **2-Gd\***.

| Spin State | Energy / Eh  | Spin Value $\langle S^2 \rangle$ | $J_{\text{ex}}^{\text{Gd-Gd}} / \text{cm}^{-1}$ | $J_{\text{ex}}^{\text{Dy-Dy}} / \text{cm}^{-1}$ | $J_{\text{ex}}^{\text{Tb-Tb}} / \text{cm}^{-1}$ |
|------------|--------------|----------------------------------|-------------------------------------------------|-------------------------------------------------|-------------------------------------------------|
| HS         | 24893.268369 | 56.0549                          | -2.56                                           | -5.02                                           | -3.48                                           |
| BS         | 24893.268940 | 7.0988                           |                                                 |                                                 |                                                 |

**Table S29** DFT calculated energies of the high spin (HS) and broken symmetry (BS) states for model complex **2-Gd\***.

|              | Spin State | Spin population on Gd1 | Spin population on Gd2 |
|--------------|------------|------------------------|------------------------|
| <b>2-Gd*</b> | HS         | 7.173499               | 7.173575               |
|              | BS         | 7.302390               | -7.302311              |

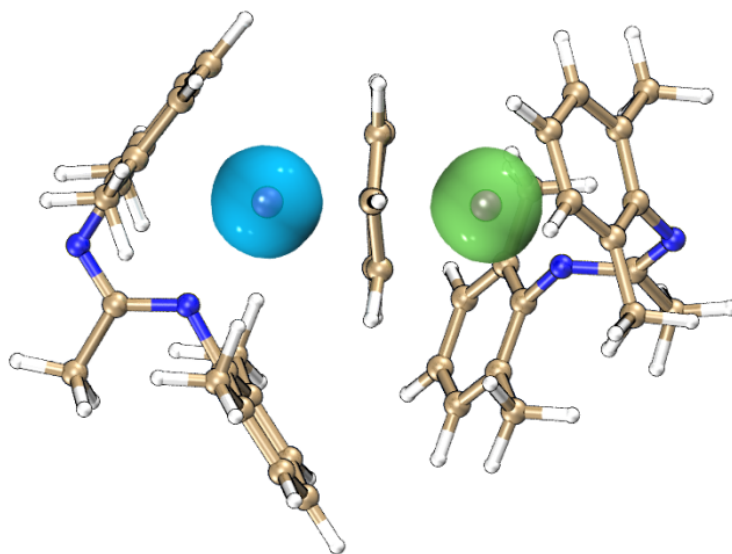

**Figure S88** DFT calculated spin density distributions (isovalue = 0.01 a.u.) of the BS state for model complex **2-Gd\***. Color codes: Gd, purple; N, blue; C, tan; H, white.



**Table S30** Natural population analysis (NPA) for **2-Y<sup>opt</sup>**. Note: C atoms marked in blue and red correspond to the ones on the central C<sub>6</sub>H<sub>6</sub><sup>4-</sup> bridge and phenyl of terminal Piso ligand.

| Atom | Natural Charge  | Core     | Valence | Rydberg | Total    |
|------|-----------------|----------|---------|---------|----------|
| Y    | 1.23996         | 35.97734 | 1.70044 | 0.08227 | 37.76004 |
| Y    | 1.24124         | 35.97728 | 1.69991 | 0.08157 | 37.75876 |
| N    | -0.74058        | 1.99917  | 5.71923 | 0.02218 | 7.74058  |
| C    | <b>-0.54279</b> | 1.99834  | 4.51797 | 0.02648 | 6.54279  |
| C    | <b>-0.53339</b> | 1.99832  | 4.50773 | 0.02734 | 6.53339  |
| C    | <b>-0.25813</b> | 1.99887  | 4.23977 | 0.01949 | 6.25813  |
| C    | <b>-0.5303</b>  | 1.99847  | 4.50504 | 0.02679 | 6.5303   |
| C    | <b>-0.56701</b> | 1.99817  | 4.53994 | 0.02889 | 6.56701  |
| C    | <b>-0.51932</b> | 1.99847  | 4.49427 | 0.02658 | 6.51932  |
| C    | <b>-0.28275</b> | 1.99895  | 4.26257 | 0.02123 | 6.28275  |
| C    | <b>-0.04233</b> | 1.99883  | 4.0197  | 0.02381 | 6.04233  |
| C    | <b>-0.53008</b> | 1.99846  | 4.50386 | 0.02777 | 6.53008  |
| C    | <b>0.15637</b>  | 1.99855  | 3.81731 | 0.02777 | 5.84363  |
| C    | <b>-0.26734</b> | 1.99886  | 4.24869 | 0.01979 | 6.26734  |
| C    | <b>-0.04548</b> | 1.9988   | 4.02286 | 0.02382 | 6.04548  |
| N    | -0.74348        | 1.99917  | 5.72225 | 0.02207 | 7.74348  |
| C    | <b>0.15181</b>  | 1.99854  | 3.82129 | 0.02837 | 5.84819  |
| C    | <b>-0.04626</b> | 1.99879  | 4.02305 | 0.02442 | 6.04626  |
| C    | <b>-0.26779</b> | 1.99885  | 4.24865 | 0.02029 | 6.26779  |
| C    | <b>-0.04314</b> | 1.99882  | 4.01986 | 0.02445 | 6.04314  |
| C    | <b>-0.25495</b> | 1.99887  | 4.2368  | 0.01929 | 6.25495  |
| C    | <b>-0.27882</b> | 1.99895  | 4.25943 | 0.02043 | 6.27882  |
| C    | 0.46898         | 1.99916  | 3.50616 | 0.0257  | 5.53102  |
| C    | <b>0.15641</b>  | 1.99881  | 3.82196 | 0.02282 | 5.84359  |
| H    | 0.30279         | 0        | 0.69479 | 0.00242 | 0.69721  |
| H    | 0.30552         | 0        | 0.69213 | 0.00235 | 0.69448  |
| H    | 0.268           | 0        | 0.72972 | 0.00228 | 0.732    |
| H    | 0.29036         | 0        | 0.70732 | 0.00232 | 0.70964  |
| H    | 0.31276         | 0        | 0.68483 | 0.00242 | 0.68724  |
| H    | 0.29122         | 0        | 0.70639 | 0.00239 | 0.70878  |
| H    | 0.27565         | 0        | 0.72211 | 0.00224 | 0.72435  |
| C    | -0.73812        | 1.99954  | 4.72985 | 0.00874 | 6.73812  |
| H    | 0.28586         | 0        | 0.71188 | 0.00226 | 0.71414  |
| N    | -0.56729        | 1.99927  | 5.53439 | 0.03363 | 7.56729  |
| H    | 0.27145         | 0        | 0.72627 | 0.00228 | 0.72855  |
| C    | -0.73791        | 1.99954  | 4.72949 | 0.00888 | 6.73791  |
| C    | 0.47191         | 1.99916  | 3.50394 | 0.02499 | 5.52809  |
| C    | <b>0.15664</b>  | 1.99883  | 3.82133 | 0.0232  | 5.84336  |
| N    | -0.5667         | 1.99928  | 5.53359 | 0.03383 | 7.5667   |
| C    | -0.73736        | 1.99953  | 4.72903 | 0.0088  | 6.73736  |
| H    | 0.27041         | 0        | 0.72725 | 0.00234 | 0.72959  |
| C    | -0.73877        | 1.99954  | 4.73045 | 0.00878 | 6.73877  |
| H    | 0.26811         | 0        | 0.72957 | 0.00232 | 0.73189  |
| H    | 0.27559         | 0        | 0.7222  | 0.00221 | 0.72441  |
| C    | -0.78159        | 1.99951  | 4.77298 | 0.0091  | 6.78159  |
| C    | <b>-0.0339</b>  | 1.99897  | 4.01648 | 0.01846 | 6.0339   |
| C    | <b>-0.04077</b> | 1.99897  | 4.02345 | 0.01835 | 6.04077  |
| H    | 0.26939         | 0        | 0.72815 | 0.00246 | 0.73061  |
| H    | 0.2706          | 0        | 0.72701 | 0.0024  | 0.7294   |
| C    | -0.78305        | 1.99952  | 4.77508 | 0.00845 | 6.78305  |

|          |                 |           |           |         |         |
|----------|-----------------|-----------|-----------|---------|---------|
| <b>C</b> | <b>-0.03908</b> | 1.99898   | 4.02234   | 0.01776 | 6.03908 |
| <b>C</b> | <b>-0.0338</b>  | 1.99898   | 4.01678   | 0.01804 | 6.0338  |
| H        | 0.27012         | 0         | 0.72762   | 0.00226 | 0.72988 |
| H        | 0.26976         | 0         | 0.7279    | 0.00234 | 0.73024 |
| <b>C</b> | <b>-0.2477</b>  | 1.999     | 4.23278   | 0.01592 | 6.2477  |
| C        | -0.73207        | 1.99953   | 4.72461   | 0.00793 | 6.73207 |
| <b>C</b> | <b>-0.25193</b> | 1.999     | 4.23715   | 0.01578 | 6.25193 |
| C        | -0.73137        | 1.99953   | 4.72404   | 0.00779 | 6.73137 |
| C        | -0.73367        | 1.99955   | 4.72645   | 0.00767 | 6.73367 |
| <b>C</b> | <b>-0.24954</b> | 1.99902   | 4.23533   | 0.01519 | 6.24954 |
| C        | -0.73275        | 1.99953   | 4.72514   | 0.00808 | 6.73275 |
| <b>C</b> | <b>-0.24796</b> | 1.99902   | 4.23333   | 0.01561 | 6.24796 |
| H        | 0.23996         | 0         | 0.75766   | 0.00238 | 0.76004 |
| <b>C</b> | <b>-0.25596</b> | 1.99907   | 4.24117   | 0.01572 | 6.25596 |
| H        | 0.25055         | 0         | 0.74694   | 0.00251 | 0.74945 |
| H        | 0.23998         | 0         | 0.75768   | 0.00233 | 0.76002 |
| H        | 0.25467         | 0         | 0.74283   | 0.0025  | 0.74533 |
| H        | 0.25467         | 0         | 0.74281   | 0.00253 | 0.74533 |
| <b>C</b> | <b>-0.25553</b> | 1.99908   | 4.24124   | 0.01521 | 6.25553 |
| H        | 0.23945         | 0         | 0.7581    | 0.00245 | 0.76055 |
| H        | 0.24974         | 0         | 0.74779   | 0.00247 | 0.75026 |
| H        | 0.23901         | 0         | 0.75851   | 0.00249 | 0.76099 |
| H        | 0.24452         | 0         | 0.75313   | 0.00234 | 0.75548 |
| H        | 0.24449         | 0         | 0.75312   | 0.00239 | 0.75551 |
| H        | 0.25153         | 0         | 0.74627   | 0.0022  | 0.74847 |
| H        | 0.25255         | 0         | 0.74492   | 0.00252 | 0.74745 |
| H        | 0.25427         | 0         | 0.74348   | 0.00225 | 0.74573 |
| H        | 0.26003         | 0         | 0.7375    | 0.00248 | 0.73997 |
| H        | 0.27659         | 0         | 0.72058   | 0.00283 | 0.72341 |
| H        | 0.24945         | 0         | 0.74844   | 0.00212 | 0.75055 |
| H        | 0.25068         | 0         | 0.74724   | 0.00208 | 0.74932 |
| H        | 0.2772          | 0         | 0.72      | 0.0028  | 0.7228  |
| H        | 0.27329         | 0         | 0.72451   | 0.00219 | 0.72671 |
| H        | 0.26034         | 0         | 0.7375    | 0.00216 | 0.73966 |
| H        | 0.2619          | 0         | 0.73597   | 0.00213 | 0.7381  |
| H        | 0.27646         | 0         | 0.72076   | 0.00279 | 0.72354 |
| H        | 0.24924         | 0         | 0.74872   | 0.00204 | 0.75076 |
| H        | 0.2507          | 0         | 0.74727   | 0.00203 | 0.7493  |
| H        | 0.27707         | 0         | 0.72015   | 0.00278 | 0.72293 |
| H        | 0.26016         | 0         | 0.73767   | 0.00217 | 0.73984 |
| H        | 0.2611          | 0         | 0.73674   | 0.00216 | 0.7389  |
| H        | 0.27337         | 0         | 0.72453   | 0.0021  | 0.72663 |
| H        | 0.2552          | 0         | 0.74257   | 0.00223 | 0.7448  |
| H        | 0.2584          | 0         | 0.73909   | 0.00251 | 0.7416  |
| H        | 0.25166         | 0         | 0.7462    | 0.00214 | 0.74834 |
| H        | 0.25163         | 0         | 0.74583   | 0.00253 | 0.74837 |
| Total    | 0               | 163.90878 | 240.91881 | 1.1724  | 406     |

**Table S31** Calculated atoms-in-molecules (AIM) charges based on the basin analysis for **2-Y<sup>opt</sup>**. Note: C atoms marked in blue and red correspond to the ones on the central C<sub>6</sub>H<sub>6</sub><sup>4-</sup> bridge and phenyl of terminal Pico ligand.

| Atom | AIM Charge | Atomic Volume/<br>Bohr <sup>3</sup> | Atom | AIM Charge | Atomic Volume/<br>Bohr <sup>3</sup> |
|------|------------|-------------------------------------|------|------------|-------------------------------------|
| Y    | 1.809891   | 109.69                              | H    | 0.015273   | 46.499                              |
| Y    | 1.810138   | 109.9                               | C    | 0.061172   | 65.135                              |
| N    | -1.318902  | 86.637                              | C    | -0.021838  | 65.578                              |
| C    | -0.365765  | 80.396                              | C    | -0.018374  | 64.108                              |
| C    | -0.358442  | 79.404                              | H    | 0.013159   | 46.103                              |
| C    | -0.085135  | 76.405                              | H    | 0.013868   | 46.218                              |
| C    | -0.349804  | 81.383                              | C    | -0.019771  | 82.363                              |
| C    | -0.363134  | 65.853                              | C    | 0.078635   | 64.18                               |
| C    | -0.347536  | 81.942                              | C    | -0.023666  | 81.341                              |
| C    | -0.0944    | 72.777                              | C    | 0.079123   | 63.709                              |
| C    | -0.07859   | 64.109                              | C    | 0.080091   | 63.722                              |
| C    | -0.327343  | 69.984                              | C    | -0.023269  | 81.491                              |
| C    | 0.3649     | 50.305                              | C    | 0.079101   | 64.46                               |
| C    | -0.094957  | 75.572                              | C    | -0.019492  | 82.022                              |
| C    | -0.083635  | 63.419                              | H    | -0.001253  | 49.323                              |
| N    | -1.31531   | 86.779                              | C    | -0.021608  | 84.323                              |
| C    | 0.361731   | 50.335                              | H    | -0.018353  | 48.365                              |
| C    | -0.084428  | 63.379                              | H    | -0.002203  | 48.511                              |
| C    | -0.0946    | 75.966                              | H    | -0.017512  | 49.818                              |
| C    | -0.076639  | 64.057                              | H    | -0.016895  | 49.313                              |
| C    | -0.083837  | 76.109                              | C    | -0.022034  | 84.173                              |
| C    | -0.093708  | 72.815                              | H    | -0.00163   | 48.502                              |
| C    | 1.123632   | 41.907                              | H    | -0.018768  | 47.562                              |
| C    | 0.350435   | 52.081                              | H    | -0.002551  | 49.298                              |
| H    | 0.035062   | 46.974                              | H    | 0.003564   | 48.764                              |
| H    | 0.041079   | 46.447                              | H    | 0.00448    | 48.785                              |
| H    | 0.03064    | 47.573                              | H    | -0.022051  | 48.871                              |
| H    | 0.011088   | 49.656                              | H    | -0.014546  | 47.861                              |
| H    | 0.056096   | 41.655                              | H    | -0.016785  | 50.714                              |
| H    | 0.013285   | 49.855                              | H    | -0.010091  | 48.846                              |
| H    | 0.03787    | 47.081                              | H    | 0.018927   | 47.377                              |
| C    | 0.08063    | 65.174                              | H    | -0.018755  | 48.943                              |
| H    | 0.002772   | 49.789                              | H    | -0.017453  | 48.811                              |
| N    | -1.232282  | 112.177                             | H    | 0.020157   | 47.247                              |
| H    | 0.034193   | 47.633                              | H    | 0.013672   | 47.327                              |
| C    | 0.077683   | 65.26                               | H    | -0.002295  | 46.815                              |
| C    | 1.122136   | 41.856                              | H    | -0.001657  | 47.328                              |
| C    | 0.34883    | 51.969                              | H    | 0.018627   | 47.397                              |
| N    | -1.233595  | 112.056                             | H    | -0.020378  | 48.943                              |
| C    | 0.078738   | 65.186                              | H    | -0.018014  | 48.848                              |
| H    | 0.033062   | 47.69                               | H    | 0.019725   | 47.34                               |
| C    | 0.078929   | 65.228                              | H    | -0.003289  | 47.27                               |
| H    | 0.031522   | 47.548                              | H    | -0.001622  | 47.004                              |
| H    | 0.038087   | 46.942                              | H    | 0.013403   | 47.328                              |
| C    | 0.061841   | 65.215                              | H    | -0.015866  | 50.954                              |
| C    | -0.01765   | 64.037                              | H    | -0.011191  | 47.967                              |
| C    | -0.021758  | 64.949                              | H    | -0.021174  | 48.84                               |
| H    | 0.013906   | 45.661                              | H    | -0.015319  | 47.596                              |

**Table S32** The calculated properties of real space functions at BCPs for **2Y<sup>opt</sup>**  
(a.u.).

|                      |         |         |         |         |         |         |         |         |
|----------------------|---------|---------|---------|---------|---------|---------|---------|---------|
|                      | Y1-N1   | Y1-C1   | Y1-C2   | Y1-C3   | Y1-C4   | Y1-C5   | Y2-N2   | Y2-C1   |
| $\rho(r)$            | 0.0539  | 0.0556  | 0.0503  | 0.0522  | 0.0262  | 0.0274  | 0.0543  | 0.0533  |
| $H(r)$               | -0.0052 | -0.0071 | -0.0048 | -0.0055 | 0.0004  | 0.0003  | -0.0053 | -0.0063 |
| $\nabla^2_{\rho(r)}$ | 0.1708  | 0.1748  | 0.1683  | 0.1722  | 0.0879  | 0.0910  | 0.1720  | 0.1662  |
| $G(r)$               | 0.0478  | 0.0508  | 0.0469  | 0.0486  | 0.0215  | 0.0225  | 0.0483  | 0.0479  |
| $V(r)$               | -0.0530 | -0.0579 | -0.0518 | -0.0541 | -0.0211 | -0.0222 | -0.0535 | -0.0542 |
| $ V(r) /G(r)$        | 1.1088  | 1.1398  | 1.1045  | 1.1132  | 0.9814  | 0.9867  | 1.1077  | 1.1315  |
|                      | Y2-C2   | Y2-C3   | Y2-C6   | Y2-C7   |         |         |         |         |
| $\rho(r)$            | 0.0532  | 0.0527  | 0.0267  | 0.0274  |         |         |         |         |
| $H(r)$               | -0.0061 | -0.0056 | 0.0004  | 0.0003  |         |         |         |         |
| $\nabla^2_{\rho(r)}$ | 0.1668  | 0.1774  | 0.0892  | 0.0901  |         |         |         |         |
| $G(r)$               | 0.0478  | 0.0500  | 0.0220  | 0.0223  |         |         |         |         |
| $V(r)$               | -0.0540 | -0.0557 | -0.0216 | -0.0220 |         |         |         |         |
| $ V(r) /G(r)$        | 1.1297  | 1.1140  | 0.9818  | 0.9865  |         |         |         |         |

Note: Poincare-Hopf relationship is satisfied, indicating that all CPs may have been found. C1-C3 represent the carbon atoms on the central  $C_6H_6^{4-}$  bridge while the rest of carbon atoms C4-C7 are on the terminal Pido ligand.

## 8. References

1. W. A. Blackmore, G. K. Gransbury, P. Evans, D. P. Mills and N. F. Chilton, *Phys. Chem. Chem. Phys.*, 2023, **25**, 16735–16744.
2. G. K. Gransbury, S. C. Corner, J. G. C. Kragoskow, P. Evans, H. M. Yeung, W. J. A. Blackmore, G. F. S. Whitehead, I. J. Vitorica-Yrezabal, N. F. Chilton and D. P. Mills, *J. Am. Chem. Soc.*, 2023, **145**, 22814–22825.
3. R. Zorn, *J. Chem. Phys.* 2002, **116**, 3204–3209.
